# Supplementary material for: Physiological, Ultrastructural and Proteomic Responses in the Leaf of Maize Seedlings to Polyethylene Glycol-Stimulated Severe Water Deficiency
Source: MDPI journal article supplement (doi:10.3390/ijms160921606), 2015-09-08
Supplement: s1 [file s1]

4700 MS/MS Precursor 2143.05 Spec #1 MC[BP = 1072.6, 1744]

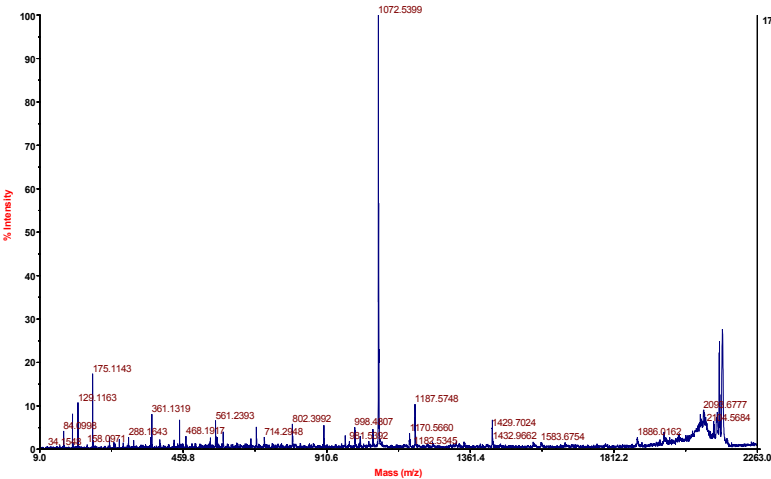

E:\...\D3\_MSMS\_2143.0537\_3.t2d

Acquired:

4700 MS/MS Precursor 2099.06 Spec #1 MC[BP = 1042.6, 219]

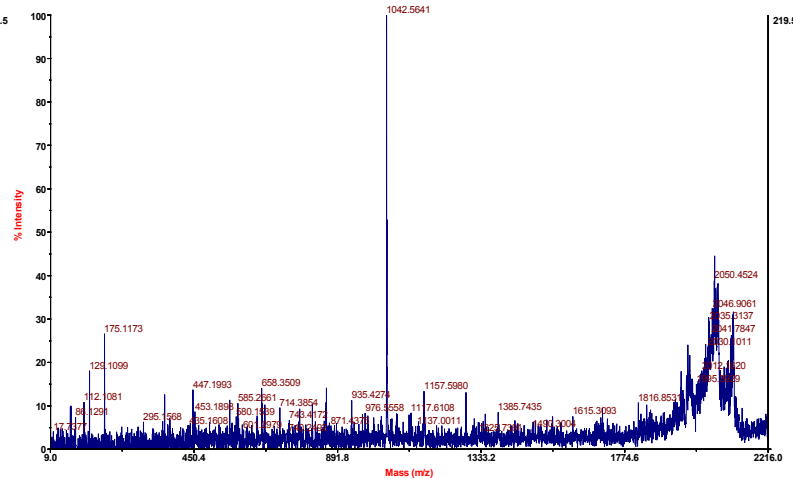

E:\...\D3\_MSMS\_2099.0608\_10.t2d

Acquired:

4700 MS/MS Precursor 1967.91 Spec #1 MC[BP = 175.1, 451]

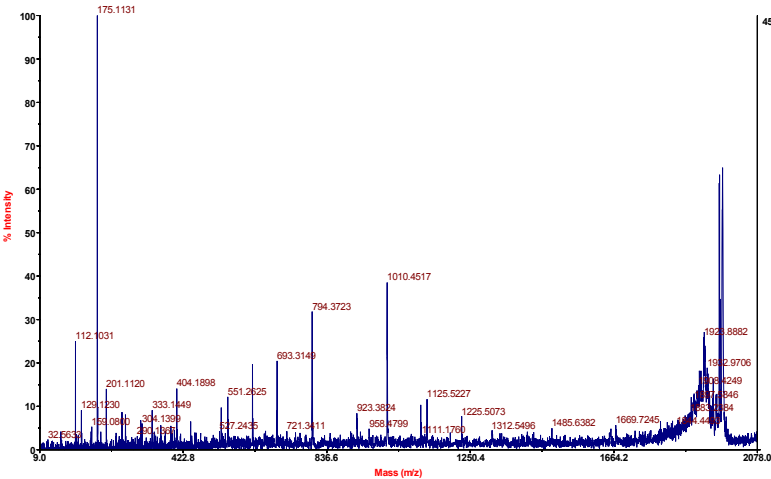

E:\...\D3\_MSMS\_1967.9098\_7.t2d

Acquired:

4700 MS/MS Precursor 1657.79 Spec #1 MC[BP = 175.1, 1069]

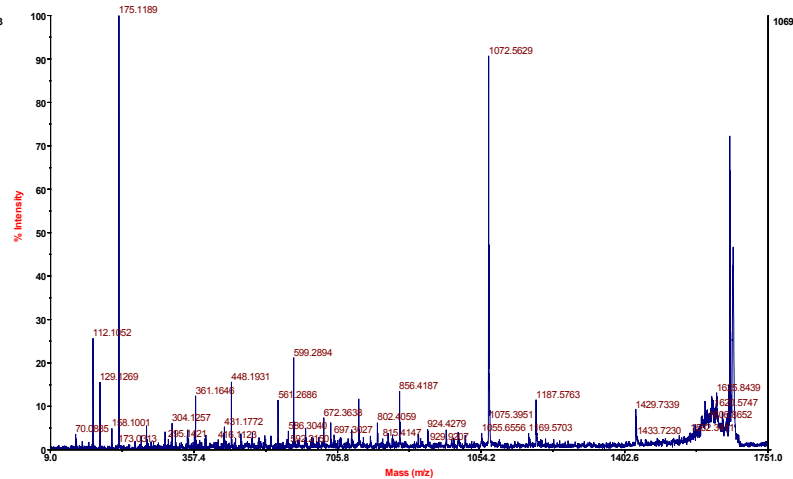

E:\...\D3\_MSMS\_1657.7876\_5.t2d

Acquired:

4700 MS/MS Precursor 1613.79 Spec #1 MC[BP = 175.1, 291]

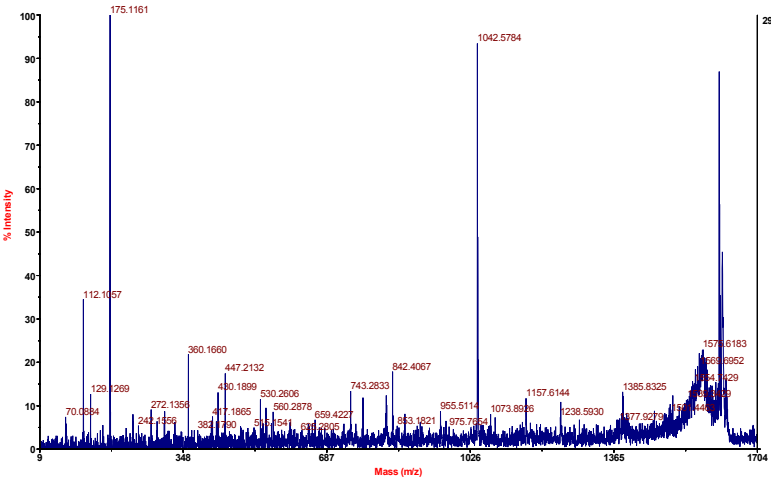

E:\...\D3\_MSMS\_1613.7863\_9.t2d

Acquired:

4700 MS/MS Precursor 1002.53 Spec #1 MC[BP = 846.5, 4399]

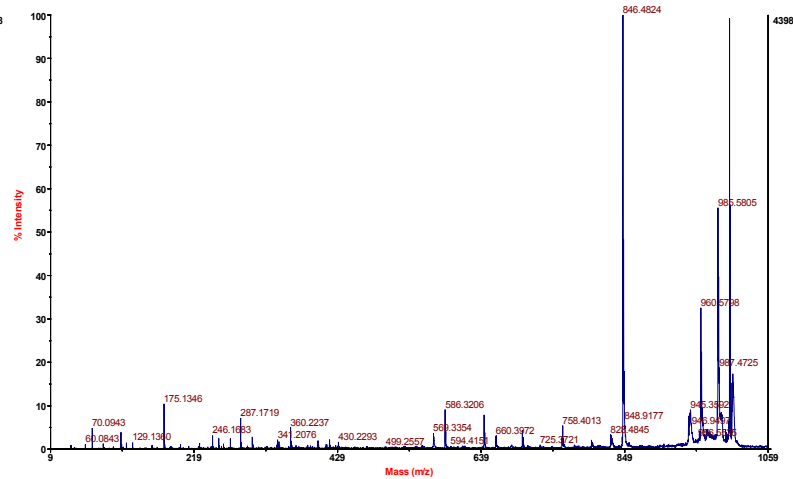

E:\...\D3\_MSMS\_1002.5262\_4.t2d

Acquired:

4700 MS/MS Precursor 974.498 Spec #1 MC[BP = 974.6, 356]

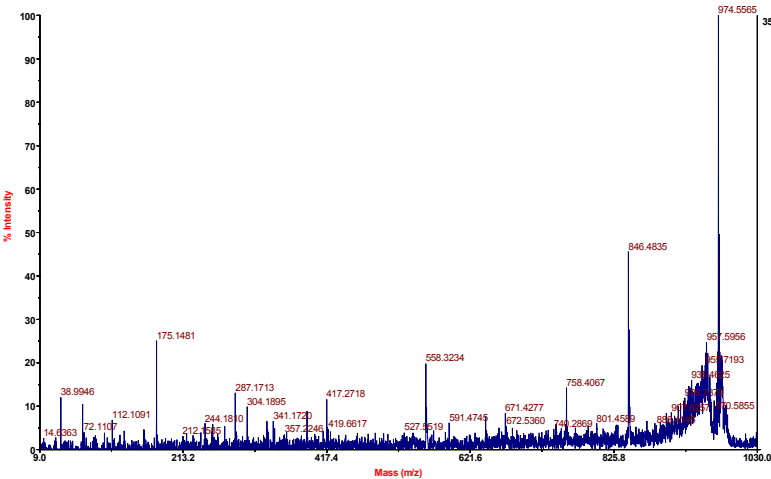

E:\...\D3\_MSMS\_974.4985\_11.t2d

Acquired:

4700 MS/MS Precursor 870.545 Spec #1 MC[BP = 870.6, 3810]

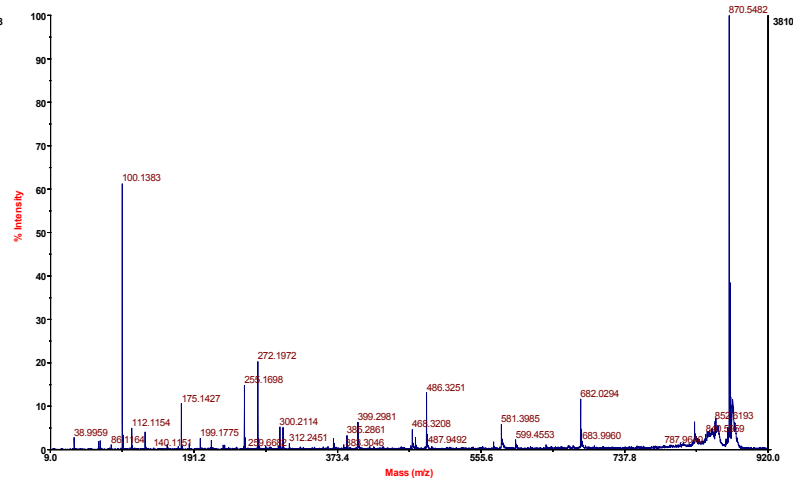

E:\...\D3\_MSMS\_870.5446\_6.t2d

Acquired:
