# Supplementary material for: Physiological, Ultrastructural and Proteomic Responses in the Leaf of Maize Seedlings to Polyethylene Glycol-Stimulated Severe Water Deficiency
Source: MDPI journal article supplement (doi:10.3390/ijms160921606), 2015-09-08
Supplement: s1 [file s1]

4700 MS/MS Precursor 1747.95 Spec #1 MC[BP = 175.1, 436]

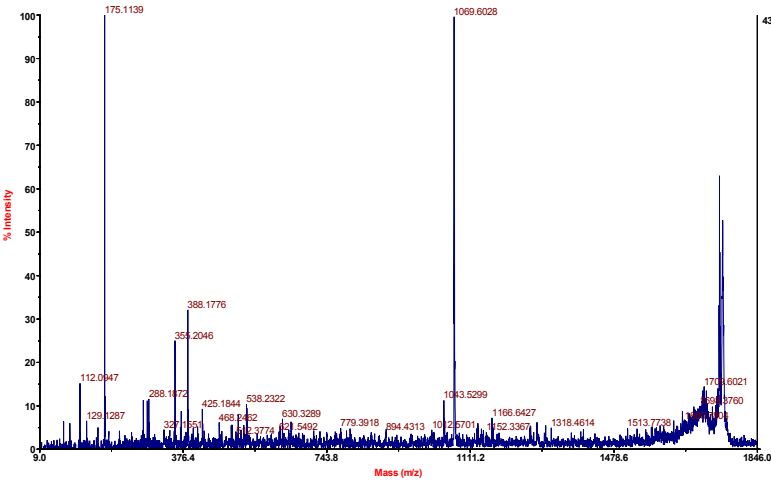

E:\...\C5\_MSMS\_1747.9469\_4.t2d  
Acquired:

4700 MS/MS Precursor 1651.69 Spec #1 MC[BP = 431.2, 231]

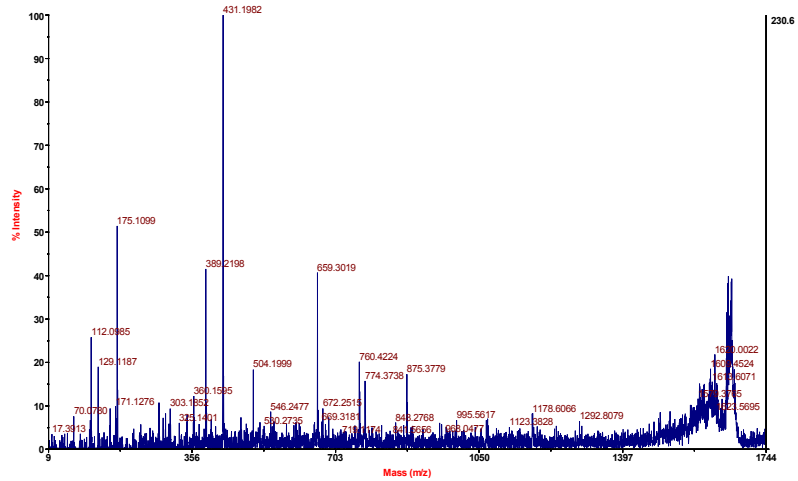

E:\...\C5\_MSMS\_1651.6931\_8.t2d  
Acquired:

4700 MS/MS Precursor 1575.74 Spec #1 MC[BP = 175.1, 218]

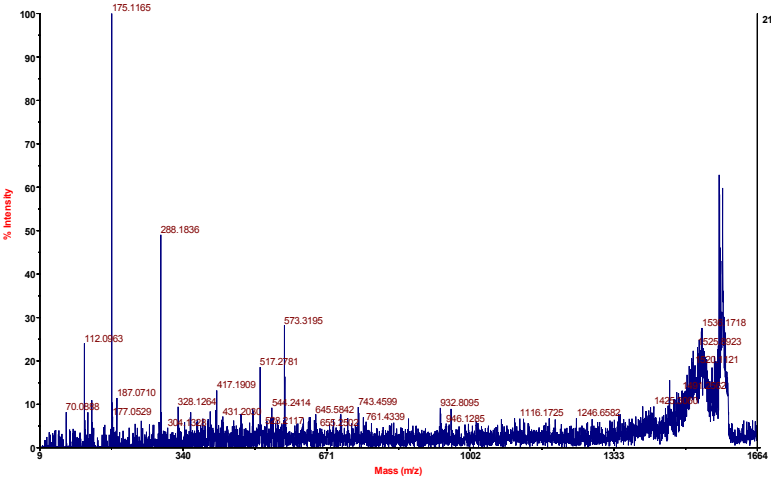

E:\...\C5\_MSMS\_1575.7383\_7.t2d  
Acquired:

4700 MS/MS Precursor 1541.76 Spec #1 MC[BP = 175.1, 171]

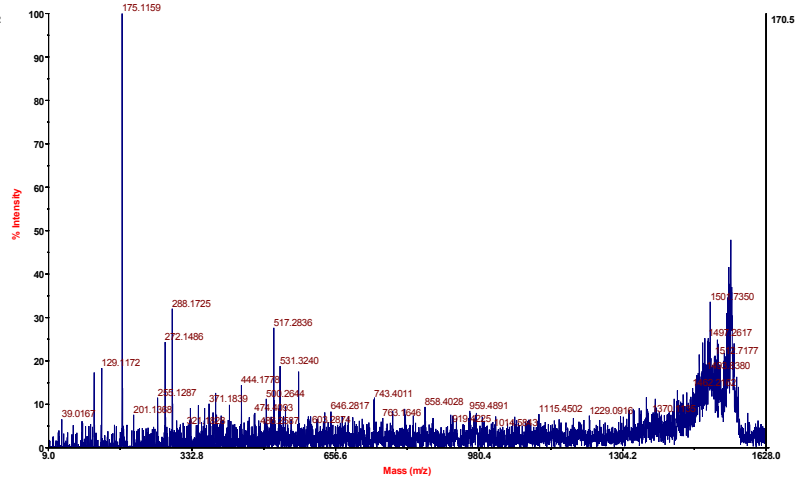

E:\...\C5\_MSMS\_1541.7626\_11.t2d  
Acquired:

4700 MS/MS Precursor 1344.62 Spec #1 MC[BP = 1344.7, 496]

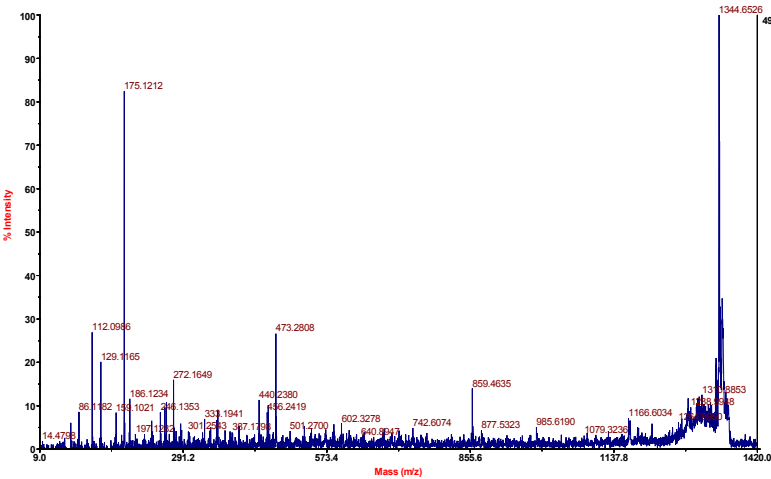

E:\...\C5\_MSMS\_1344.6162\_6.t2d  
Acquired:

4700 MS/MS Precursor 1337.64 Spec #1 MC[BP = 175.1, 250]

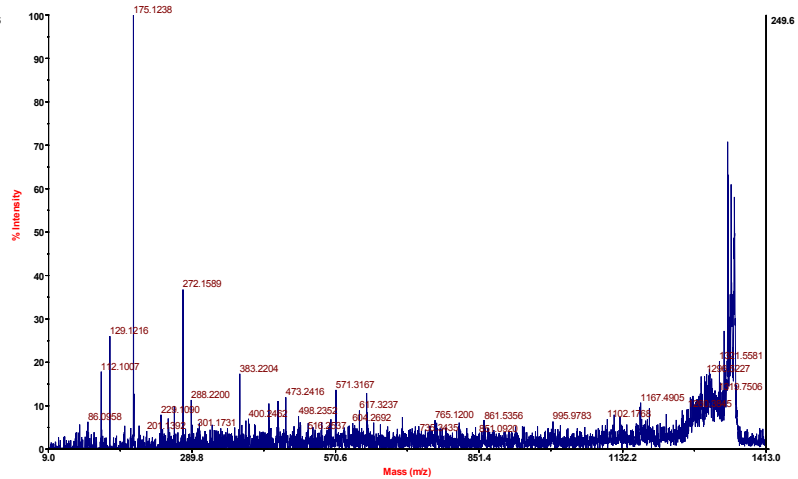

E:\...\C5\_MSMS\_1337.6367\_9.t2d  
Acquired:

4700 MS/MS Precursor 1051.64 Spec #1 MC[BP = 1051.6, 1400]

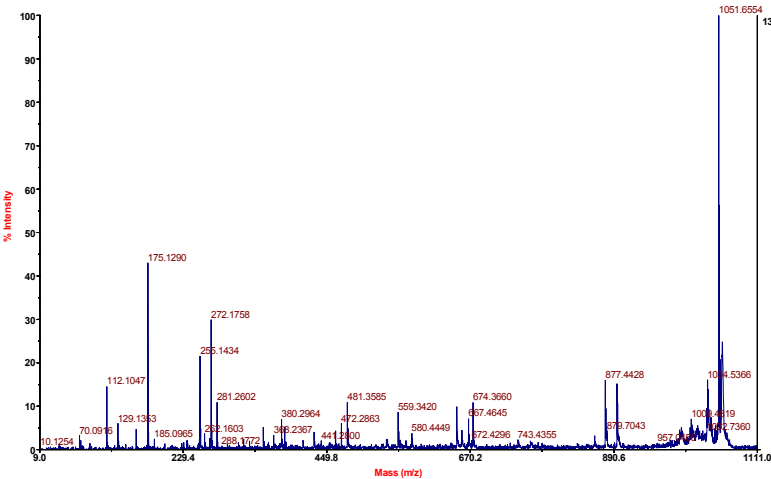

E:\...\C5\_MSMS\_1051.6407\_2.t2d  
Acquired:

4700 MS/MS Precursor 970.42 Spec #1 MC[BP = 175.1, 116]

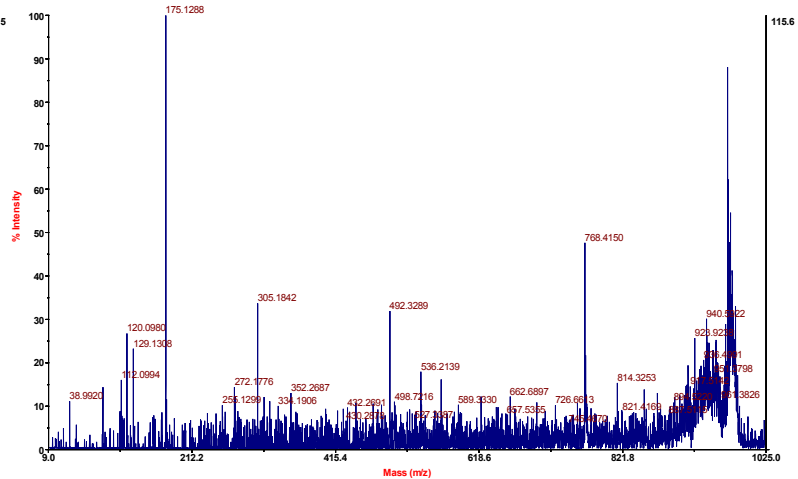

E:\...\C5\_MSMS\_970.4200\_10.t2d  
Acquired:
