# Supplementary material for: Physiological, Ultrastructural and Proteomic Responses in the Leaf of Maize Seedlings to Polyethylene Glycol-Stimulated Severe Water Deficiency
Source: MDPI journal article supplement (doi:10.3390/ijms160921606), 2015-09-08

4700 MS/MS Precursor 1546.71 Spec #1 MC[BP = 175.1, 368]

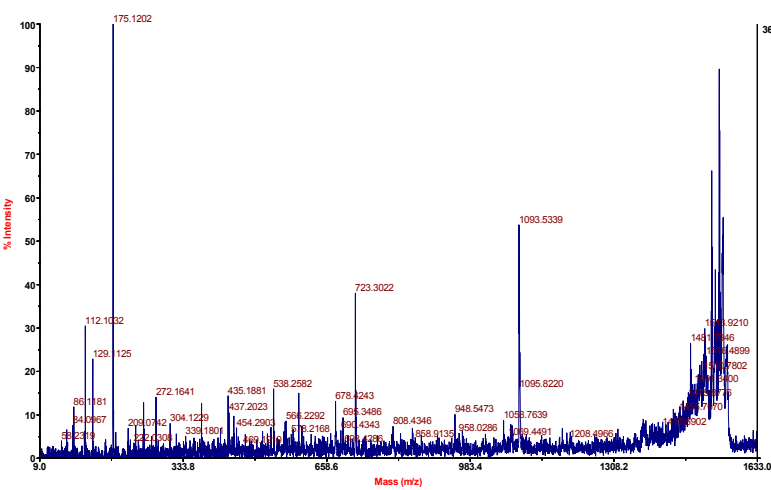

E:\...\C12\_MSMS\_1546.7107\_10.t2d

Acquired:

4700 MS/MS Precursor 1374.68 Spec #1 MC[BP = 175.1, 628]

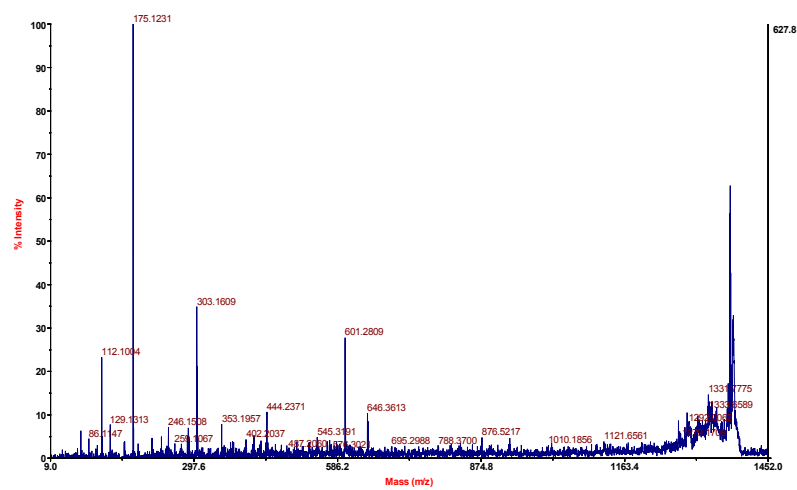

E:\...\C12\_MSMS\_1374.6779\_11.t2d

Acquired:

4700 MS/MS Precursor 1287.67 Spec #1 MC[BP = 1287.7, 5008]

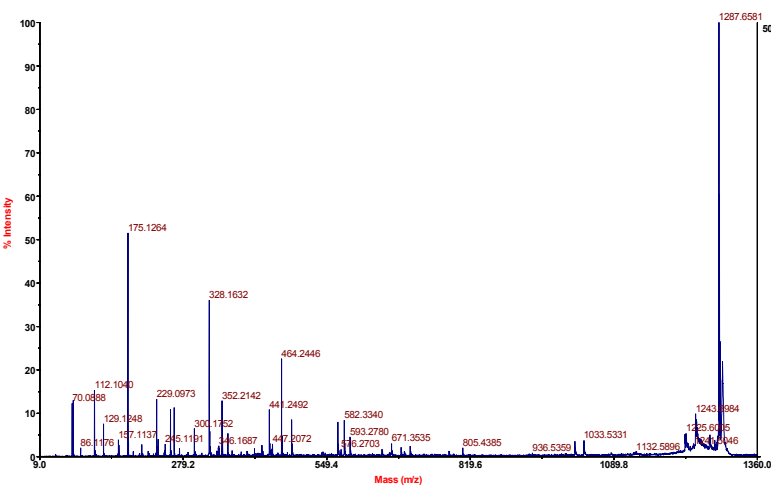

E:\...\C12\_MSMS\_1287.6691\_2.t2d

Acquired:

4700 MS/MS Precursor 1245.67 Spec #1 MC[BP = 1245.7, 1001]

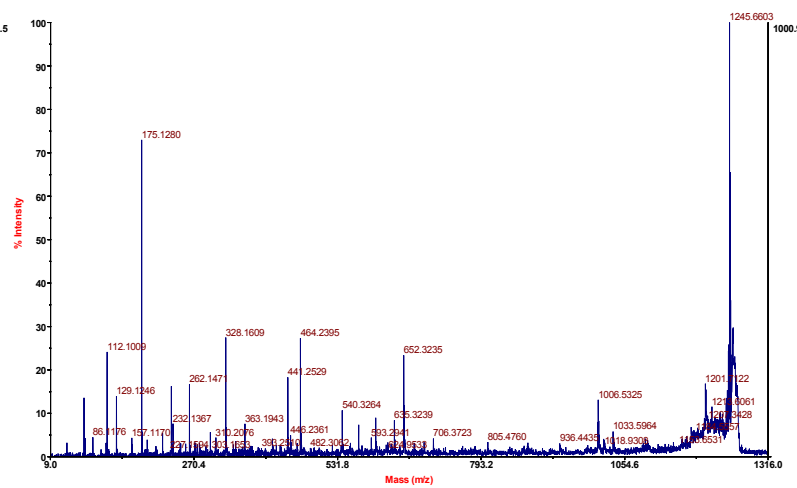

E:\...\C12\_MSMS\_1245.6653\_7.t2d

Acquired:

4700 MS/MS Precursor 1080.59 Spec #1 MC[BP = 1080.6, 1134]

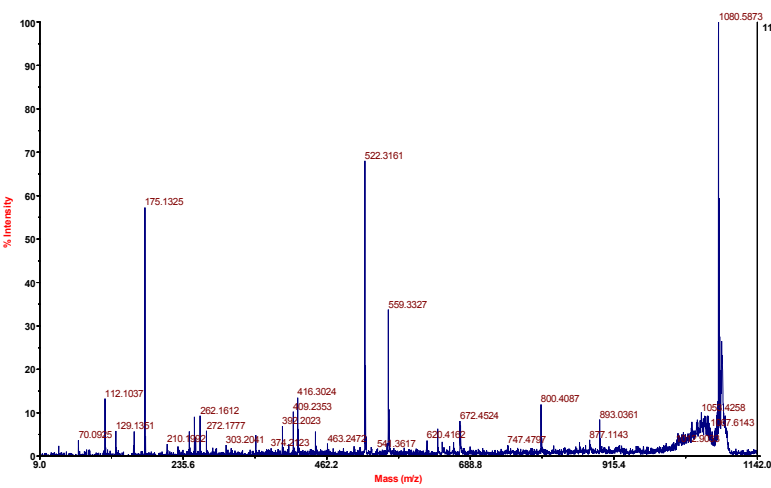

E:\...\C12\_MSMS\_1080.5919\_9.t2d

Acquired:

4700 MS/MS Precursor 1051.68 Spec #1 MC[BP = 1051.7, 3671]

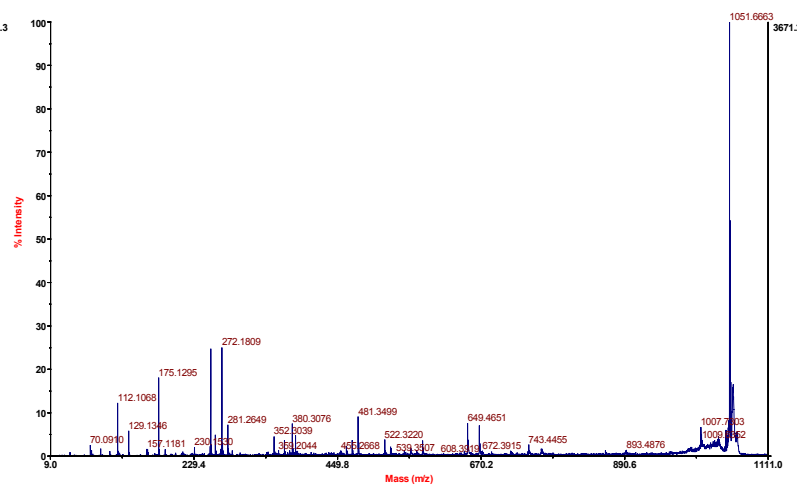

Supplement: s1 [file s1]
