# Supplementary material for: Physiological, Ultrastructural and Proteomic Responses in the Leaf of Maize Seedlings to Polyethylene Glycol-Stimulated Severe Water Deficiency
Source: MDPI journal article supplement (doi:10.3390/ijms160921606), 2015-09-08
Supplement: s1 [file s1]

4700 MS/MS Precursor 1156.53 Spec #1 MC[BP = 1156.5, 1441]

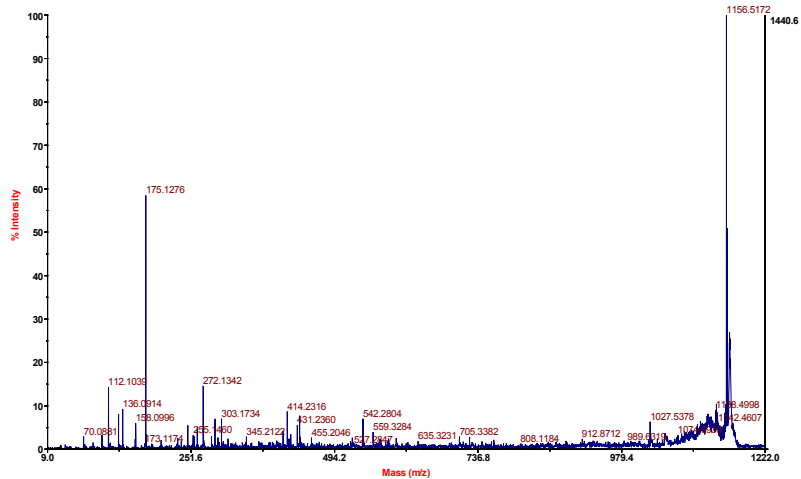

E:\...\C11\_MSMS\_1156.5275\_4.t2d

Acquired:

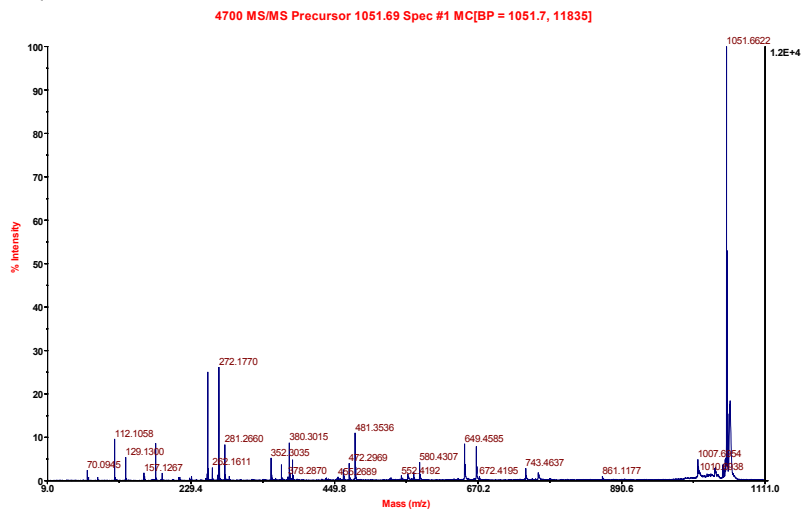

E:\...\C11\_MSMS\_1051.6863\_2.t2d

Acquired:

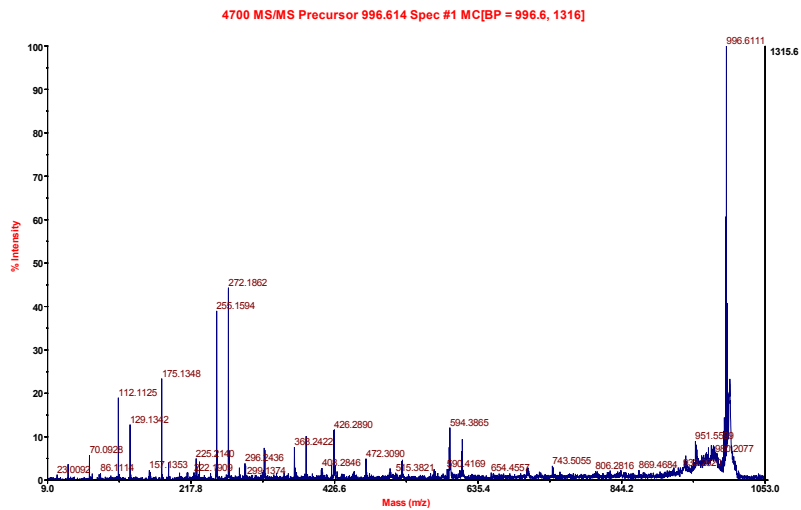

E:\...\C11\_MSMS\_996.6144\_7.t2d

Acquired:

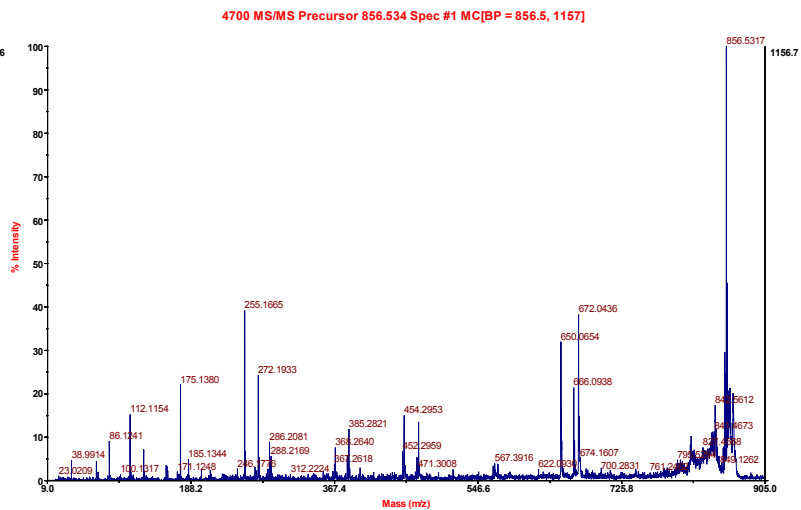

E:\...\C11\_MSMS\_856.5344\_8.t2d

Acquired:
