# Supplementary material for: Physiological, Ultrastructural and Proteomic Responses in the Leaf of Maize Seedlings to Polyethylene Glycol-Stimulated Severe Water Deficiency
Source: MDPI journal article supplement (doi:10.3390/ijms160921606), 2015-09-08
Supplement: s1 [file s1]

4700 MS/MS Precursor 1674.91 Spec #1 MC[BP = 1631.9, 380]

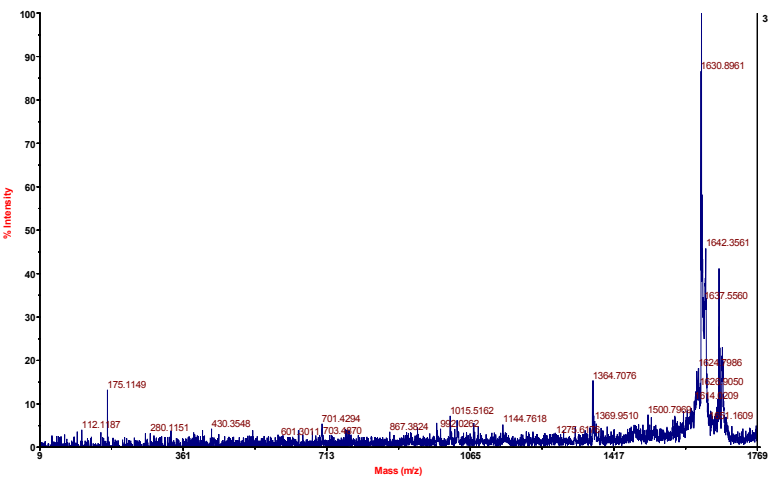

E:\...\D1\_MSMS\_1674.9070\_10.t2d

Acquired:

4700 MS/MS Precursor 1477.72 Spec #1 MC[BP = 1473.8, 832]

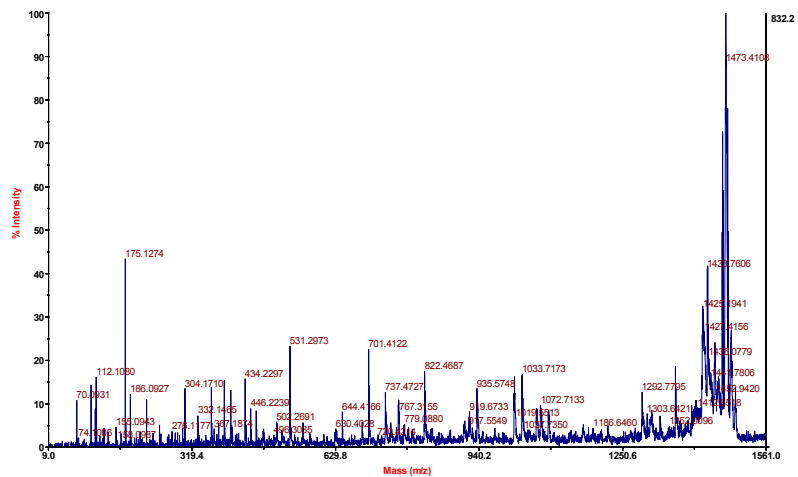

E:\...\D1\_MSMS\_1477.7185\_9.t2d

Acquired:

4700 MS/MS Precursor 1465.72 Spec #1 MC[BP = 1465.7, 13343]

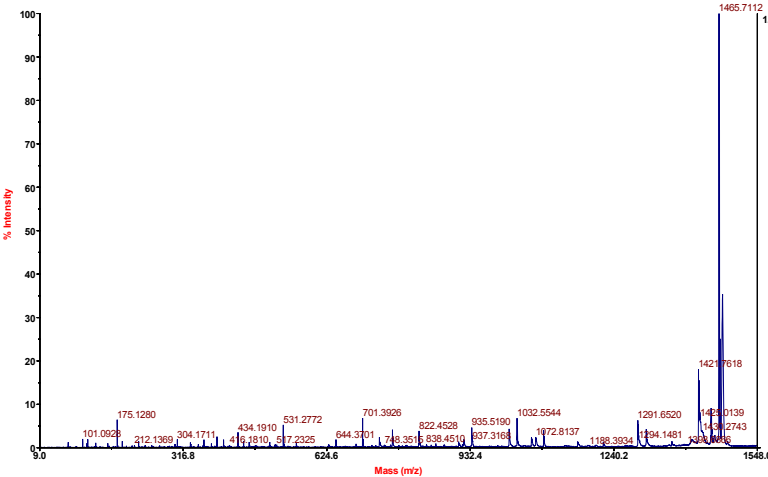

E:\...\D1\_MSMS\_1465.7208\_2.t2d

Acquired:

4700 MS/MS Precursor 1407.63 Spec #1 MC[BP = 766.4, 4649]

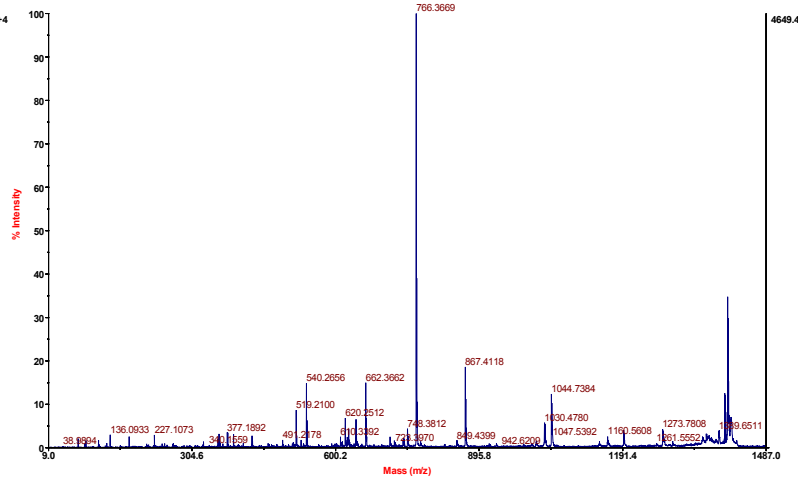

E:\...\D1\_MSMS\_1407.6305\_4.t2d

Acquired:

4700 MS/MS Precursor 1354.71 Spec #1 MC[BP = 1354.7, 1276]

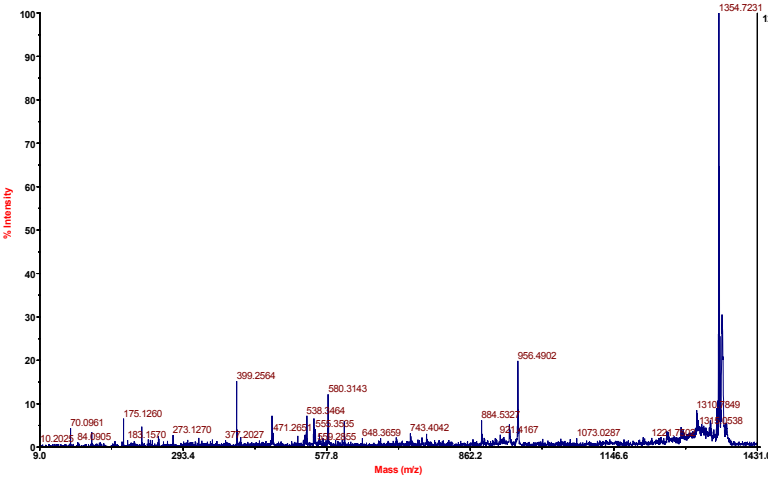

E:\...\D1\_MSMS\_1354.7091\_7.t2d

Acquired:

4700 MS/MS Precursor 1033.51 Spec #1 MC[BP = 1033.5, 518]

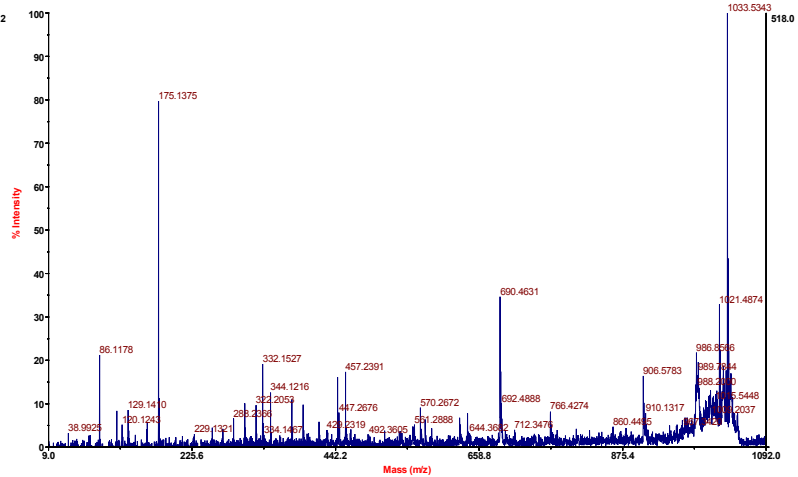

E:\...\D1\_MSMS\_1033.5090\_11.t2d

Acquired:

4700 MS/MS Precursor 1021.51 Spec #1 MC[BP = 1021.5, 17820]

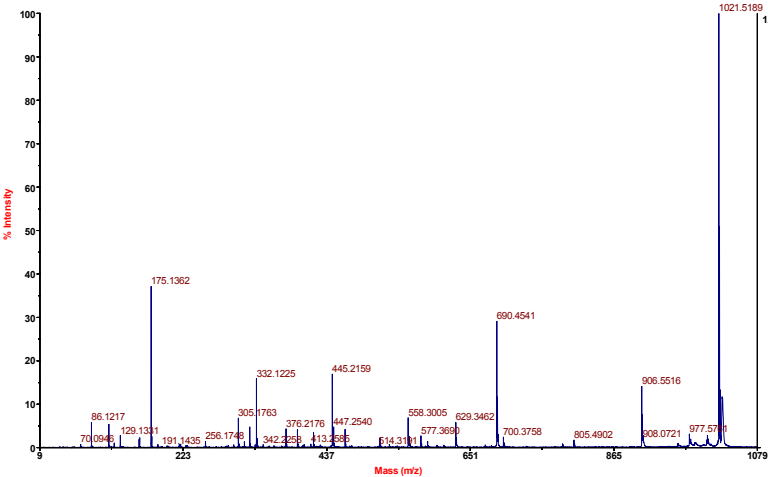

E:\...\D1\_MSMS\_1021.5063\_3.t2d

Acquired:

4700 MS/MS Precursor 985.565 Spec #1 MC[BP = 985.6, 5122]

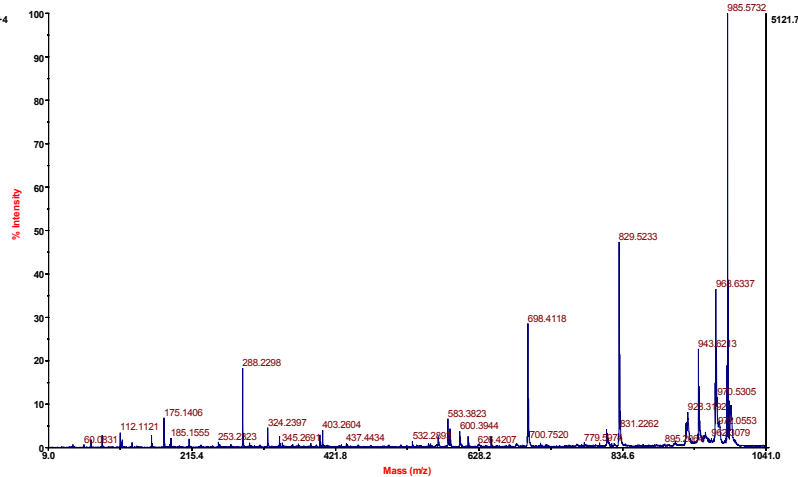

E:\...\D1\_MSMS\_985.5645\_5.t2d

Acquired:
