# Supplementary material for: Physiological, Ultrastructural and Proteomic Responses in the Leaf of Maize Seedlings to Polyethylene Glycol-Stimulated Severe Water Deficiency
Source: MDPI journal article supplement (doi:10.3390/ijms160921606), 2015-09-08
Supplement: s1 [file s1]

4700 MS/MS Precursor 1498.63 Spec #1 MC[BP = 175.1, 520]

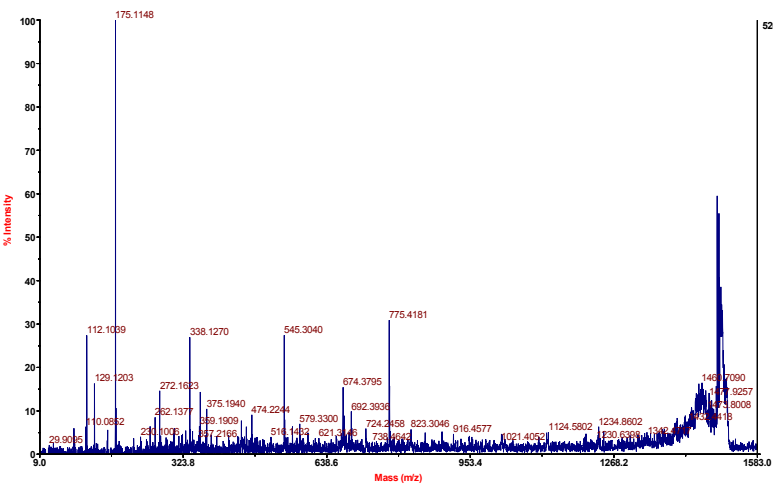

E:\...C4\_MSMS\_1498.6270\_11.t2d

Acquired:

4700 MS/MS Precursor 1446.64 Spec #1 MC[BP = 175.1, 2055]

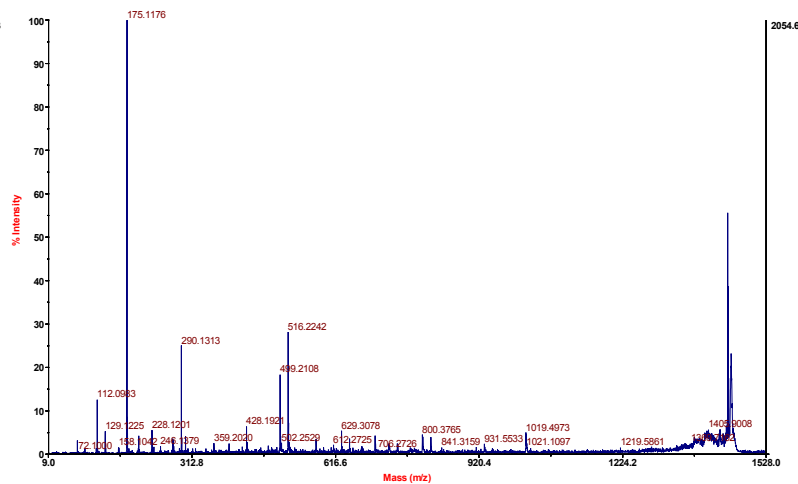

E:\...C4\_MSMS\_1446.6442\_4.t2d

Acquired:

4700 MS/MS Precursor 1397.66 Spec #1 MC[BP = 1397.7, 1160]

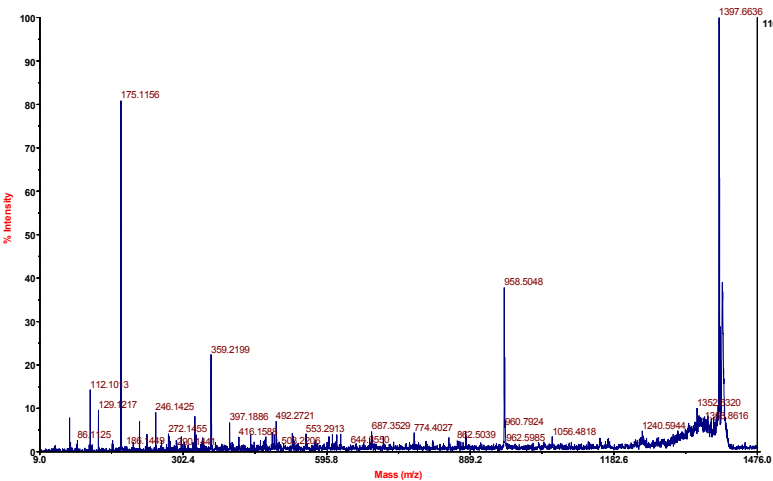

E:\...C4\_MSMS\_1397.6580\_5.t2d

Acquired:

4700 MS/MS Precursor 1374.62 Spec #1 MC[BP = 1374.6, 925]

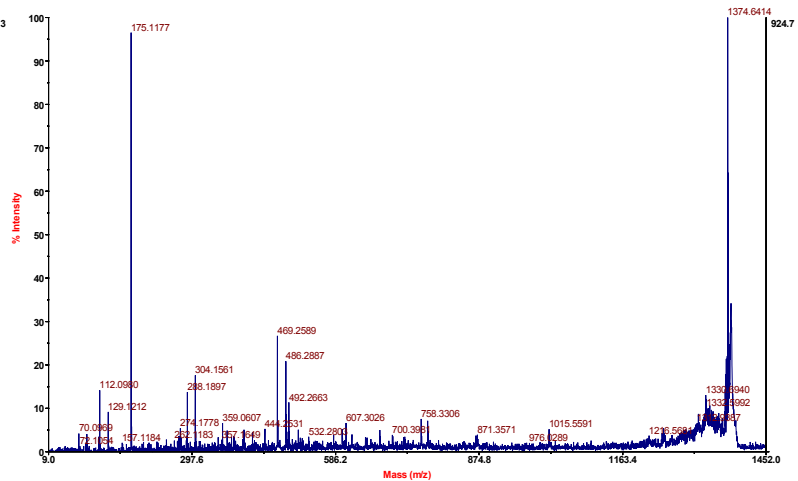

E:\...C4\_MSMS\_1374.6179\_6.t2d

Acquired:

4700 MS/MS Precursor 1208.54 Spec #1 MC[BP = 175.1, 886]

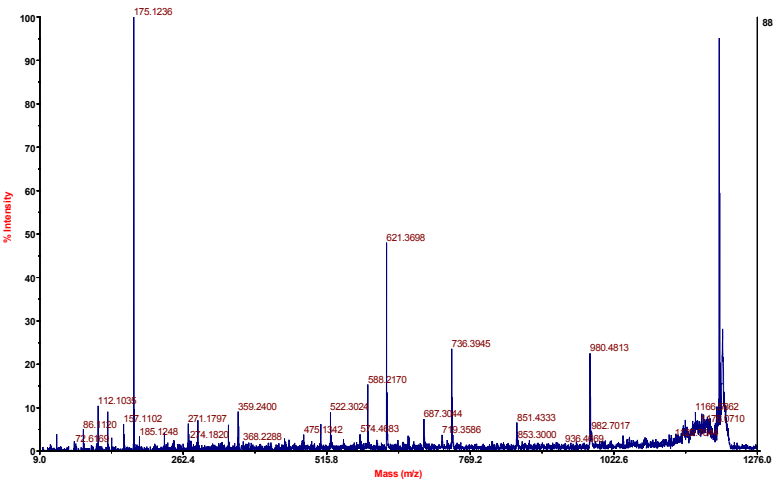

E:\...C4\_MSMS\_1208.5393\_8.t2d

Acquired:

4700 MS/MS Precursor 1078.59 Spec #1 MC[BP = 175.1, 621]

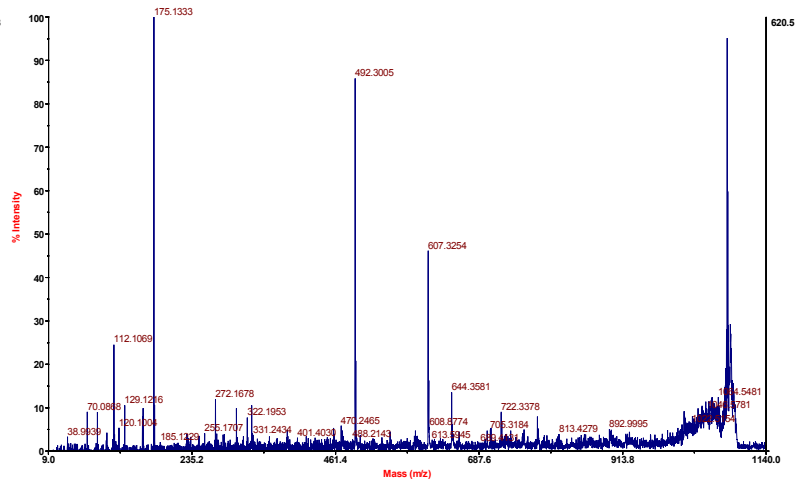

E:\...C4\_MSMS\_1078.5856\_7.t2d

Acquired:

4700 MS/MS Precursor 1065.58 Spec #1 MC[BP = 1066.5, 507]

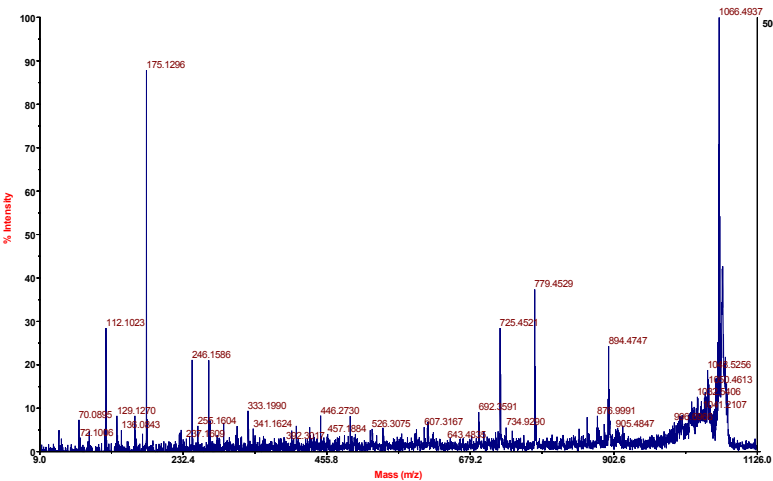

E:\...C4\_MSMS\_1065.5833\_9.t2d

Acquired:

4700 MS/MS Precursor 869.443 Spec #1 MC[BP = 869.4, 5969]

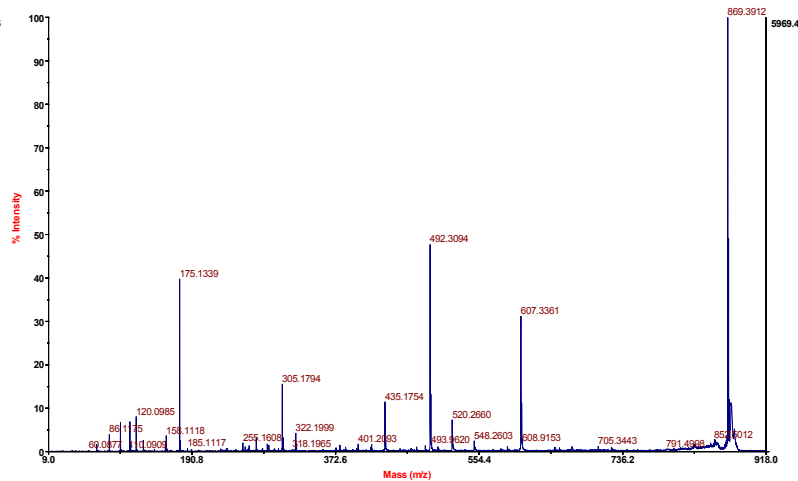

E:\...C4\_MSMS\_869.4431\_3.t2d

Acquired:
