# Supplementary material for: Physiological, Ultrastructural and Proteomic Responses in the Leaf of Maize Seedlings to Polyethylene Glycol-Stimulated Severe Water Deficiency
Source: MDPI journal article supplement (doi:10.3390/ijms160921606), 2015-09-08
Supplement: s1 [file s1]

4700 MS/MS Precursor 2177.11 Spec #1 MC[BP = 175.1, 518]

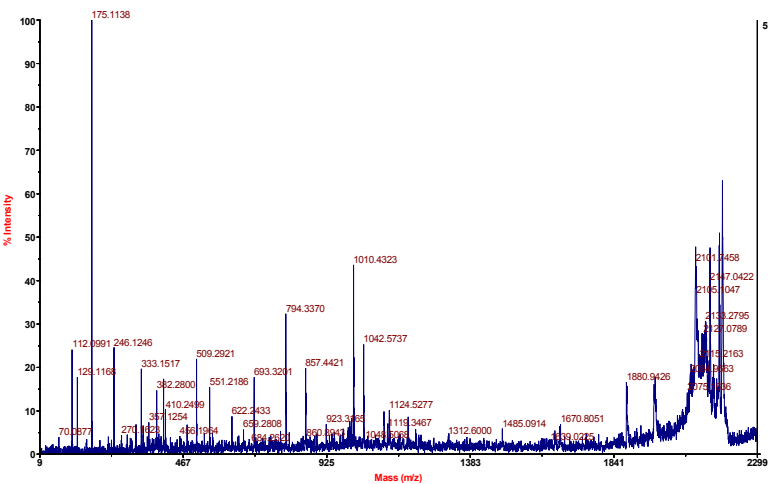

E:\...D5\_MSMS\_2177.1113\_11.t2d

Acquired:

4700 MS/MS Precursor 2099.05 Spec #1 MC[BP = 1042.6, 4390]

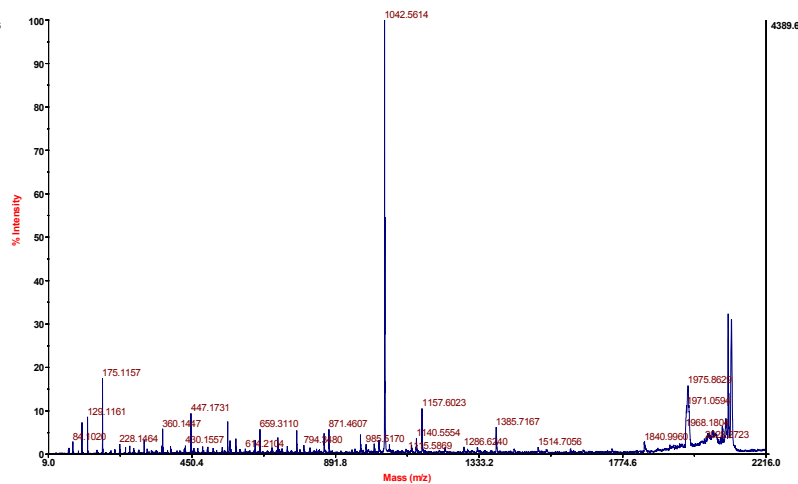

E:\...D5\_MSMS\_2099.0527\_5.t2d

Acquired:

4700 MS/MS Precursor 1967.92 Spec #1 MC[BP = 1967.9, 13992]

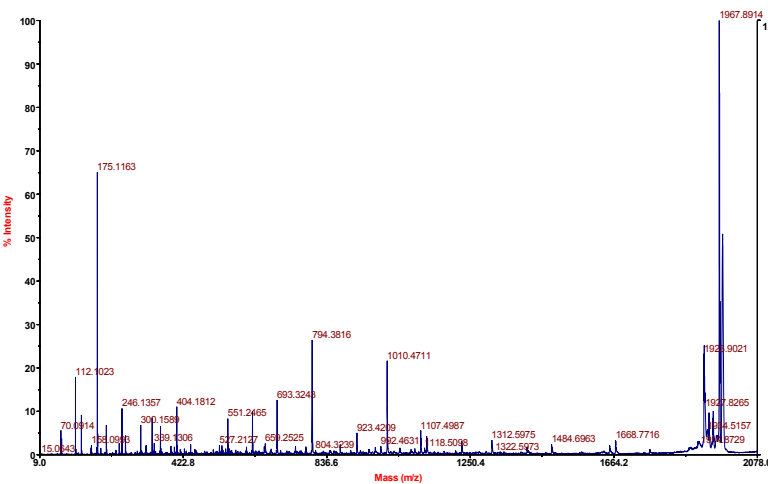

E:\...D5\_MSMS\_1967.9247\_3.t2d

Acquired:

4700 MS/MS Precursor 1613.8 Spec #1 MC[BP = 1042.6, 3409]

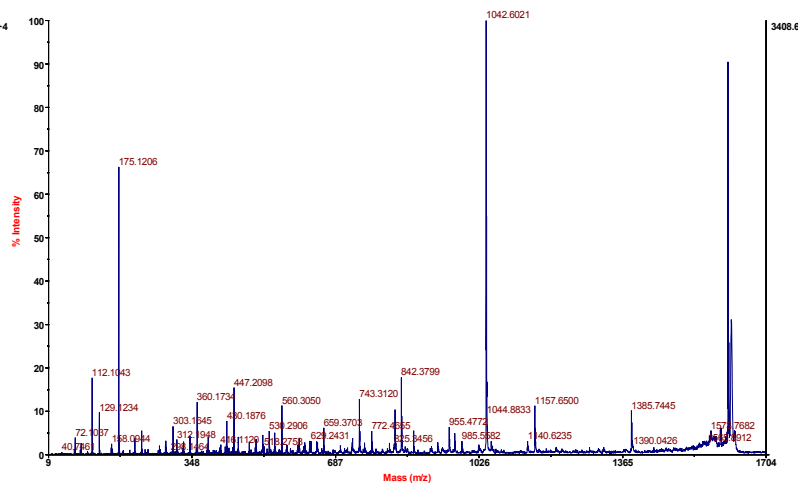

E:\...D5\_MSMS\_1613.7975\_4.t2d

Acquired:

4700 MS/MS Precursor 1183.72 Spec #1 MC[BP = 1183.7, 1735]

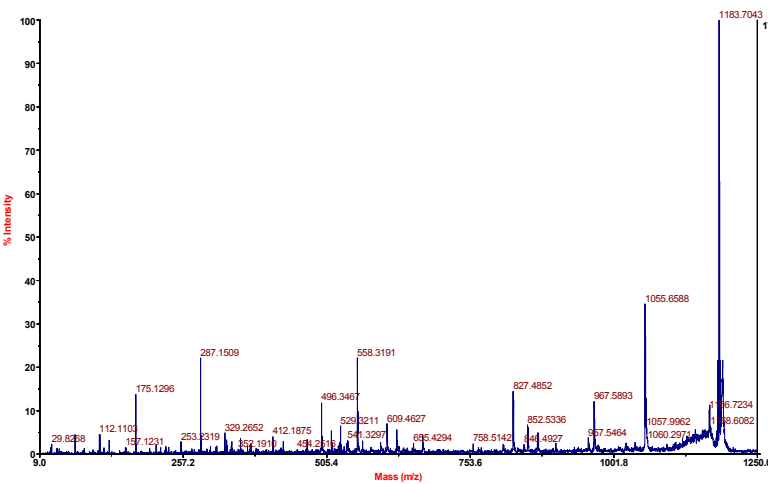

E:\...D5\_MSMS\_1183.7213\_8.t2d

Acquired:

4700 MS/MS Precursor 1003.61 Spec #1 MC[BP = 1003.6, 3453]

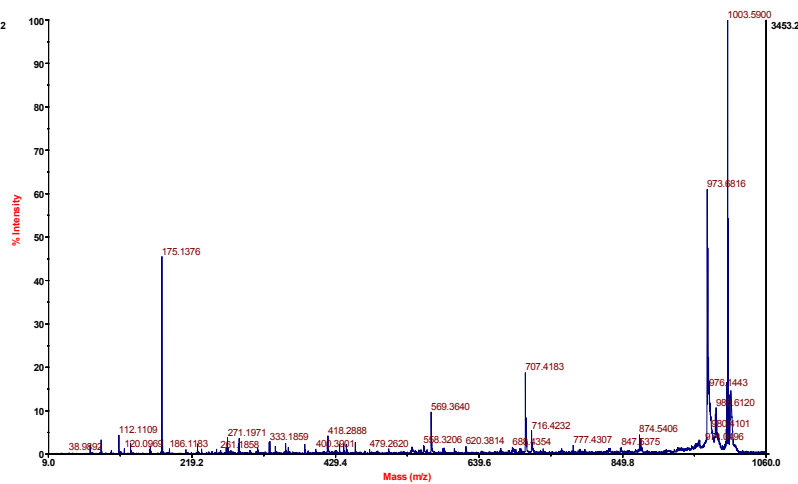

E:\...D5\_MSMS\_1003.6068\_7.t2d

Acquired:

4700 MS/MS Precursor 974.545 Spec #1 MC[BP = 974.5, 12821]

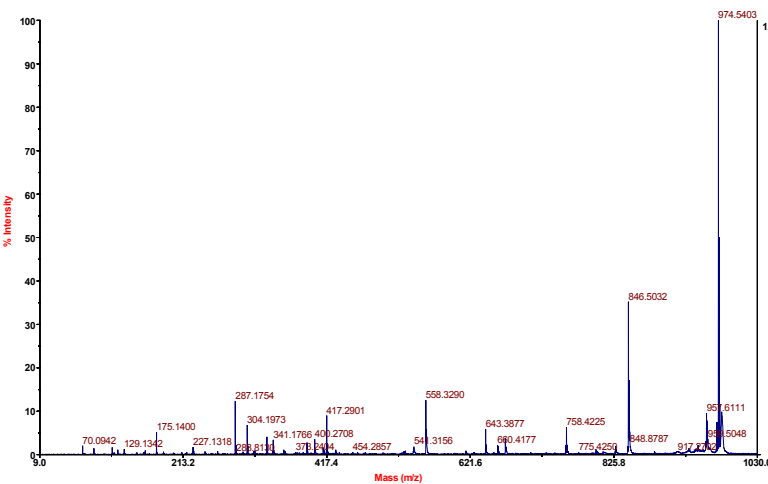

E:\...D5\_MSMS\_974.5447\_6.t2d

Acquired:

4700 MS/MS Precursor 872.556 Spec #1 MC[BP = 872.5, 2347]

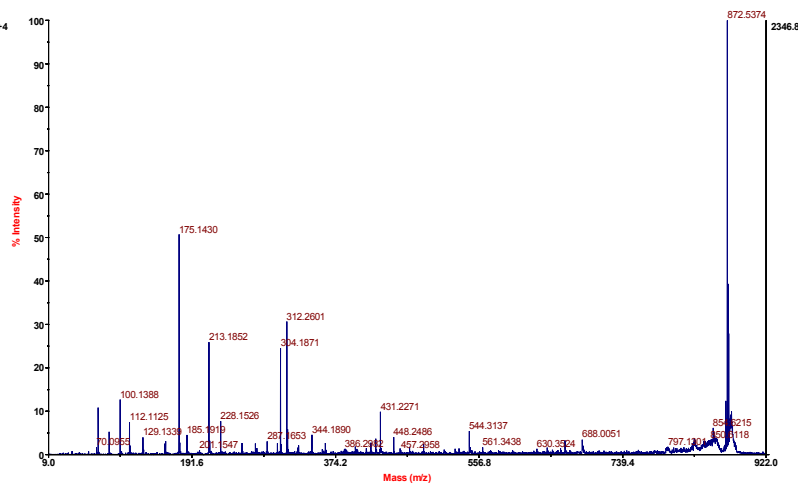

E:\...D5\_MSMS\_872.5558\_10.t2d

Acquired:
