# Supplementary material for: Physiological, Ultrastructural and Proteomic Responses in the Leaf of Maize Seedlings to Polyethylene Glycol-Stimulated Severe Water Deficiency
Source: MDPI journal article supplement (doi:10.3390/ijms160921606), 2015-09-08
Supplement: s1 [file s1]

## Supplementary Information

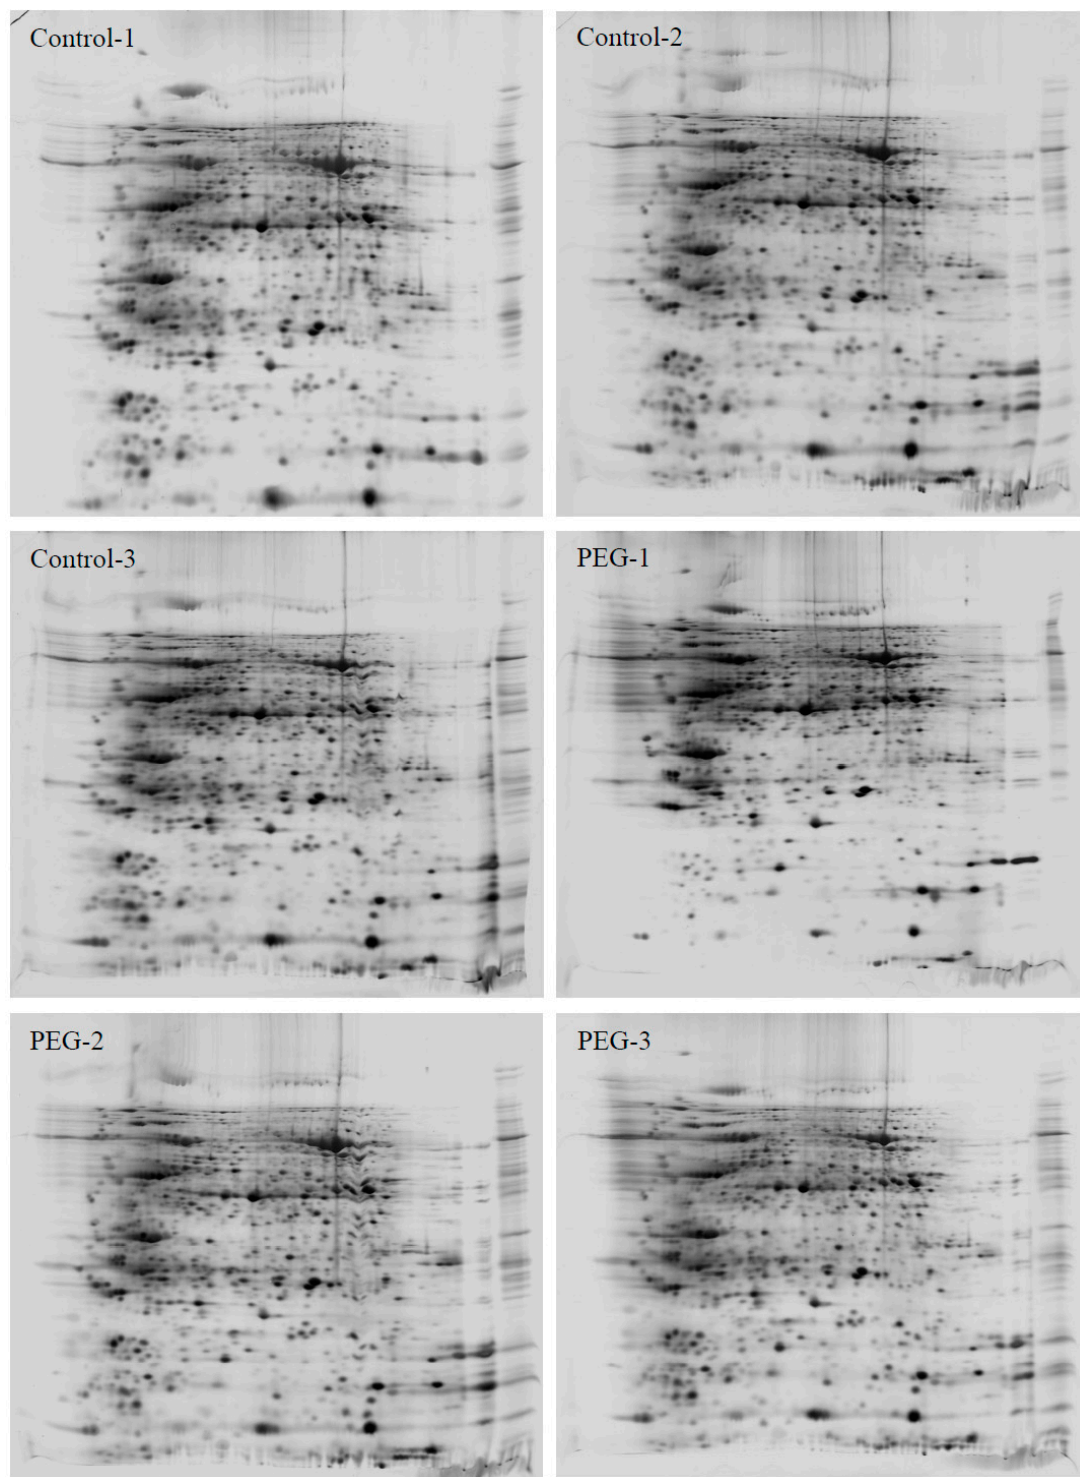

**Figure S1.** Triplicate biological 2-DE gels on the maize leaf proteomes of control and PEG-stimulated water deficiency treatments.
