# Supplementary material for: Physiological, Ultrastructural and Proteomic Responses in the Leaf of Maize Seedlings to Polyethylene Glycol-Stimulated Severe Water Deficiency
Source: MDPI journal article supplement (doi:10.3390/ijms160921606), 2015-09-08
Supplement: s1 [file s1]

4700 MS/MS Precursor 1465.71 Spec #1 MC[BP = 1465.7, 1037]

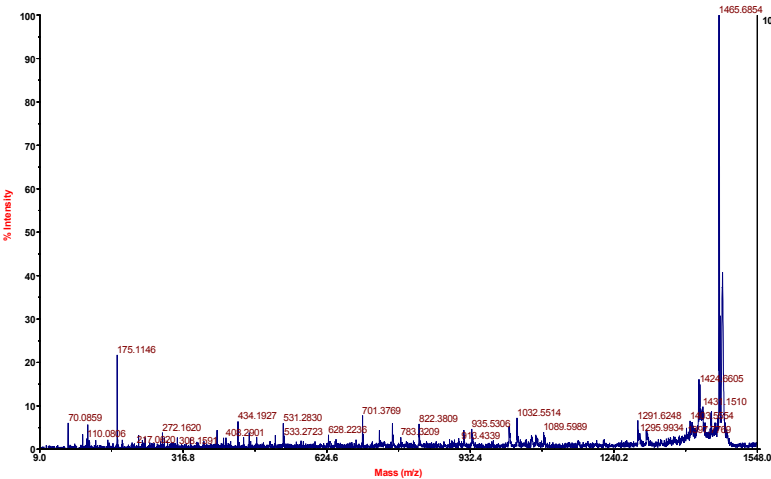

E:\...\C3\_MSMS\_1465.7111\_2.t2d

Acquired:

4700 MS/MS Precursor 1416.74 Spec #1 MC[BP = 1416.7, 259]

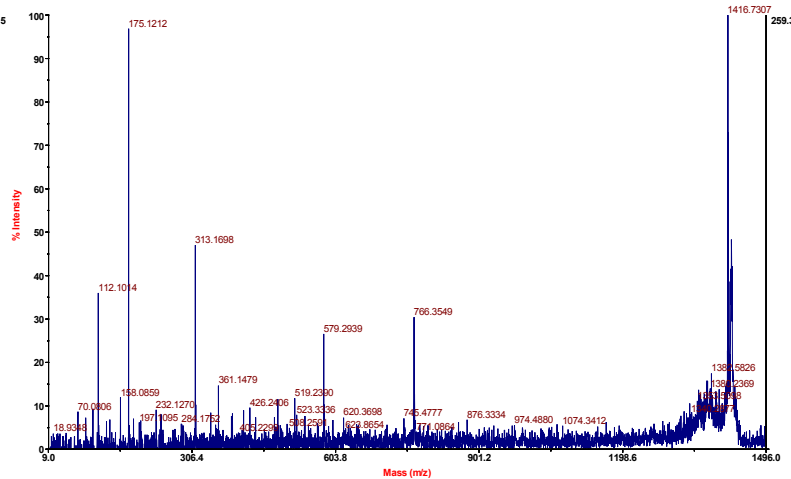

E:\...\C3\_MSMS\_1416.7389\_9.t2d

Acquired:

4700 MS/MS Precursor 1275.68 Spec #1 MC[BP = 175.1, 519]

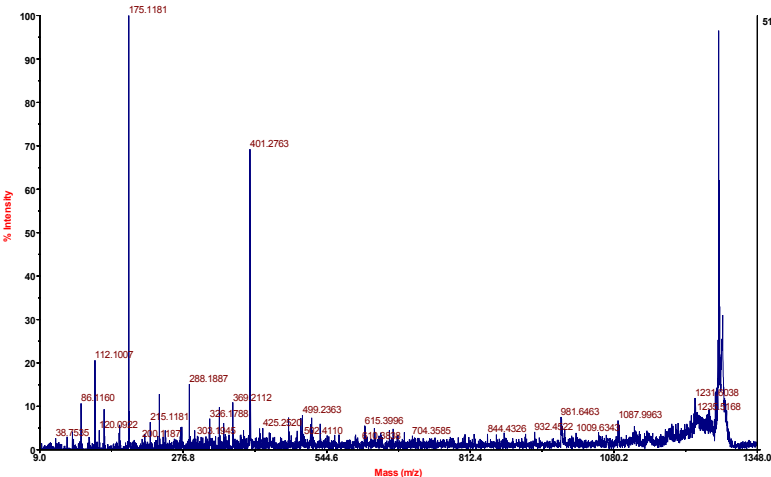

E:\...\C3\_MSMS\_1275.6847\_5.t2d

Acquired:

4700 MS/MS Precursor 1247.6 Spec #1 MC[BP = 175.1, 86]

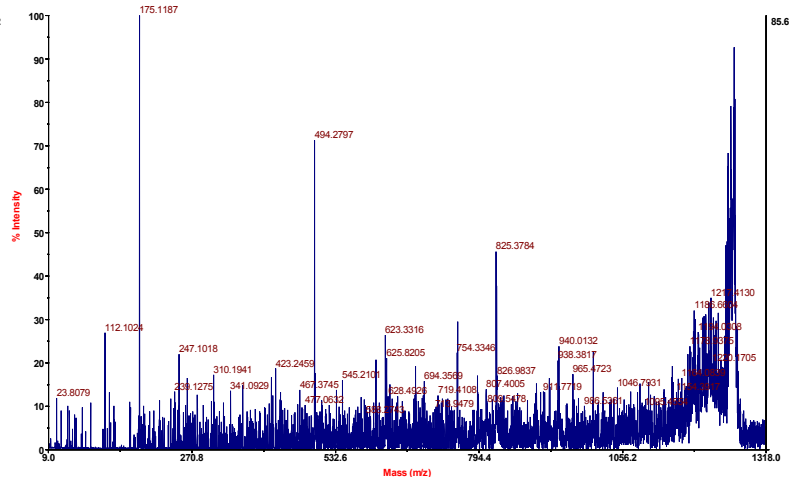

E:\...\C3\_MSMS\_1247.6023\_10.t2d

Acquired:

4700 MS/MS Precursor 1180.56 Spec #1 MC[BP = 175.1, 891]

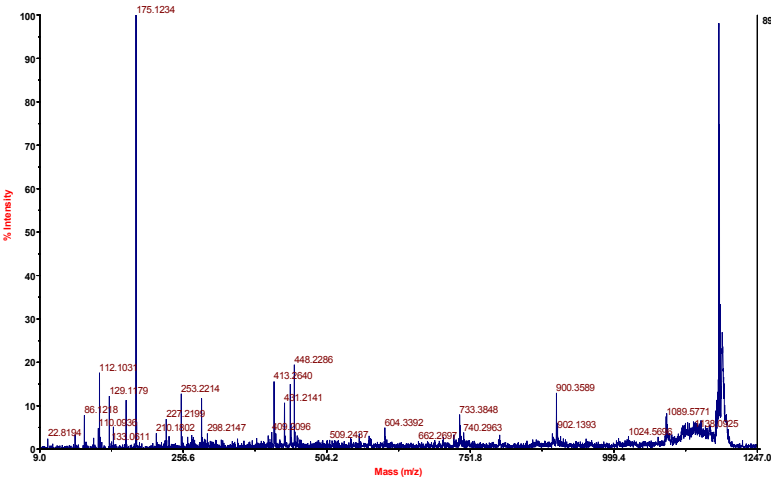

E:\...\C3\_MSMS\_1180.5647\_3.t2d

Acquired:

4700 MS/MS Precursor 1116.55 Spec #1 MC[BP = 1116.6, 493]

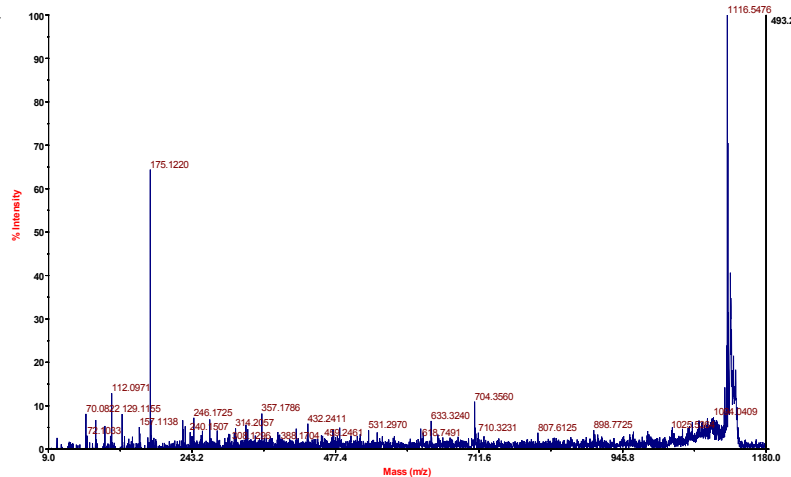

E:\...\C3\_MSMS\_1116.5504\_6.t2d

Acquired:

4700 MS/MS Precursor 1051.66 Spec #1 MC[BP = 1051.6, 427]

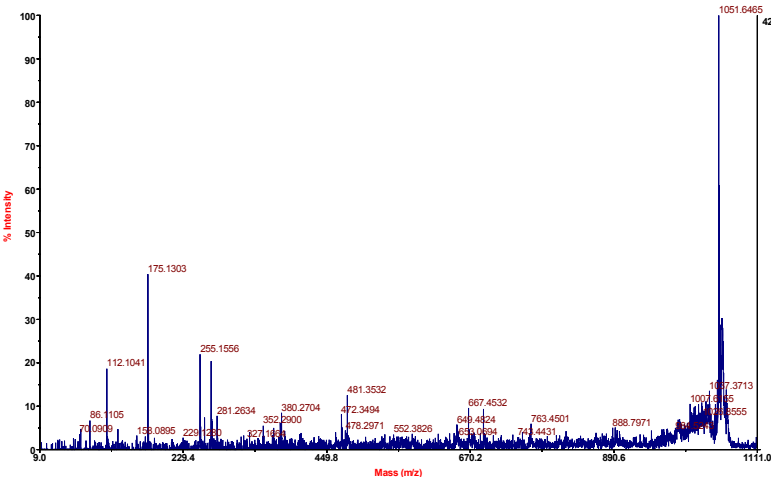

E:\...\C3\_MSMS\_1051.6584\_7.t2d

Acquired:

4700 MS/MS Precursor 1021.51 Spec #1 MC[BP = 1021.5, 794]

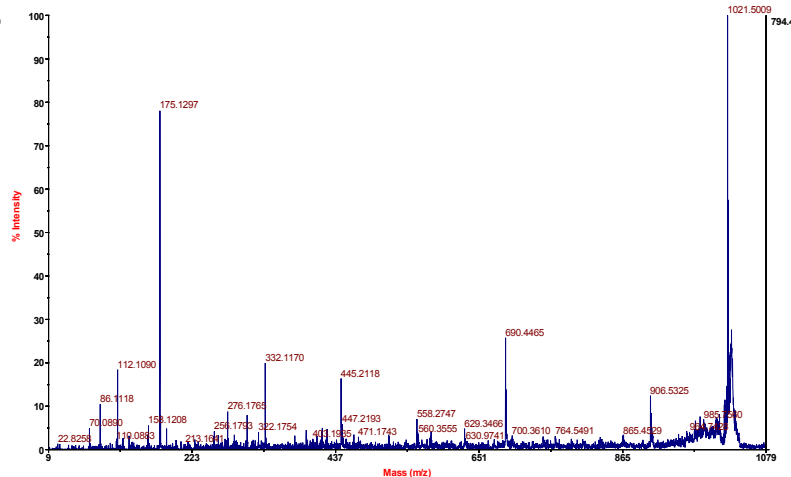

E:\...\C3\_MSMS\_1021.5083\_4.t2d

Acquired:
