# Supplementary material for: Physiological, Ultrastructural and Proteomic Responses in the Leaf of Maize Seedlings to Polyethylene Glycol-Stimulated Severe Water Deficiency
Source: MDPI journal article supplement (doi:10.3390/ijms160921606), 2015-09-08
Supplement: s1 [file s1]

4700 MS/MS Precursor 1451.6 Spec #1 MC[BP = 1451.6, 1053]

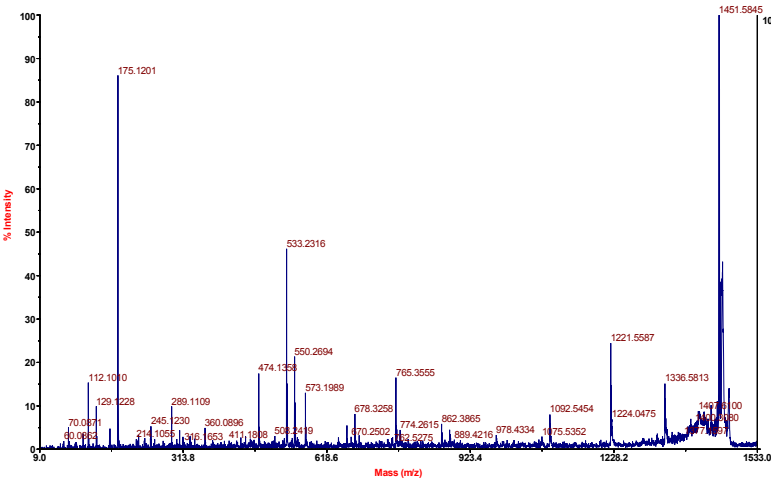

E:\...\C10\_MSMS\_1451.6038\_6.t2d

Acquired:

4700 MS/MS Precursor 1407.65 Spec #1 MC[BP = 766.4, 533]

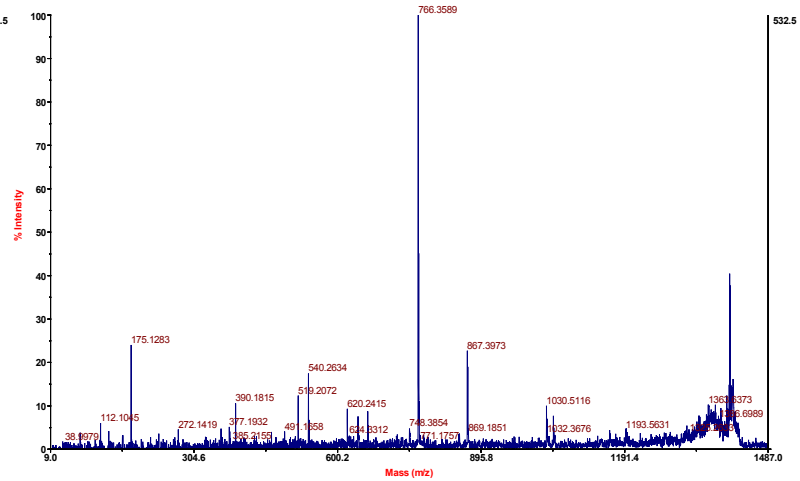

E:\...\C10\_MSMS\_1407.6472\_10.t2d

Acquired:

4700 MS/MS Precursor 1247.6 Spec #1 MC[BP = 1247.6, 282]

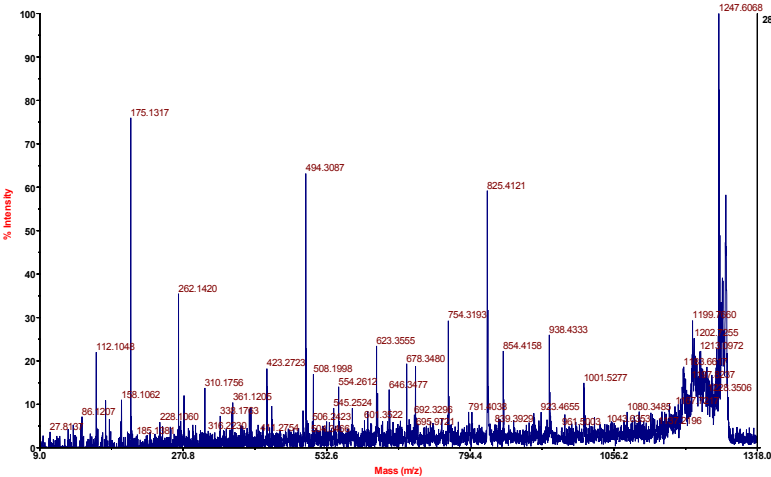

E:\...\C10\_MSMS\_1247.5986\_9.t2d

Acquired:

4700 MS/MS Precursor 1180.58 Spec #1 MC[BP = 1180.6, 2123]

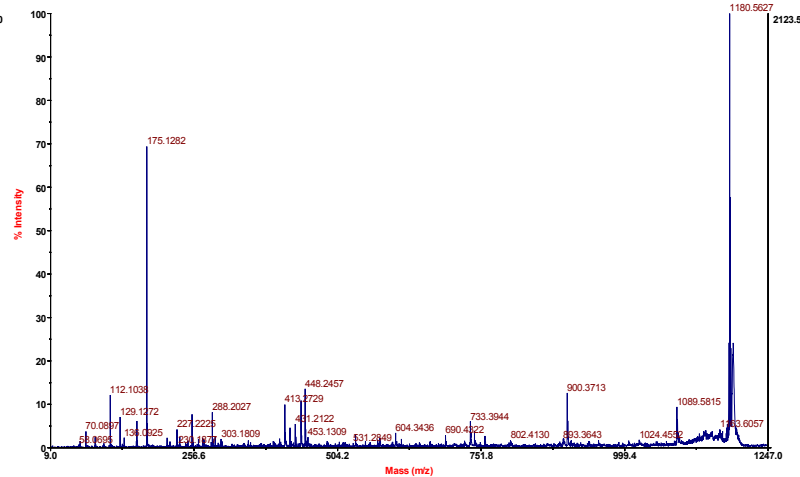

E:\...\C10\_MSMS\_1180.5775\_5.t2d

Acquired:

4700 MS/MS Precursor 1051.68 Spec #1 MC[BP = 1051.7, 2568]

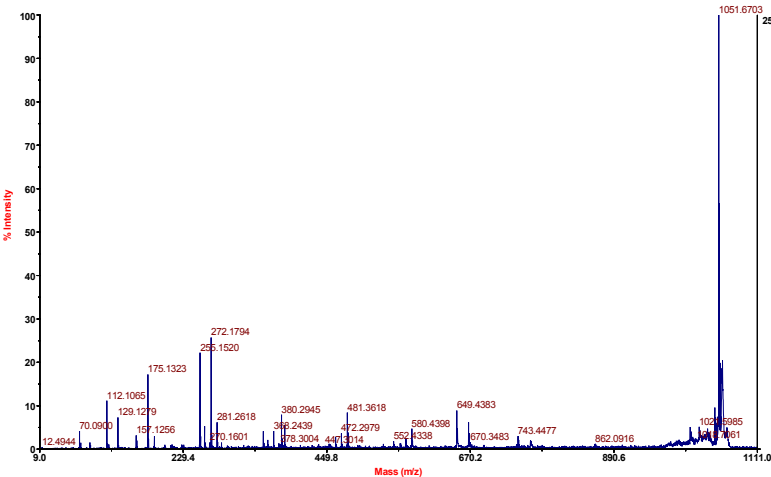

E:\...\C10\_MSMS\_1051.6805\_4.t2d

Acquired:

4700 MS/MS Precursor 1021.52 Spec #1 MC[BP = 1021.5, 5068]

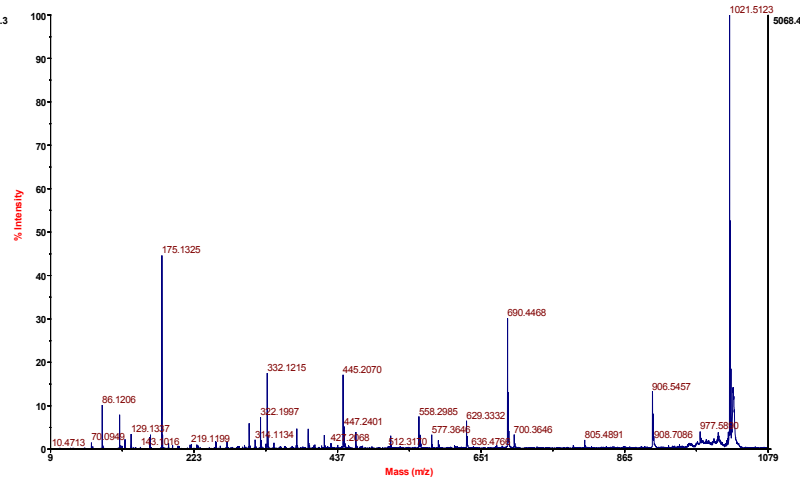

E:\...\C10\_MSMS\_1021.5225\_2.t2d

Acquired:

4700 MS/MS Precursor 971.396 Spec #1 MC[BP = 971.4, 2389]

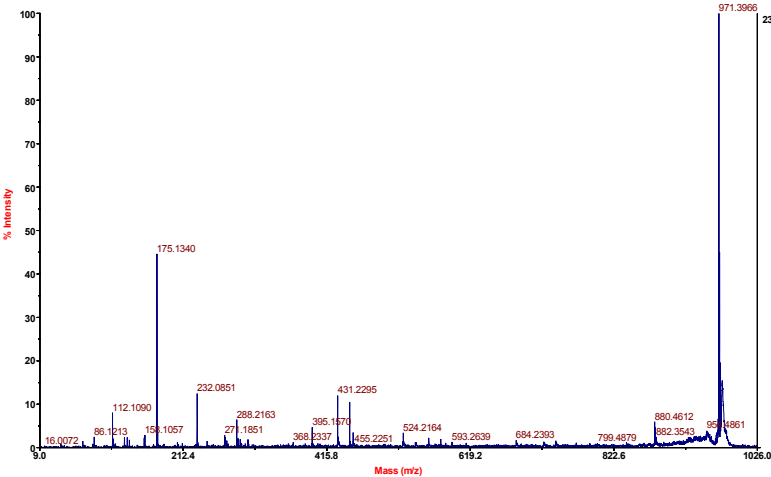

E:\...\C10\_MSMS\_971.3958\_7.t2d

Acquired:

4700 MS/MS Precursor 870.542 Spec #1 MC[BP = 870.6, 2149]

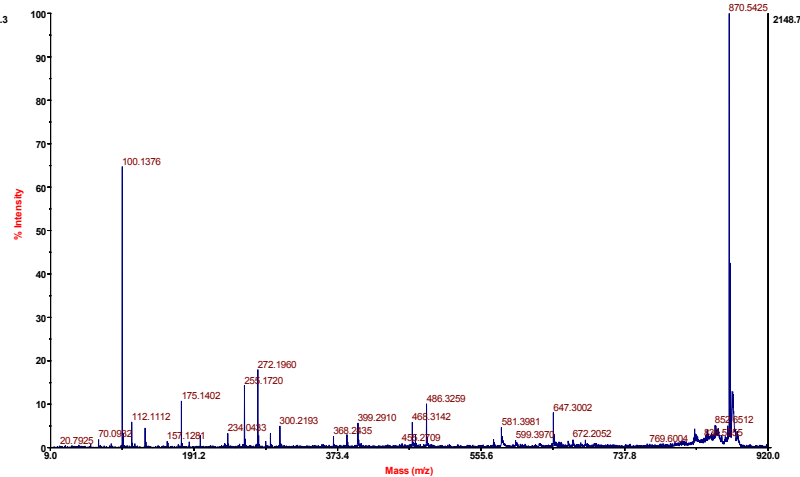

E:\...\C10\_MSMS\_870.5416\_8.t2d

Acquired:
