# Supplementary material for: Physiological, Ultrastructural and Proteomic Responses in the Leaf of Maize Seedlings to Polyethylene Glycol-Stimulated Severe Water Deficiency
Source: MDPI journal article supplement (doi:10.3390/ijms160921606), 2015-09-08

E:\试验数据\2013.5\2D-蛋白\正式实验\P13118项目补充的内容(1)\P13118 spectrumraw\P13118 spectrumraw\MS\Sample test\Sample Project 20130720\D2\_MS\_1.t2d

E:\试验数据\2013.5\2D-蛋白\正式实验\P13118项目补充的内容(1)\P13118 spectrumraw\P13118 spectrumraw\MS\Sample test\Sample Project 20130720\D2\_MS\_1.t2d

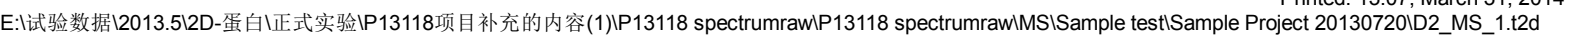

Supplement: s1 [file s1]
