# Supplementary material for: Physiological, Ultrastructural and Proteomic Responses in the Leaf of Maize Seedlings to Polyethylene Glycol-Stimulated Severe Water Deficiency
Source: MDPI journal article supplement (doi:10.3390/ijms160921606), 2015-09-08
Supplement: s1 [file s1]

4700 MS/MS Precursor 2080.84 Spec #1 MC[BP = 417.2, 1043]

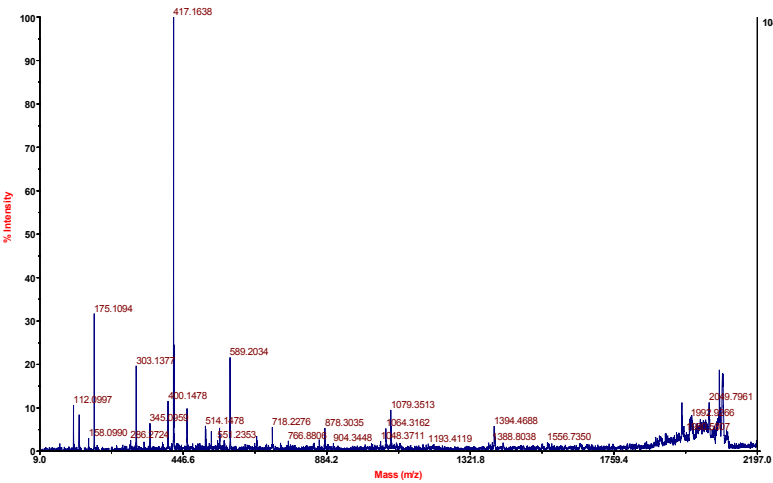

E:\...\C9\_MSMS\_2080.8398\_9.t2d

Acquired:

4700 MS/MS Precursor 2048.86 Spec #1 MC[BP = 417.2, 4573]

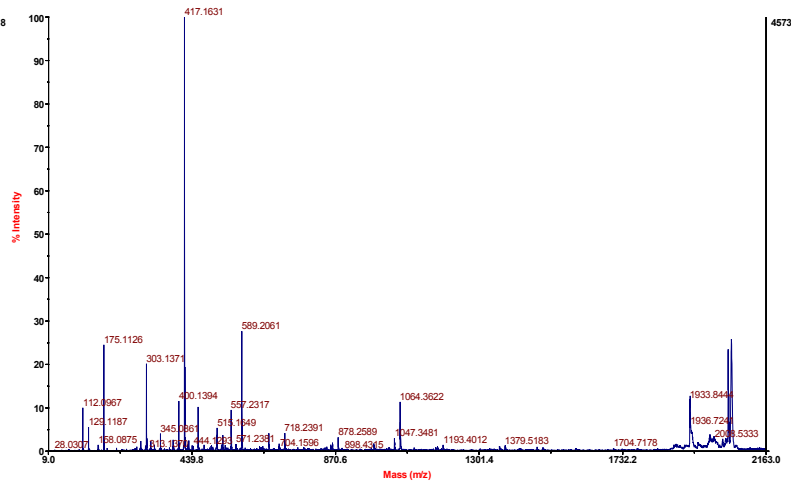

E:\...\C9\_MSMS\_2048.8564\_2.t2d

Acquired:

4700 MS/MS Precursor 1896.83 Spec #1 MC[BP = 1106.5, 1336]

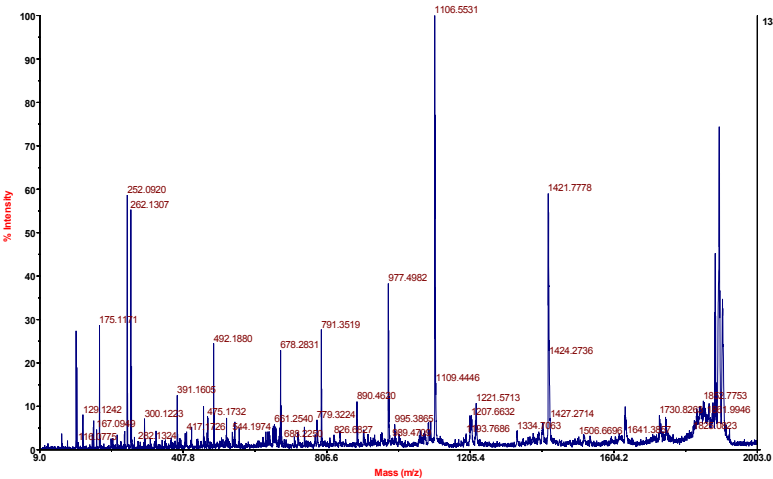

E:\...\C9\_MSMS\_1896.8290\_6.t2d

Acquired:

4700 MS/MS Precursor 1884.82 Spec #1 MC[BP = 1884.8, 1549]

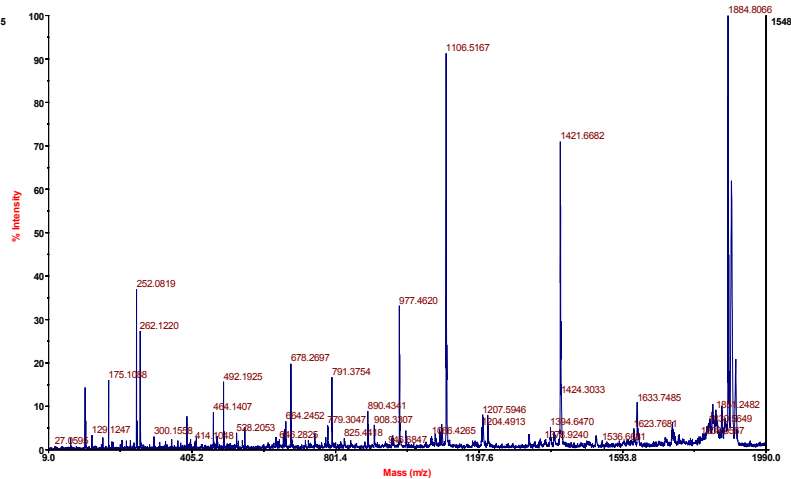

E:\...\C9\_MSMS\_1884.8170\_3.t2d

Acquired:

4700 MS/MS Precursor 1673.83 Spec #1 MC[BP = 853.5, 784]

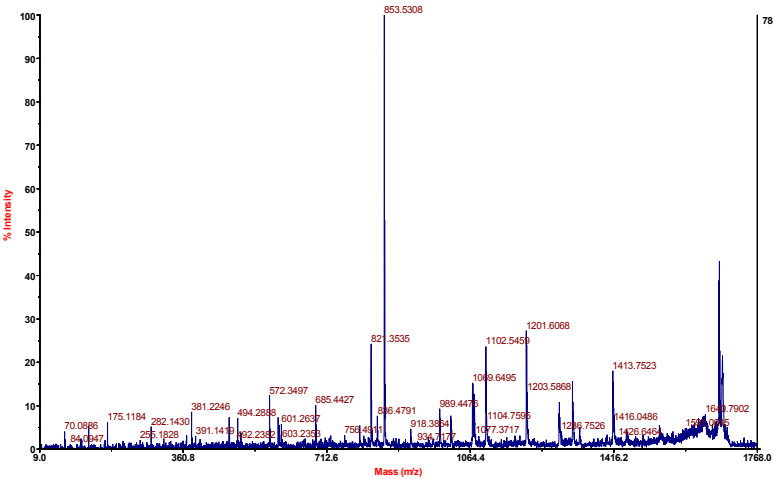

E:\...\C9\_MSMS\_1673.8259\_8.t2d

Acquired:

4700 MS/MS Precursor 1499.63 Spec #1 MC[BP = 1499.7, 1221]

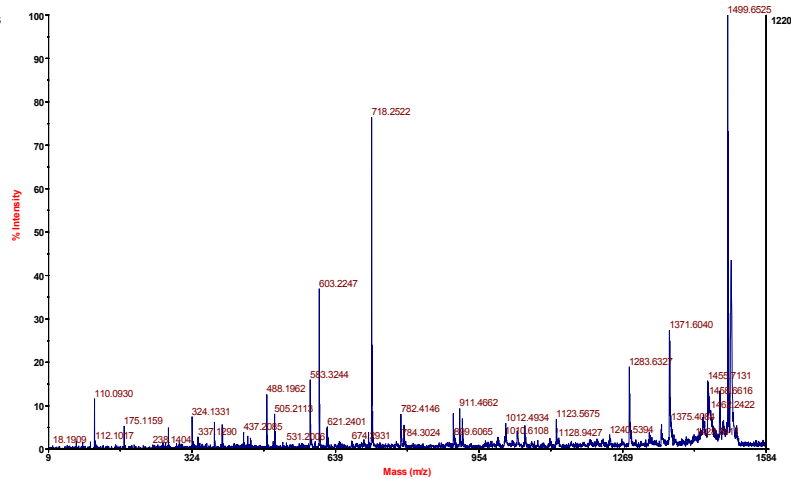

E:\...\C9\_MSMS\_1499.6293\_5.t2d

Acquired:

4700 MS/MS Precursor 1444.73 Spec #1 MC[BP = 1444.8, 836]

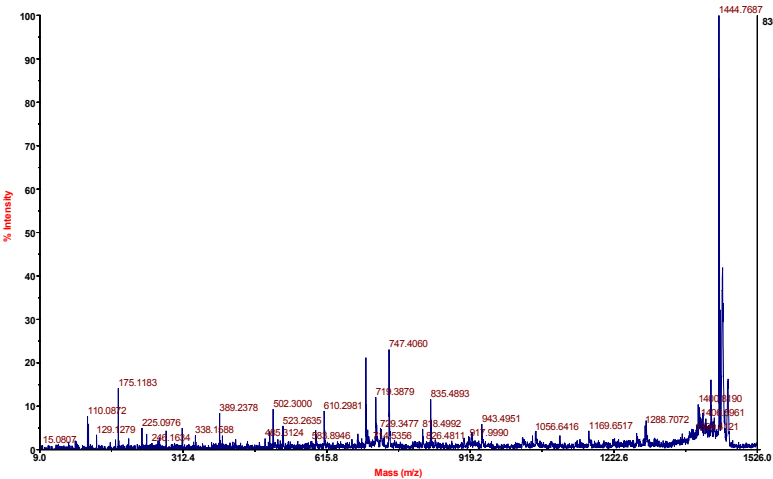

E:\...\C9\_MSMS\_1444.7329\_7.t2d

Acquired:

4700 MS/MS Precursor 1196.55 Spec #1 MC[BP = 1196.5, 808]

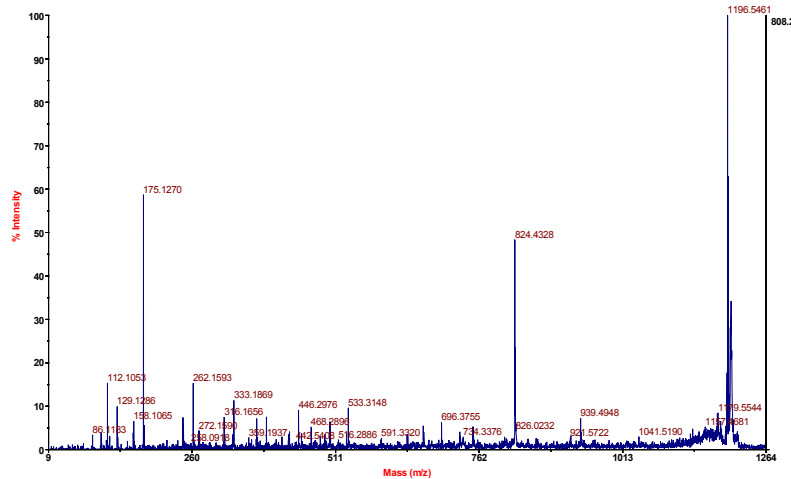

E:\...\C9\_MSMS\_1196.5525\_11.t2d

Acquired:
