# Supplementary material for: Physiological, Ultrastructural and Proteomic Responses in the Leaf of Maize Seedlings to Polyethylene Glycol-Stimulated Severe Water Deficiency
Source: MDPI journal article supplement (doi:10.3390/ijms160921606), 2015-09-08
Supplement: s1 [file s1]

4700 MS/MS Precursor 2359.01 Spec #1 MC[BP = 458.2, 74868]

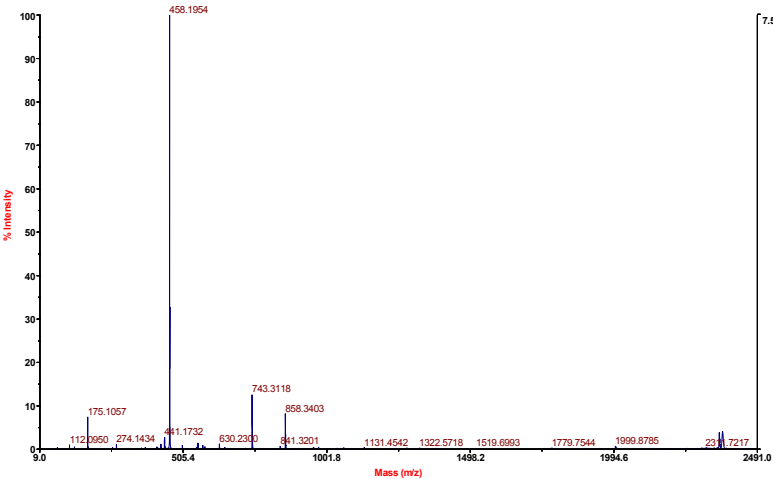

E:\...\C7\_MSMS\_2359.0127\_2.t2d  
Acquired:

4700 MS/MS Precursor 2082.74 Spec #1 MC[BP = 289.1, 1788]

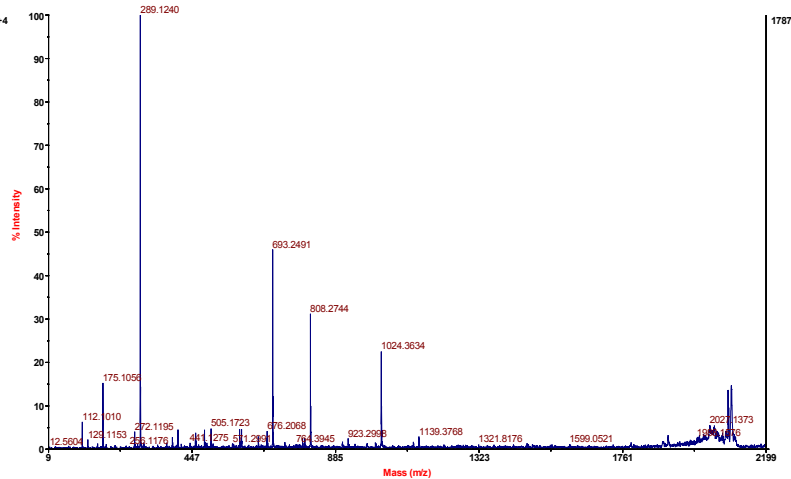

E:\...\C7\_MSMS\_2082.7446\_11.t2d  
Acquired:

4700 MS/MS Precursor 1508.64 Spec #1 MC[BP = 360.2, 7846]

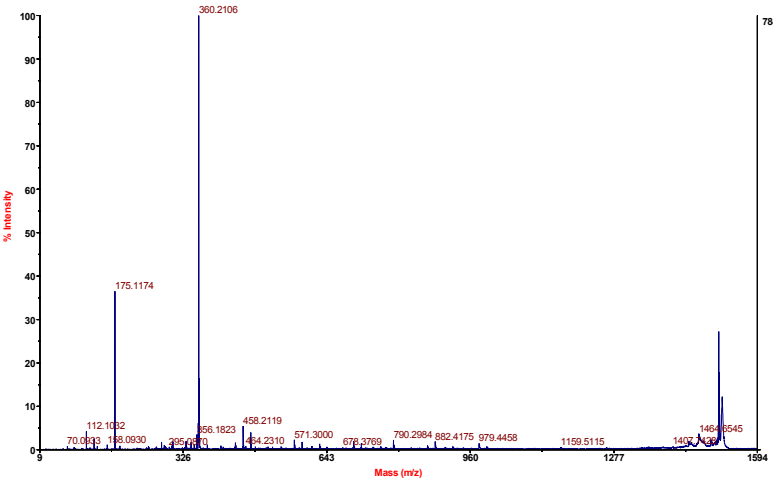

E:\...\C7\_MSMS\_1508.6381\_5.t2d  
Acquired:

4700 MS/MS Precursor 1332.58 Spec #1 MC[BP = 1332.6, 2547]

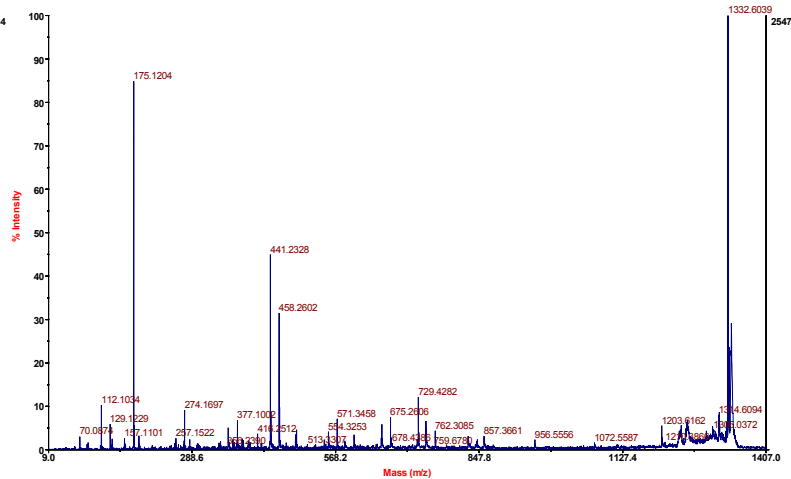

E:\...\C7\_MSMS\_1332.5847\_6.t2d  
Acquired:

4700 MS/MS Precursor 1250.53 Spec #1 MC[BP = 1250.5, 7932]

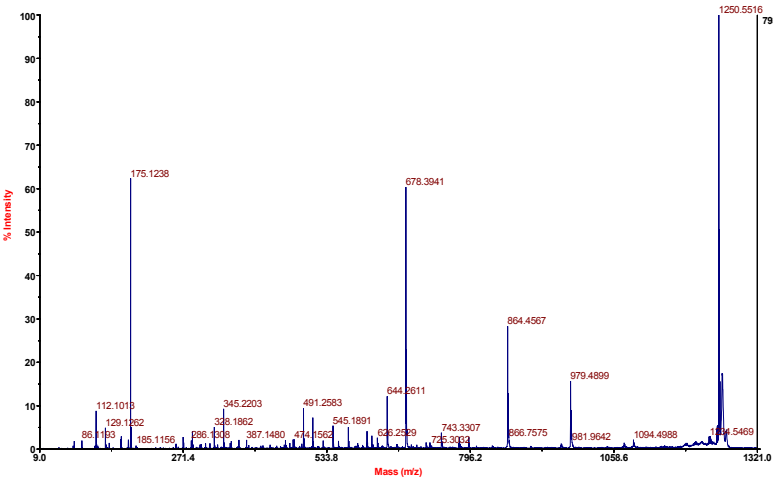

E:\...\C7\_MSMS\_1250.5287\_3.t2d  
Acquired:

4700 MS/MS Precursor 1234.52 Spec #1 MC[BP = 1234.5, 2655]

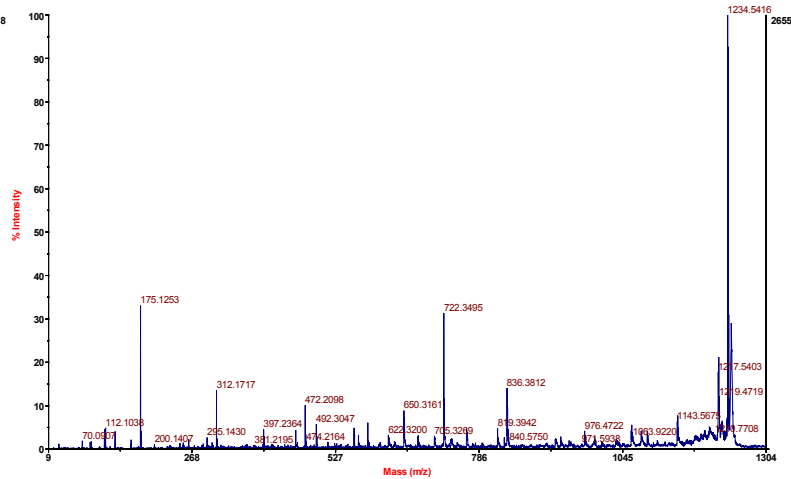

E:\...\C7\_MSMS\_1234.5220\_7.t2d  
Acquired:

4700 MS/MS Precursor 942.506 Spec #1 MC[BP = 942.6, 3487]

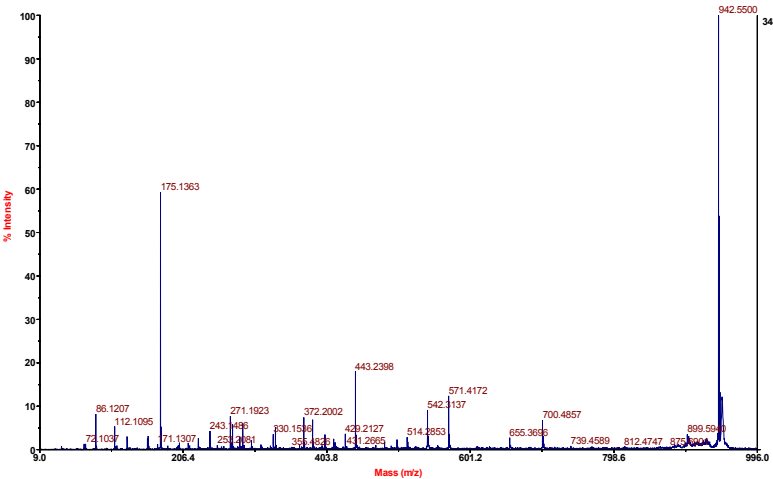

E:\...\C7\_MSMS\_942.5059\_10.t2d  
Acquired:

4700 MS/MS Precursor 899.431 Spec #1 MC[BP = 899.4, 7578]

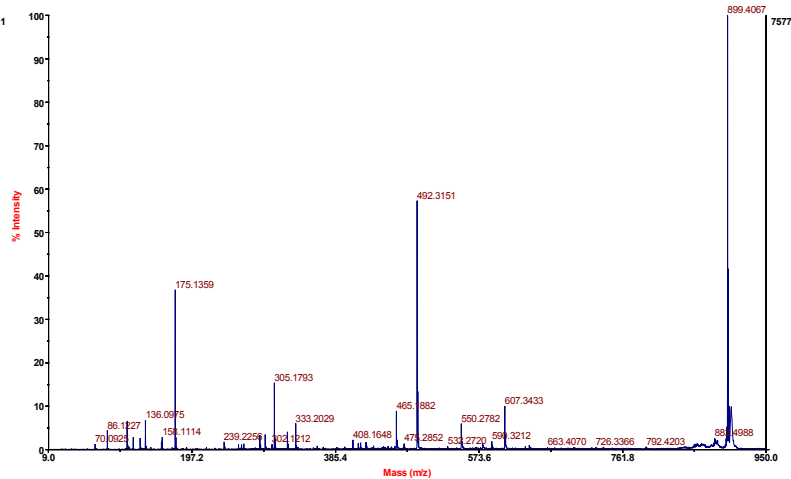

E:\...\C7\_MSMS\_899.4311\_4.t2d  
Acquired:
