# Supplementary material for: Physiological, Ultrastructural and Proteomic Responses in the Leaf of Maize Seedlings to Polyethylene Glycol-Stimulated Severe Water Deficiency
Source: MDPI journal article supplement (doi:10.3390/ijms160921606), 2015-09-08
Supplement: s1 [file s1]

4700 MS/MS Precursor 1766.81 Spec #1 MC[BP = 542.2, 2825]

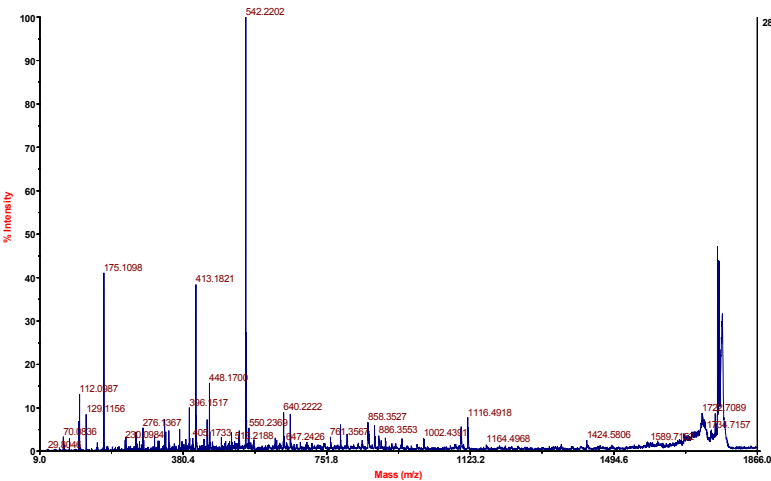

E:\...\C2\_MSMS\_1766.8110\_3.t2d  
Acquired:

4700 MS/MS Precursor 1656.74 Spec #1 MC[BP = 1656.7, 389]

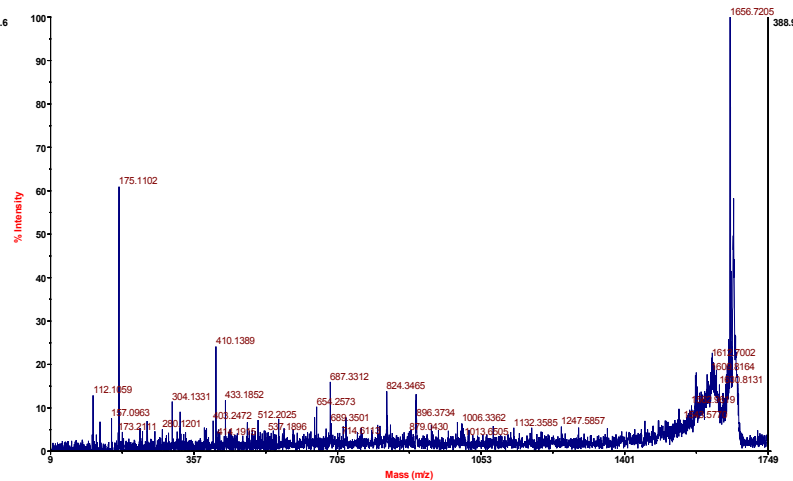

E:\...\C2\_MSMS\_1656.7396\_10.t2d  
Acquired:

4700 MS/MS Precursor 1453.74 Spec #1 MC[BP = 1453.7, 1629]

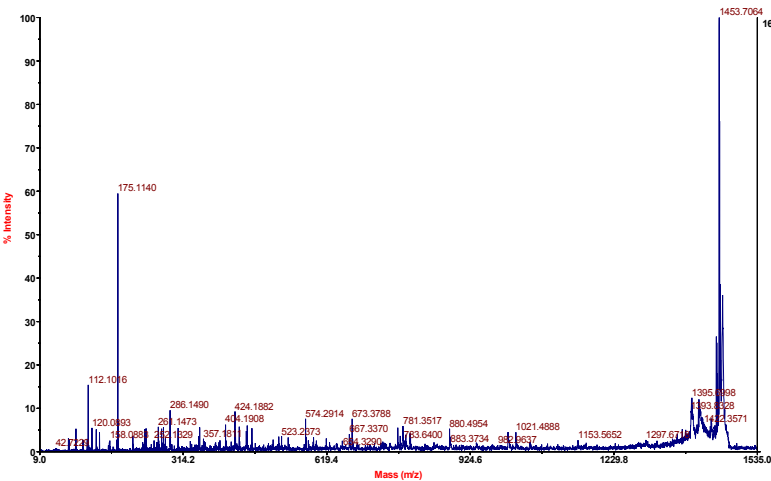

E:\...\C2\_MSMS\_1453.7362\_4.t2d  
Acquired:

4700 MS/MS Precursor 1410.68 Spec #1 MC[BP = 175.1, 787]

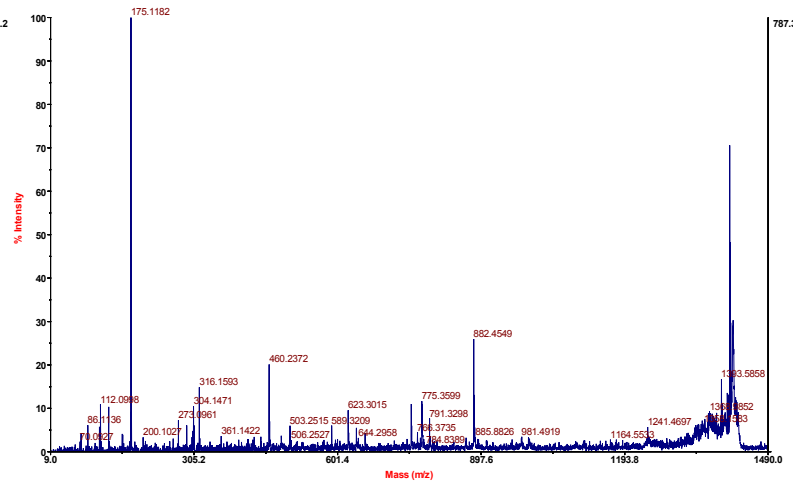

E:\...\C2\_MSMS\_1410.6760\_11.t2d  
Acquired:

4700 MS/MS Precursor 1393.62 Spec #1 MC[BP = 175.1, 7543]

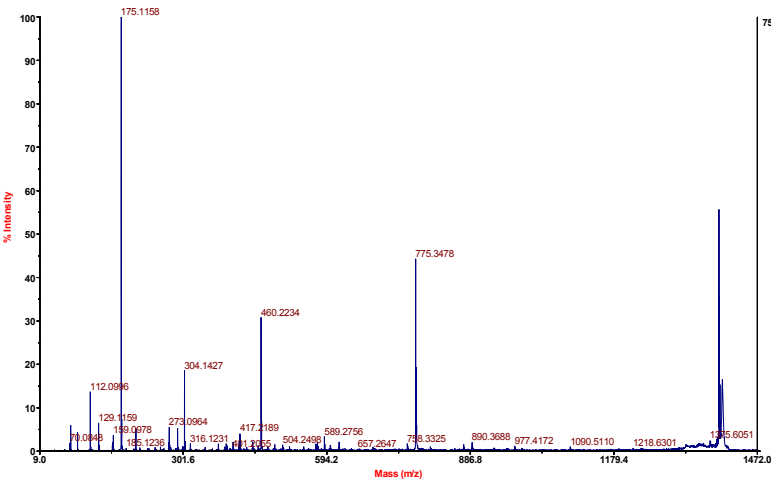

E:\...\C2\_MSMS\_1393.6205\_2.t2d  
Acquired:

4700 MS/MS Precursor 1058.55 Spec #1 MC[BP = 1058.6, 1766]

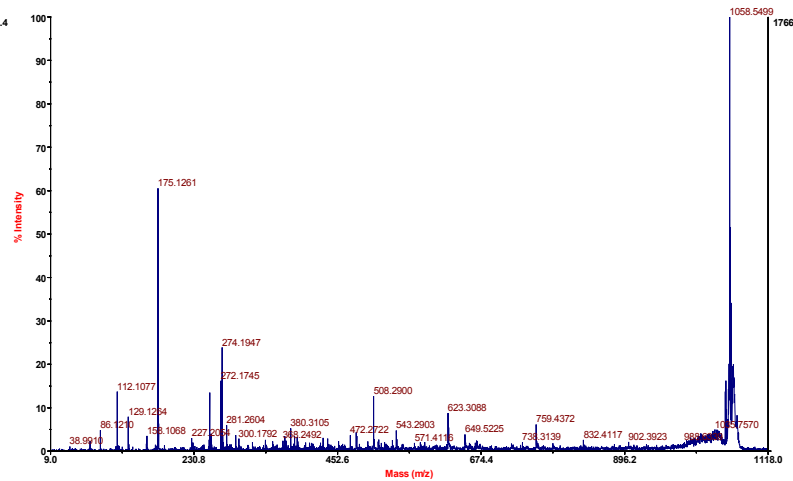

E:\...\C2\_MSMS\_1058.5481\_7.t2d  
Acquired:

4700 MS/MS Precursor 1051.64 Spec #1 MC[BP = 1051.6, 1218]

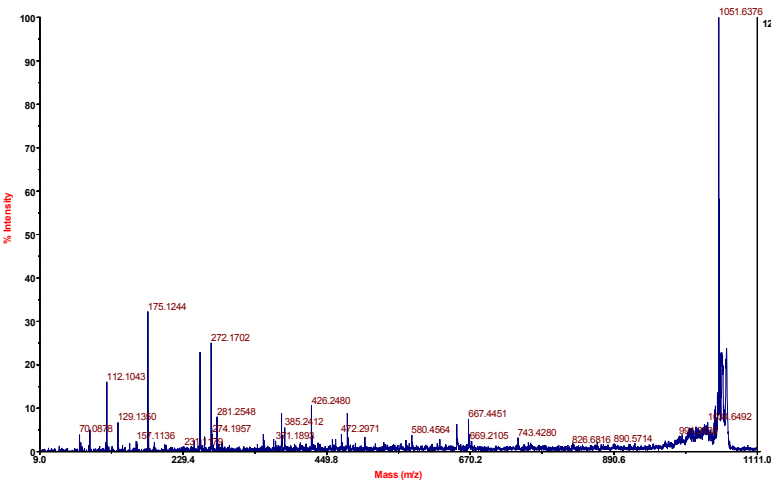

E:\...\C2\_MSMS\_1051.6426\_9.t2d  
Acquired:

4700 MS/MS Precursor 851.398 Spec #1 MC[BP = 851.4, 1753]

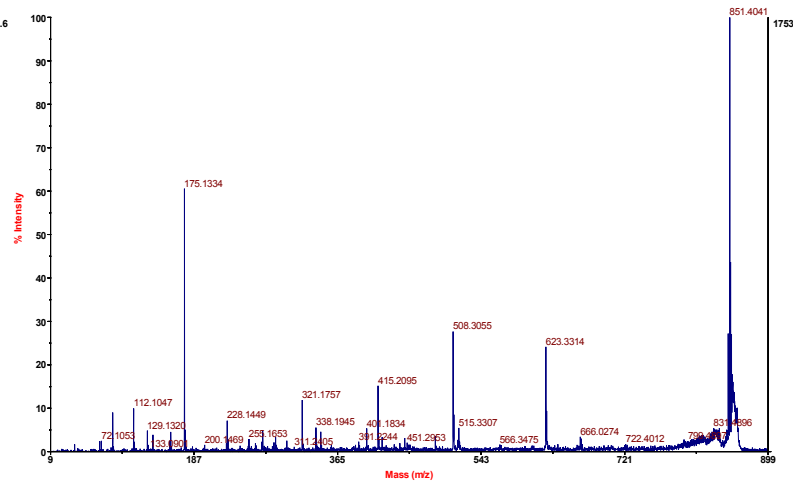

E:\...\C2\_MSMS\_851.3978\_5.t2d  
Acquired:
