# Supplementary figures and images for: Physiological, Ultrastructural and Proteomic Responses in the Leaf of Maize Seedlings to Polyethylene Glycol-Stimulated Severe Water Deficiency
Source: MDPI journal article supplement (doi:10.3390/ijms160921606), 2015-09-08

4700 Reflector Spec #1 MC[BP = 1051.7, 62855]

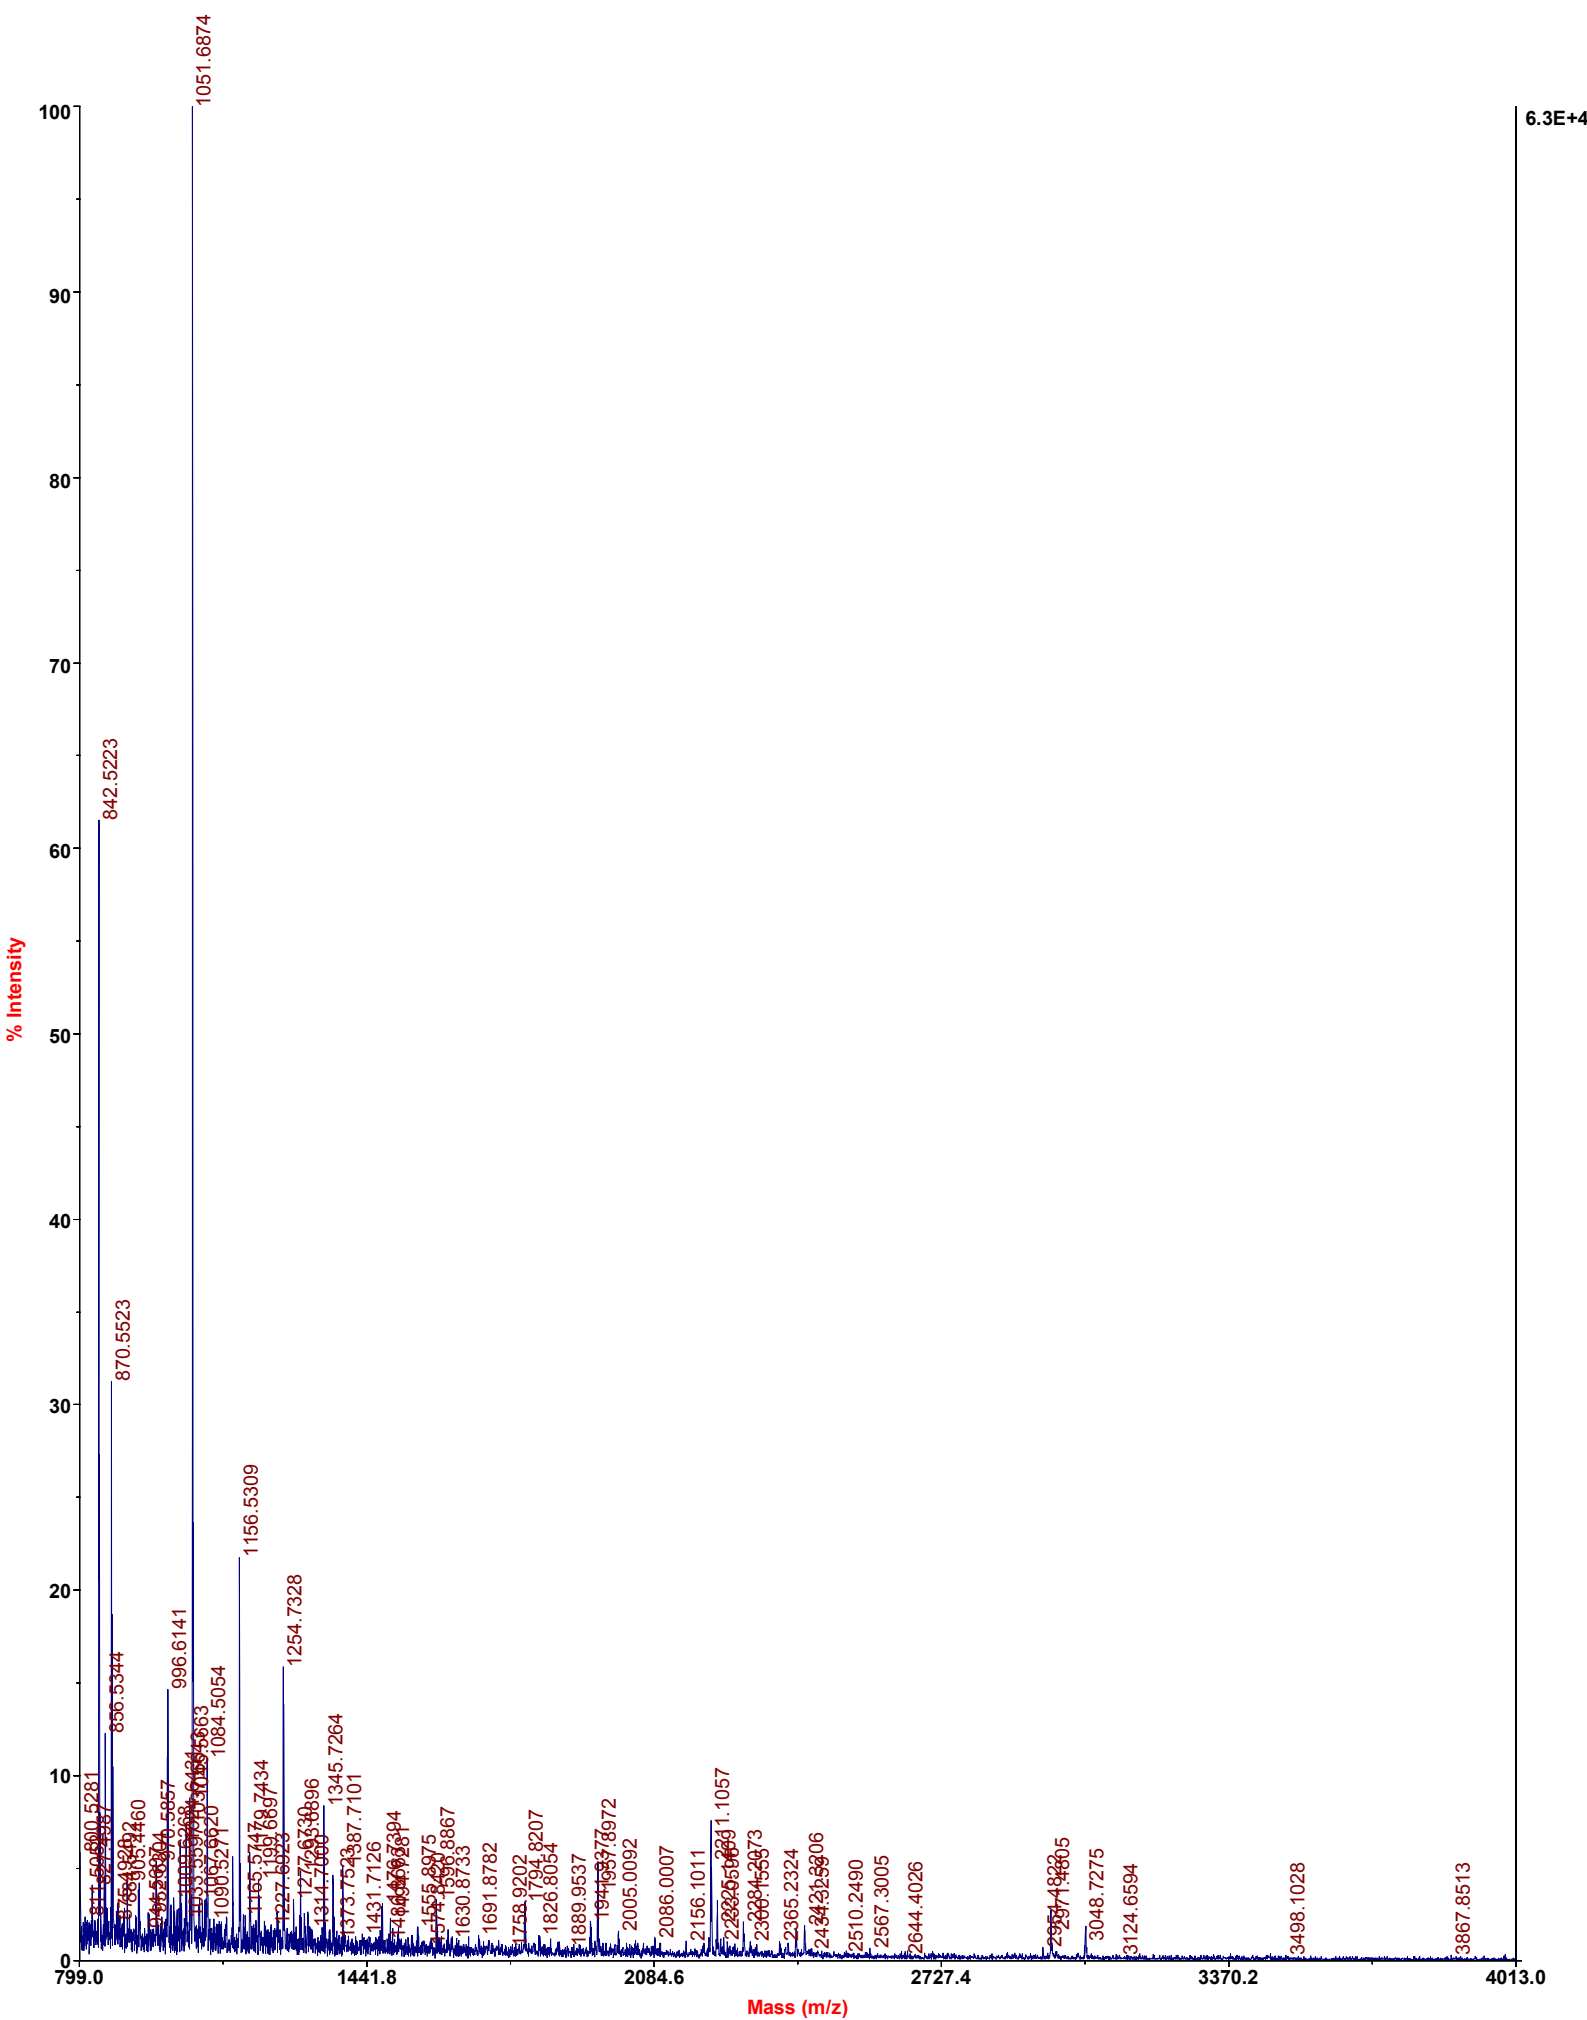

Supplement: s1 [file s1]

# Applied Biosystems 4700 Proteomics Analyzer 7044

4700 Reflector Spec #1 MC[BP = 2318.0, 15529]

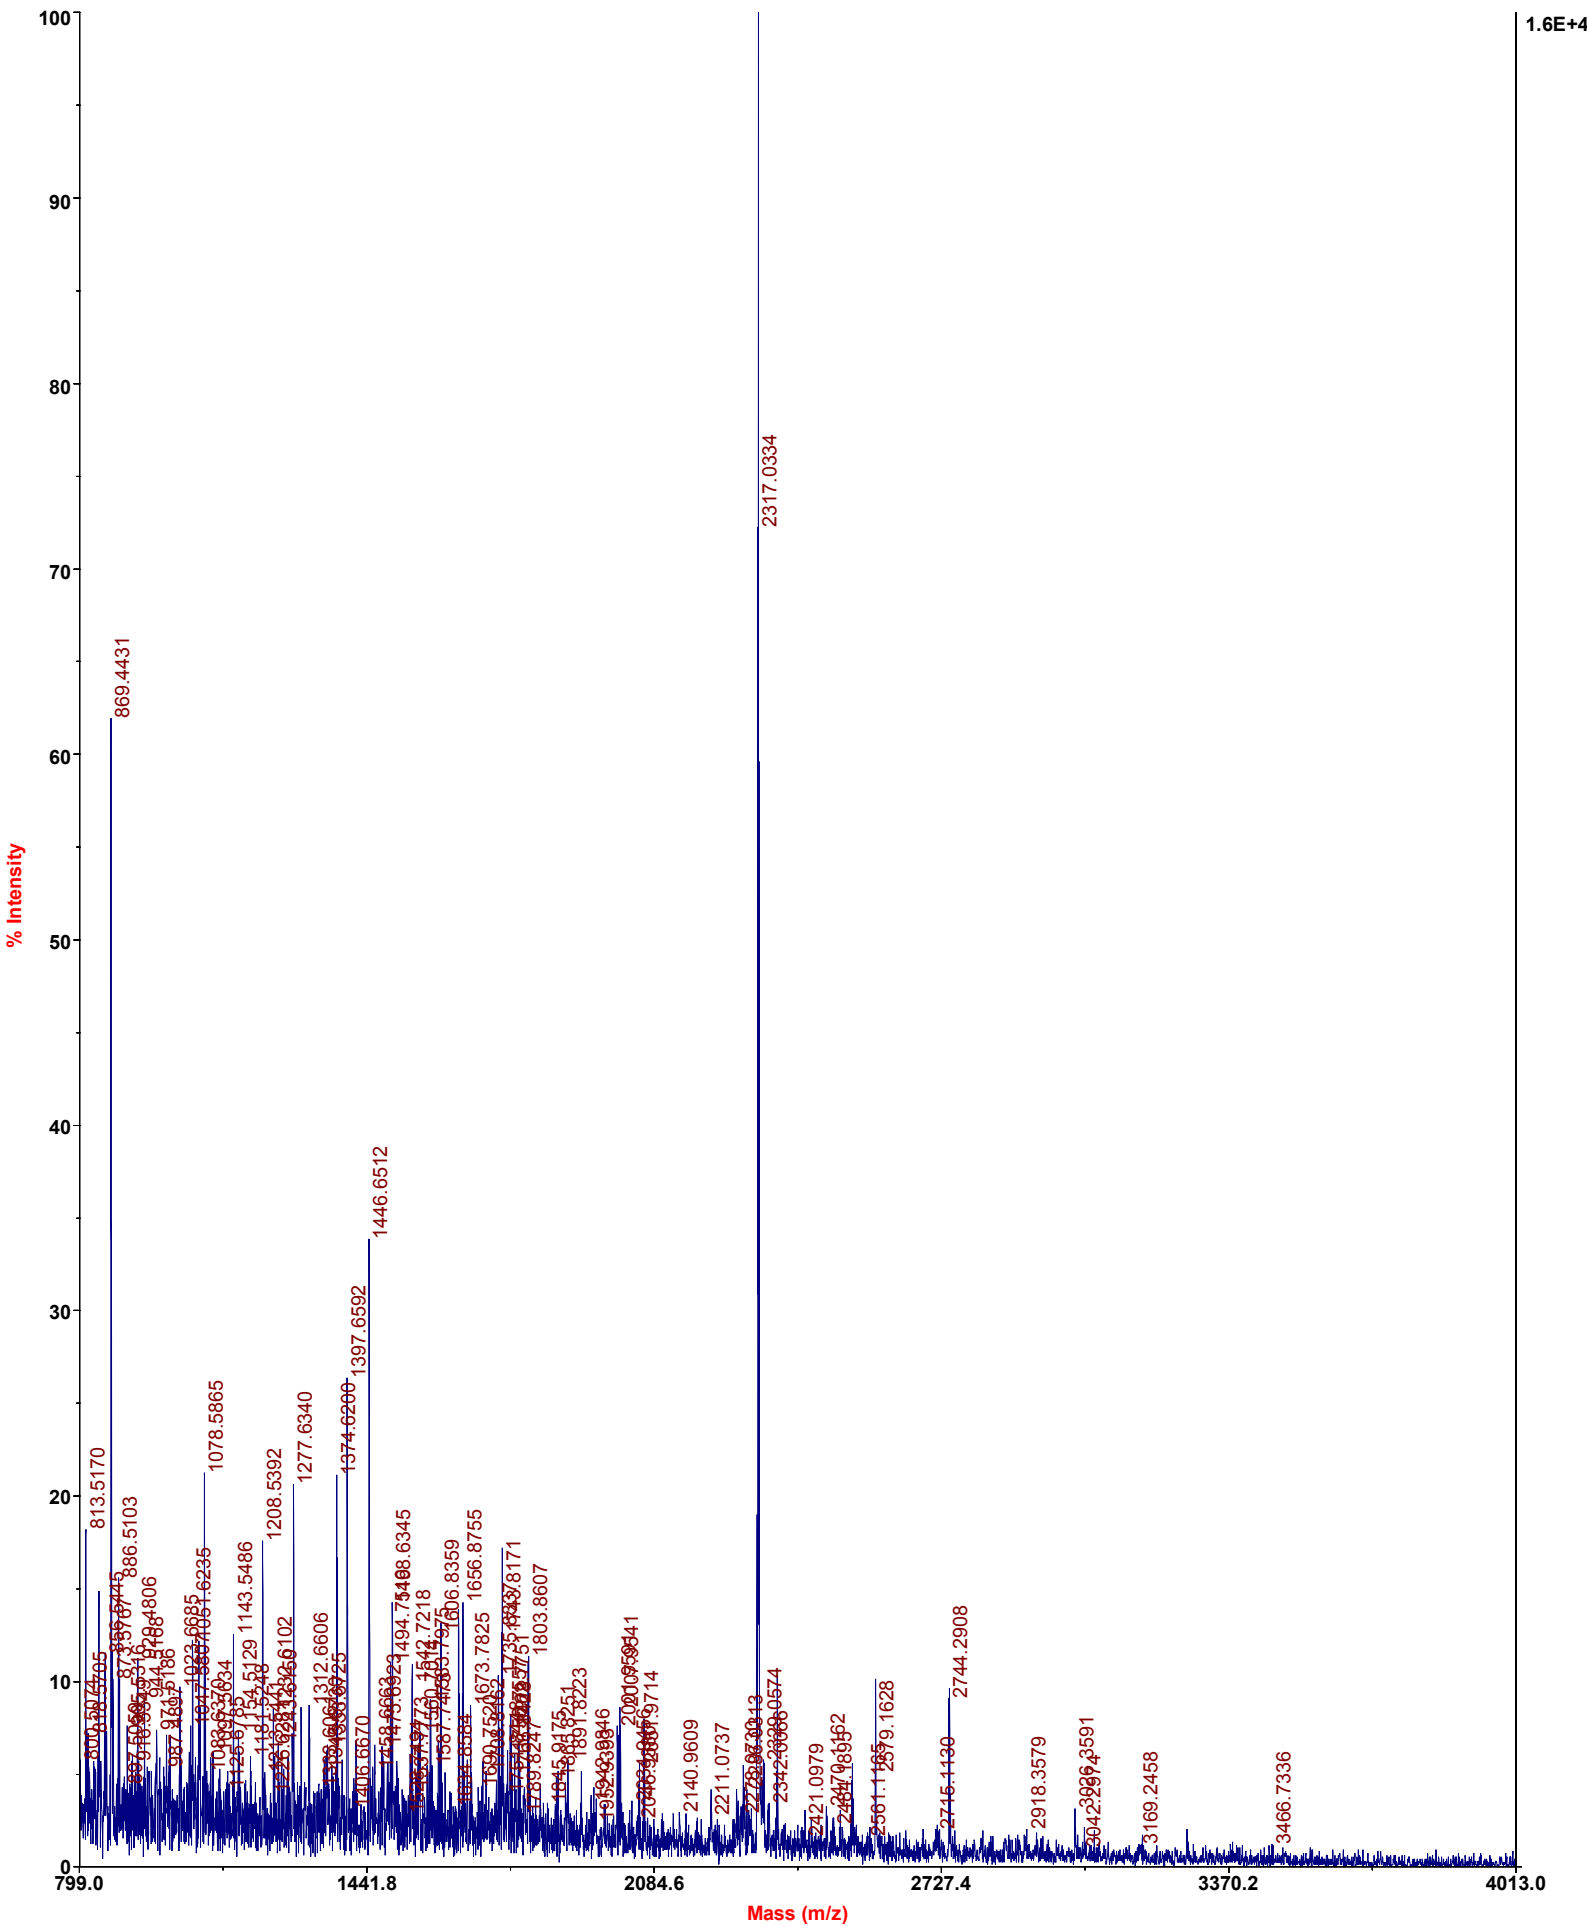

Printed: 12:59, March 31, 2014

Supplement: s1 [file s1]

4700 Reflector Spec #1 MC[BP = 1021.5, 66447]

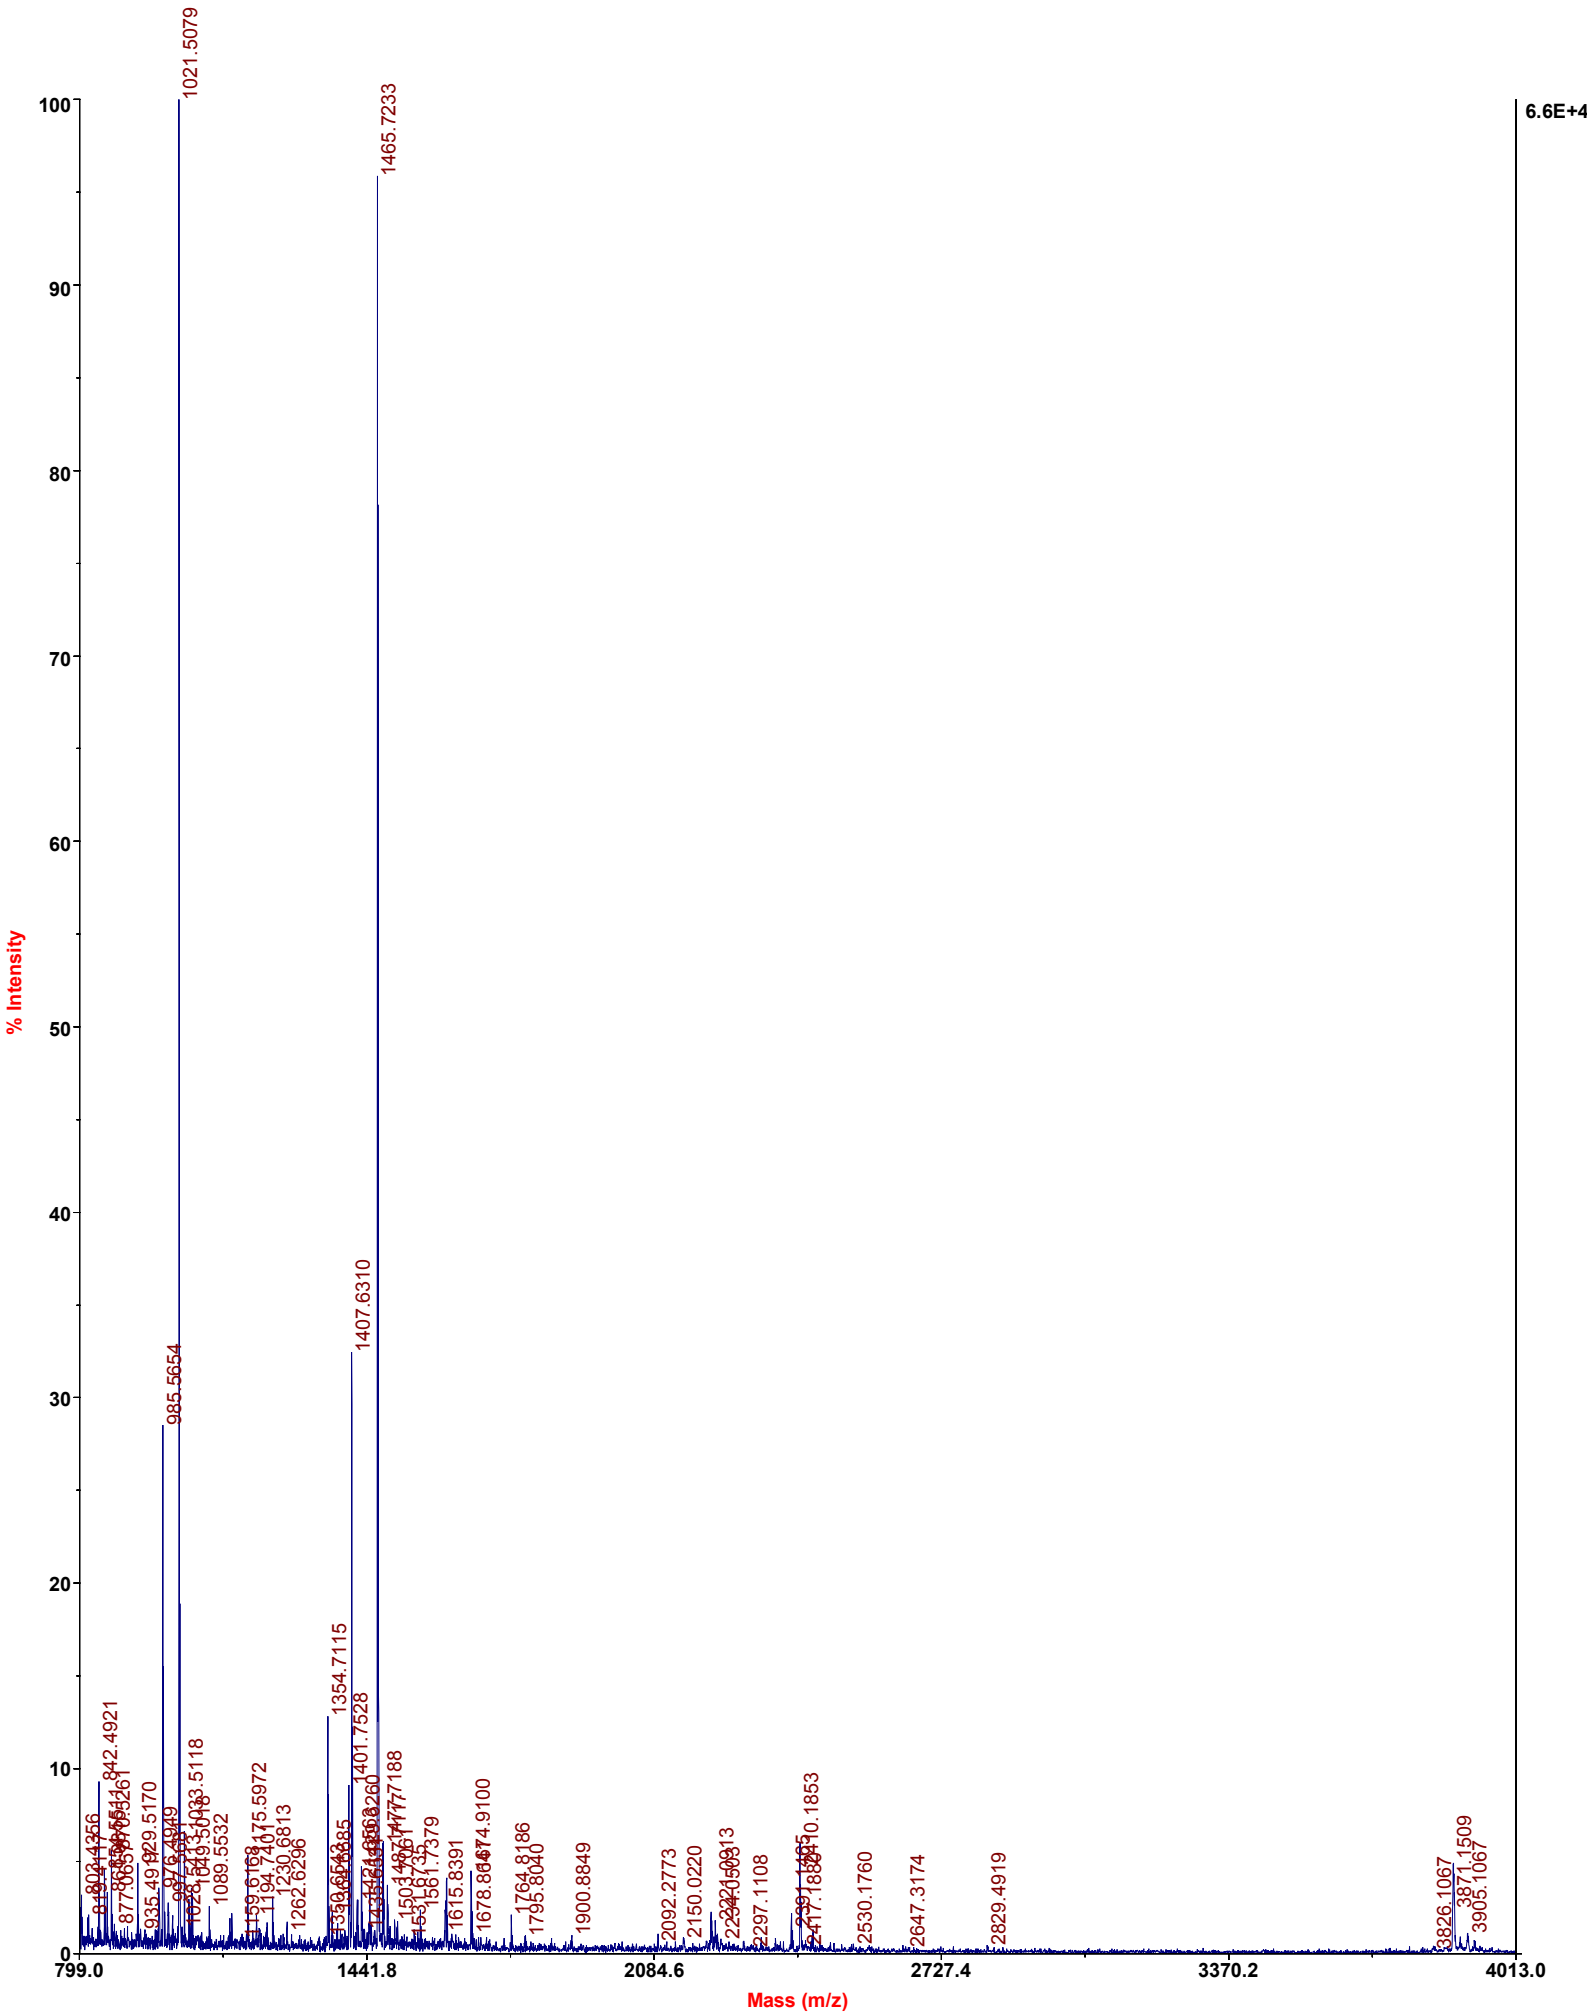

Supplement: s1 [file s1]

4700 Reflector Spec #1 MC[BP = 1393.6, 29145]

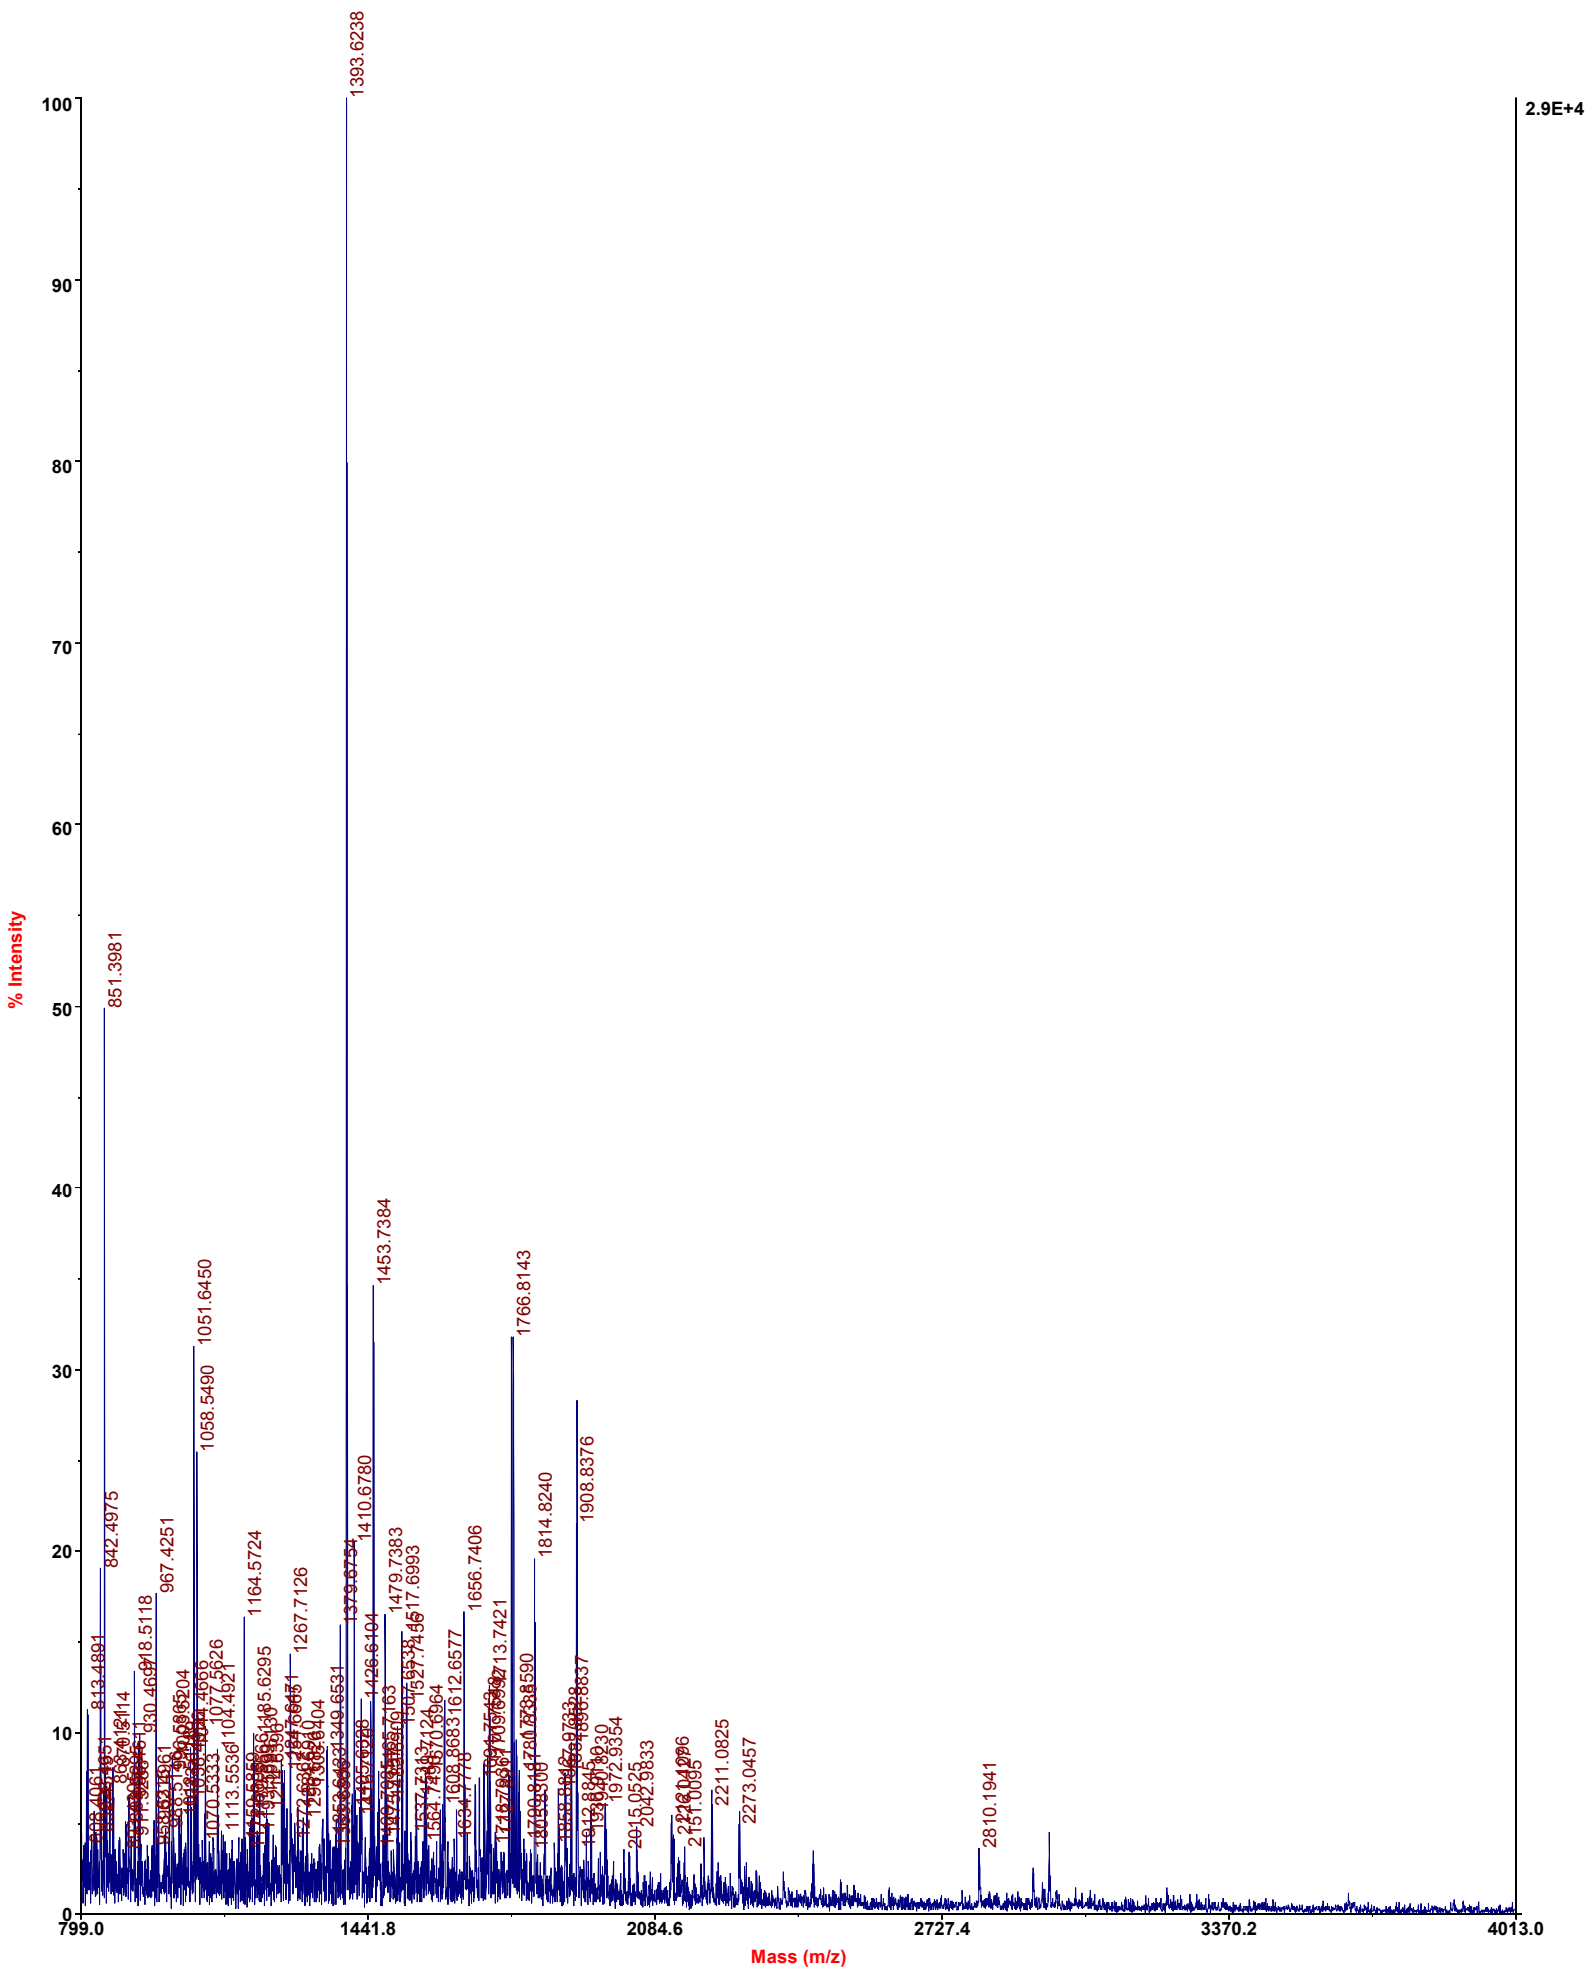

Supplement: s1 [file s1]

4700 Reflector Spec #1 MC[BP = 1884.8, 40596]

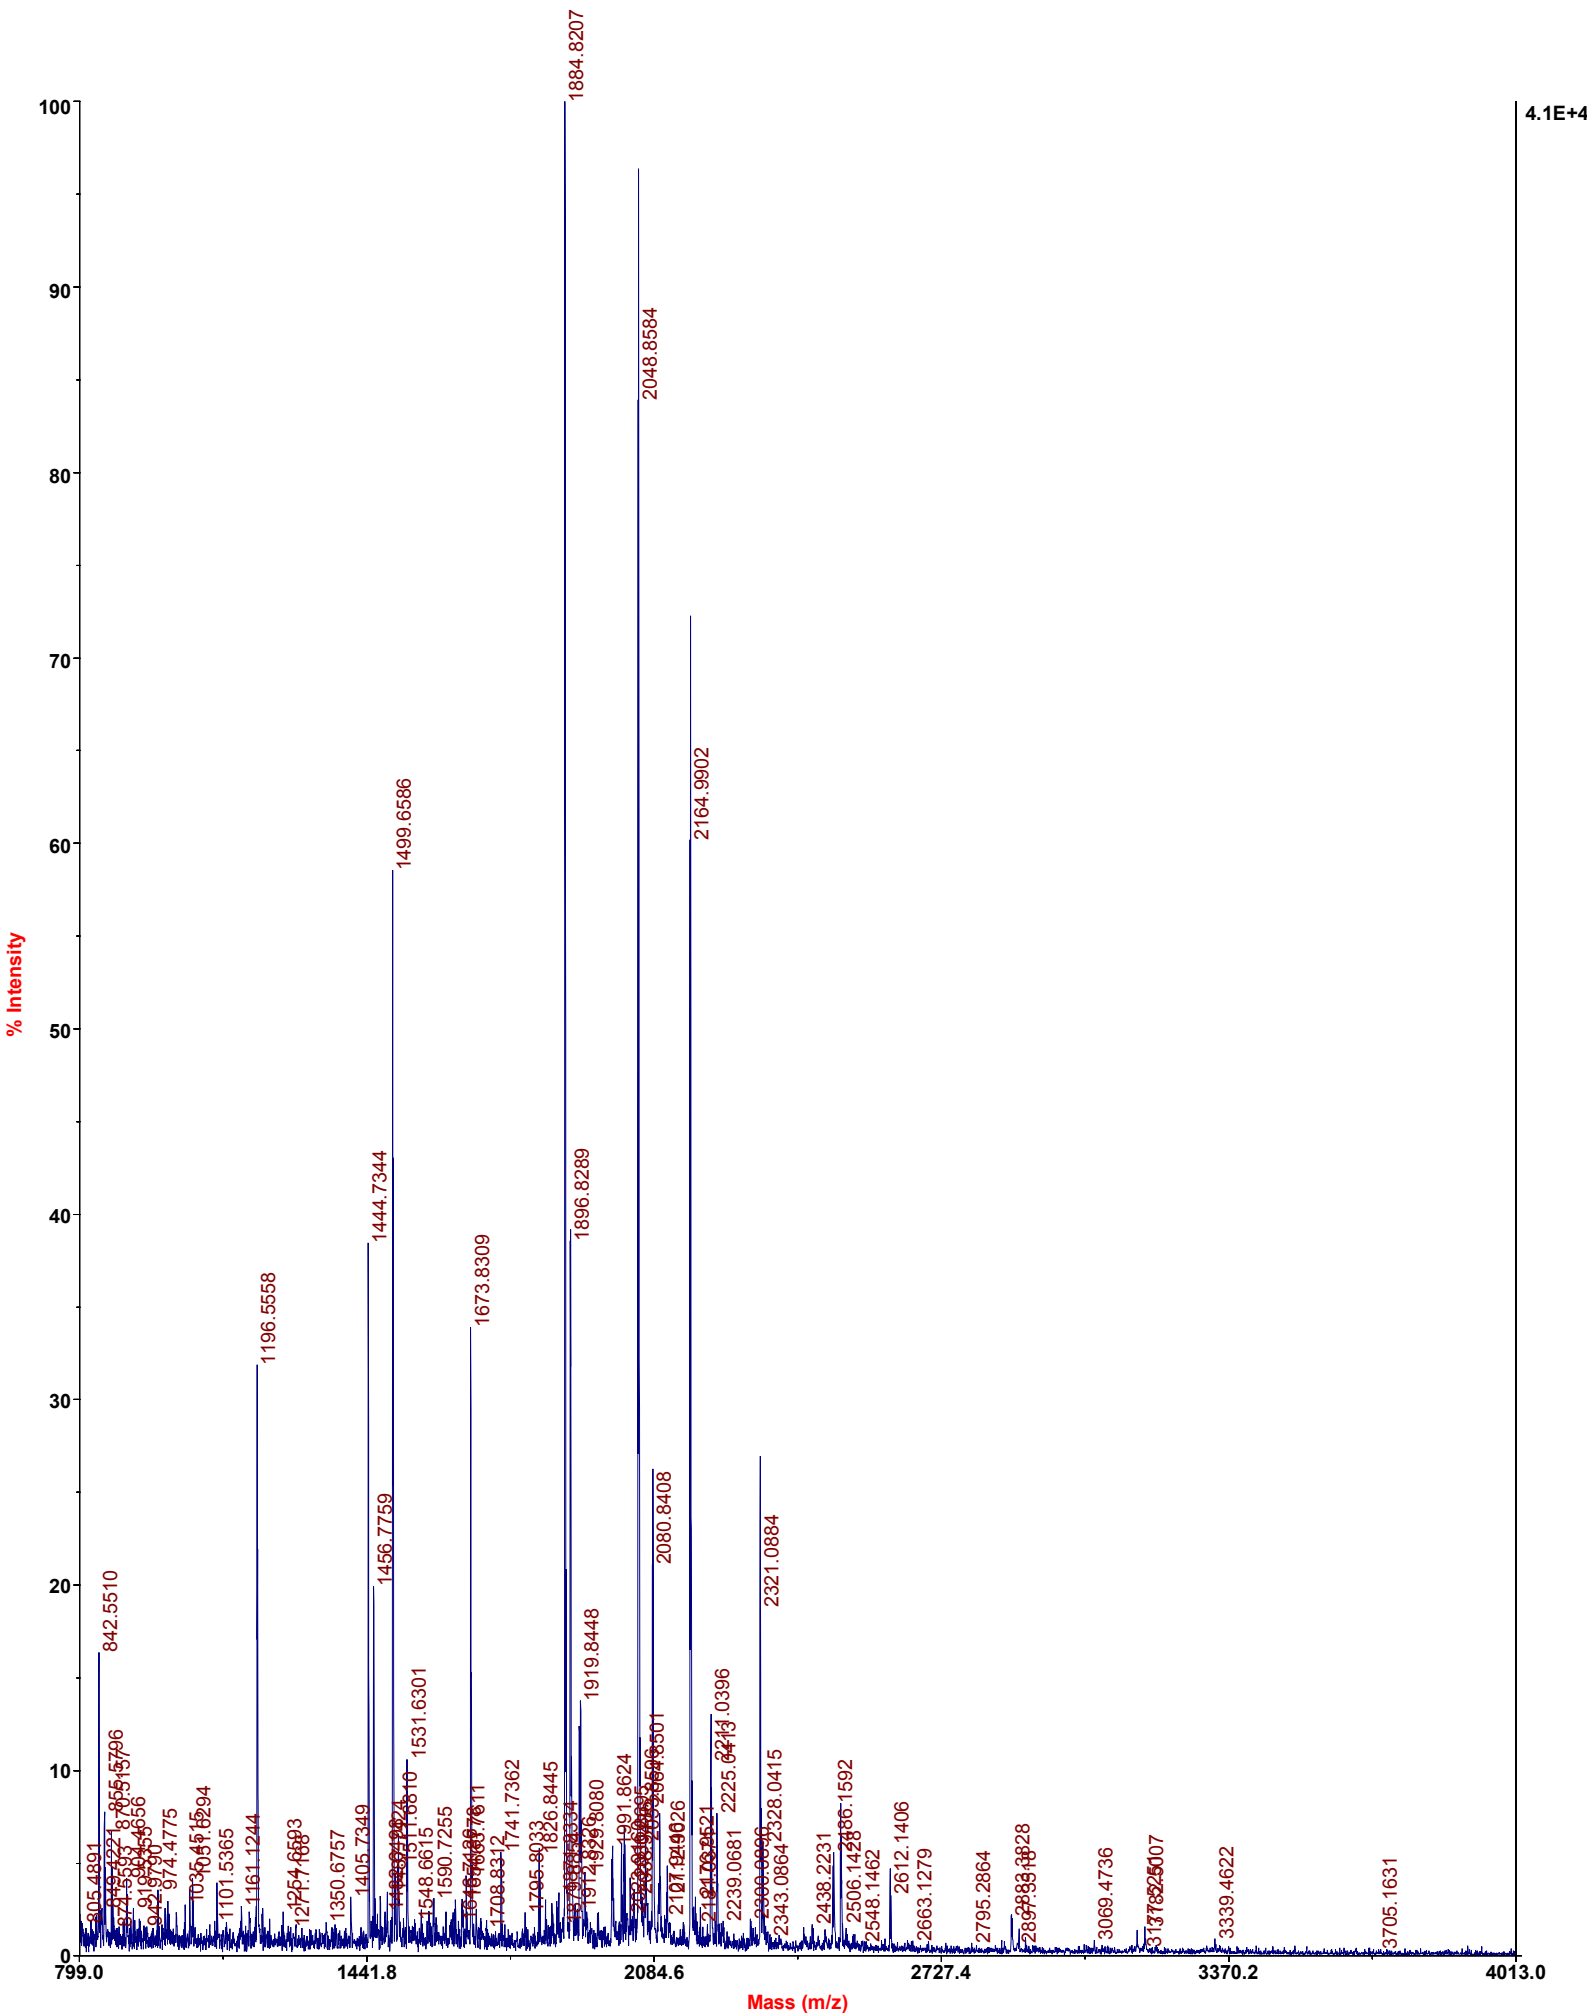

Supplement: s1 [file s1]

4700 Reflector Spec #1 MC[BP = 1250.5, 49914]

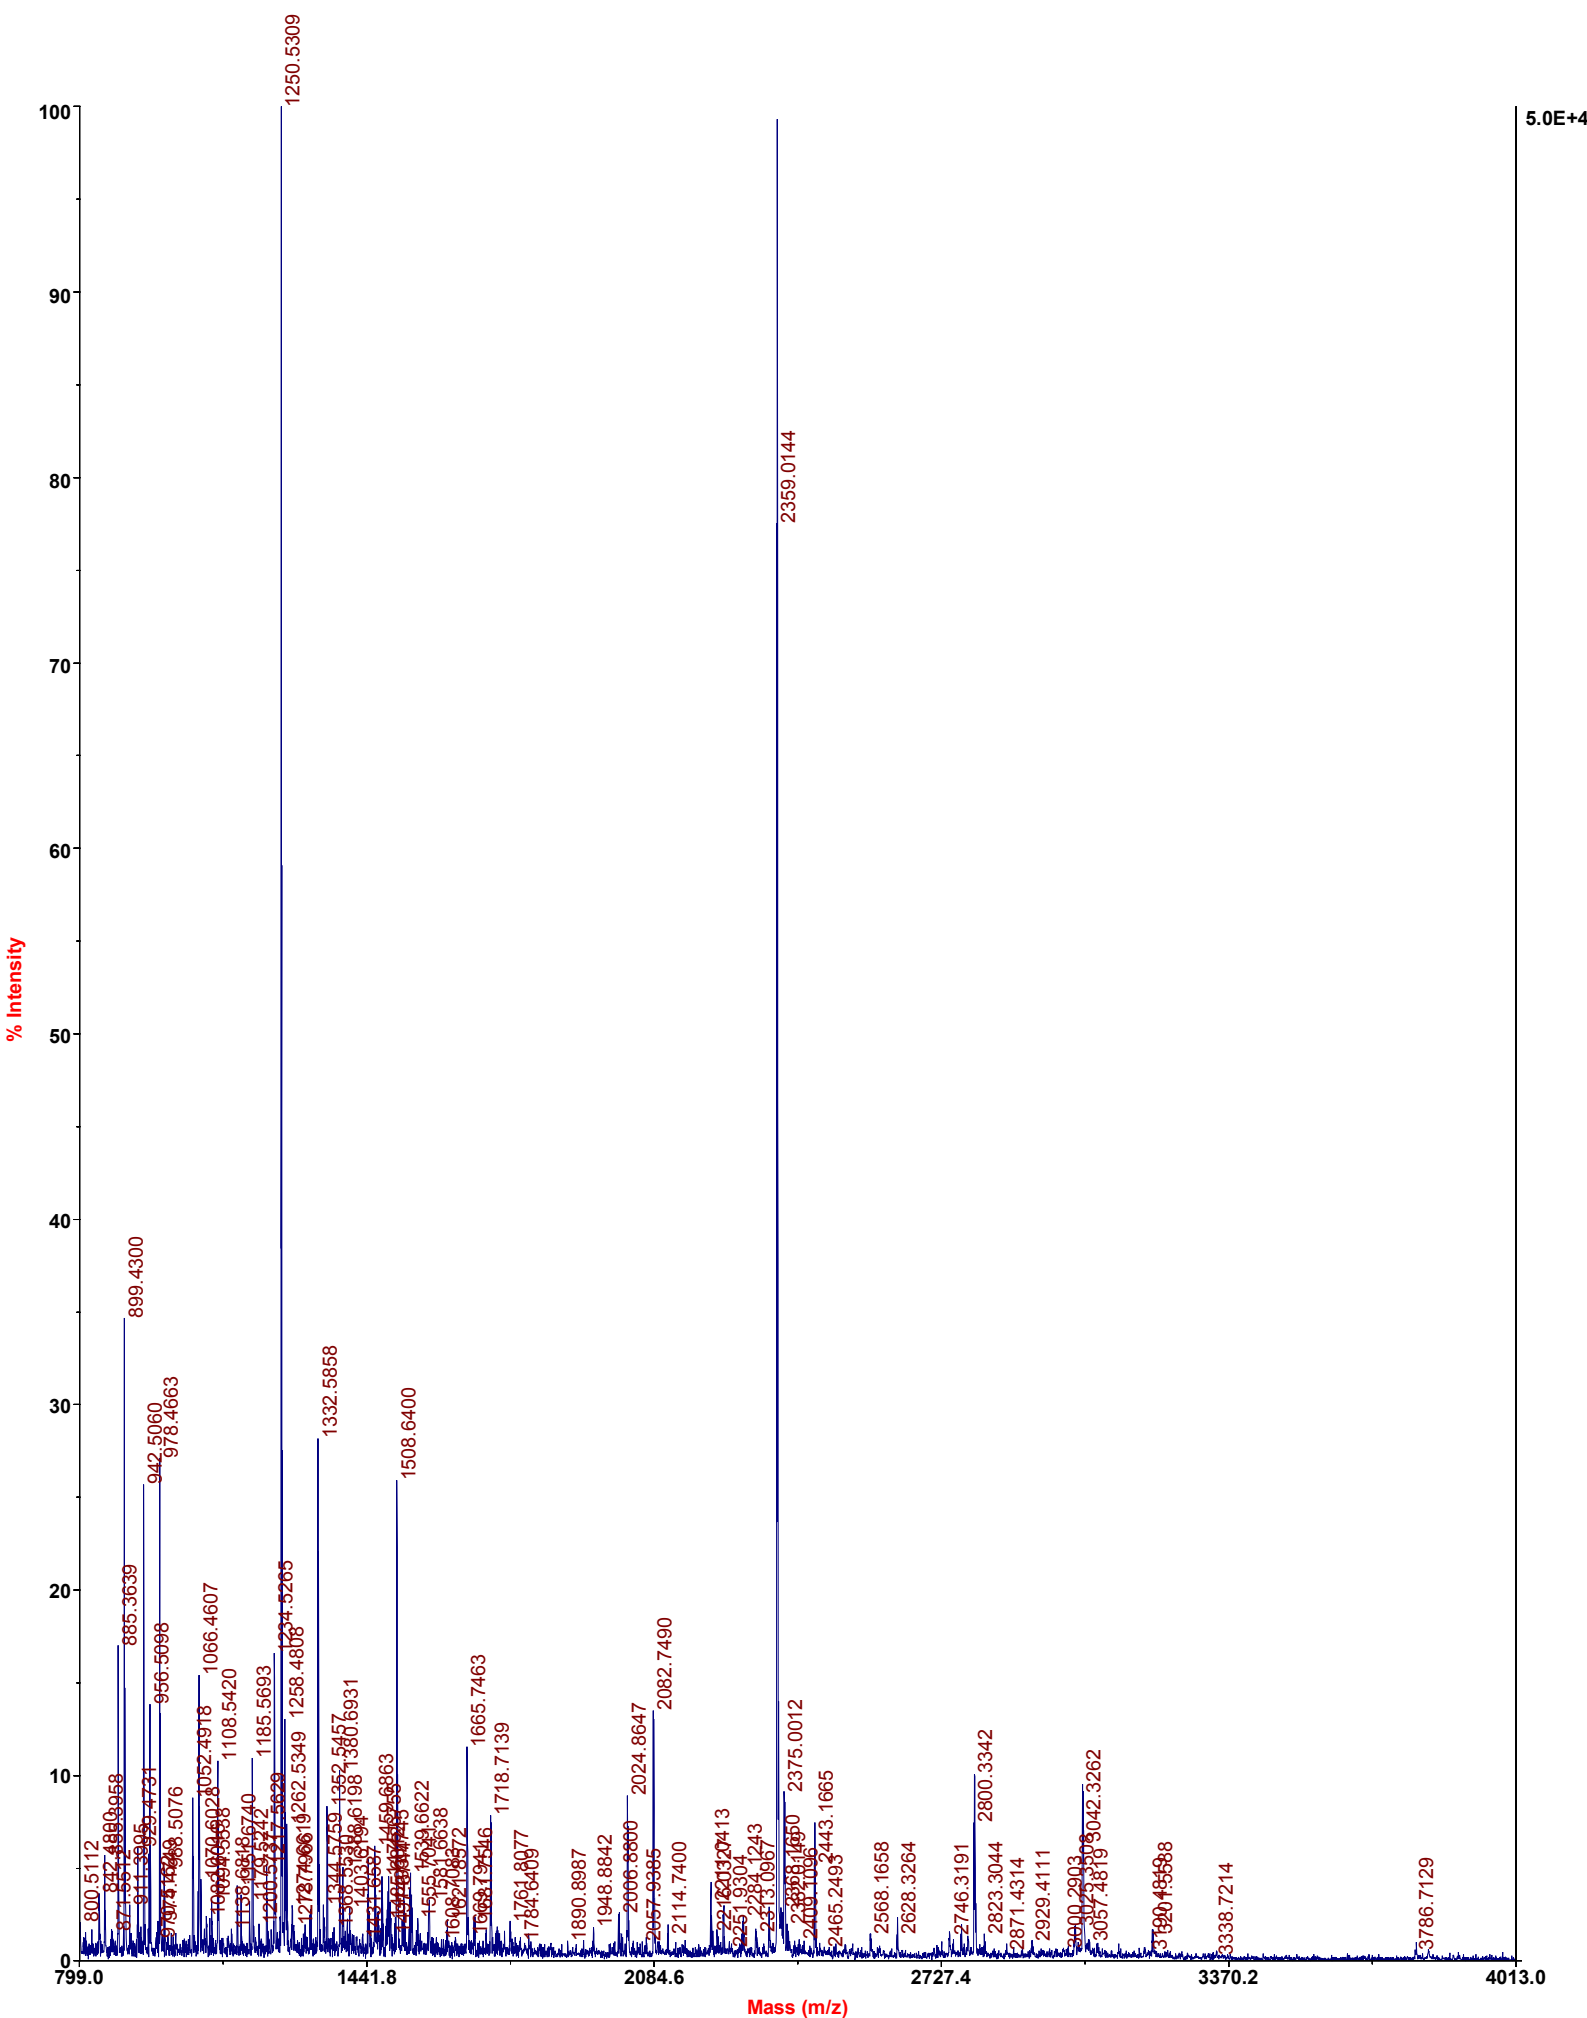

Supplement: s1 [file s1]

4700 Reflector Spec #1 MC[BP = 1120.5, 4769]

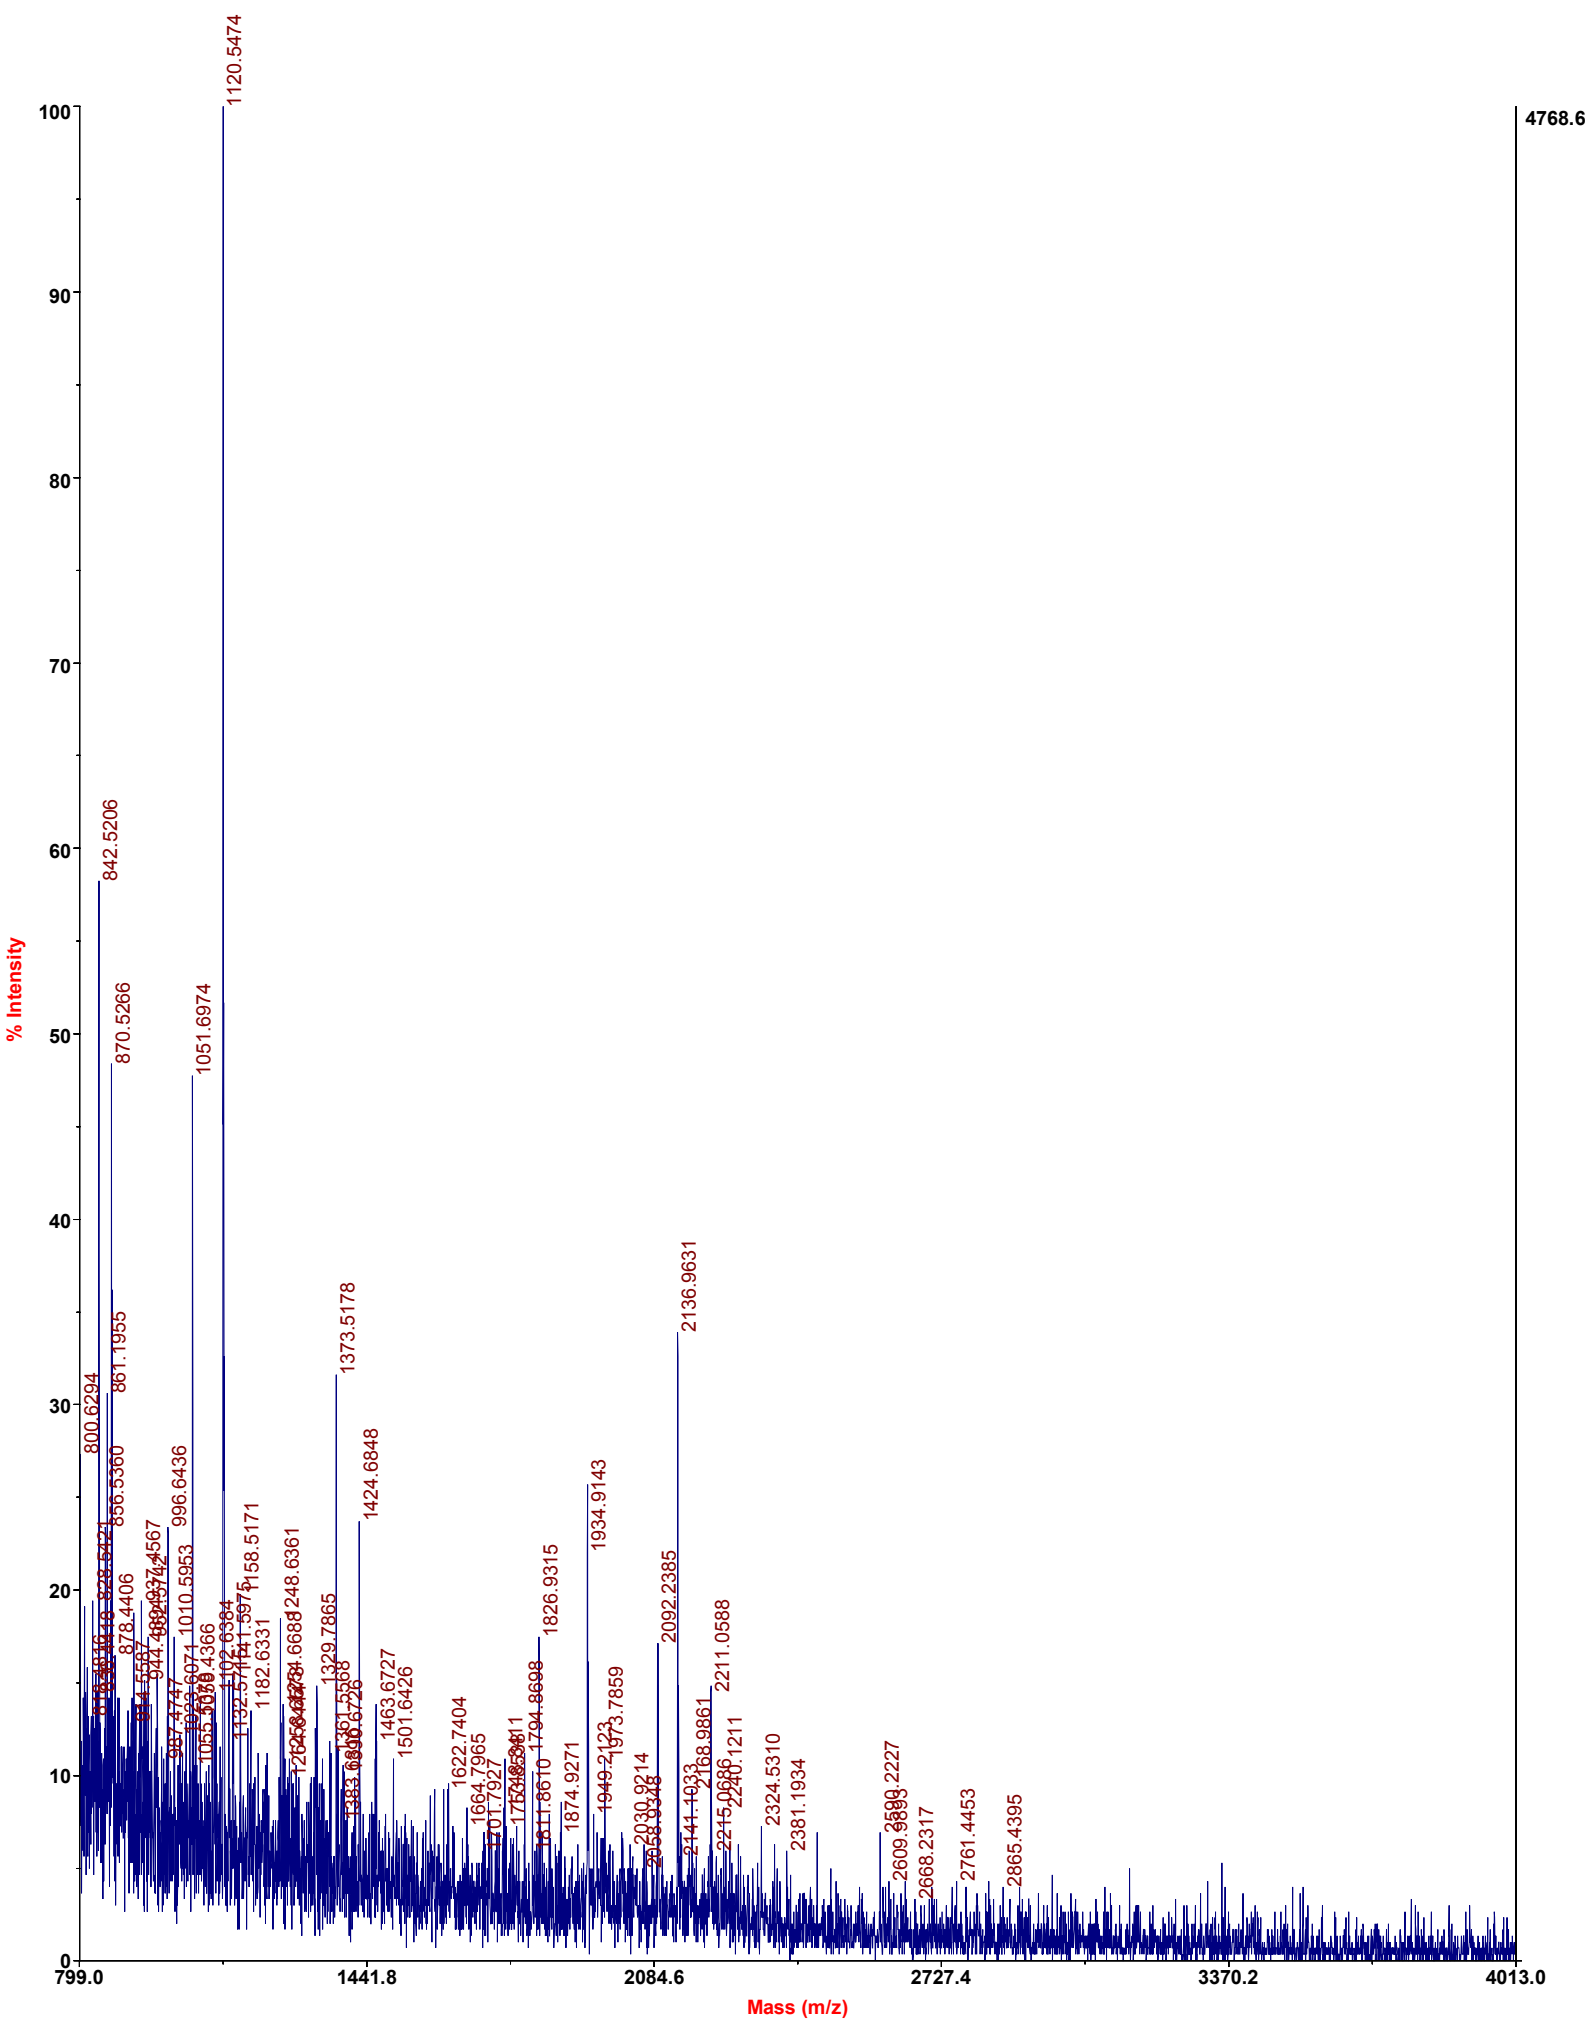

Supplement: s1 [file s1]

# Applied Biosystems 4700 Proteomics Analyzer 7044

4700 Reflector Spec #1 MC[BP = 1156.6, 15325]

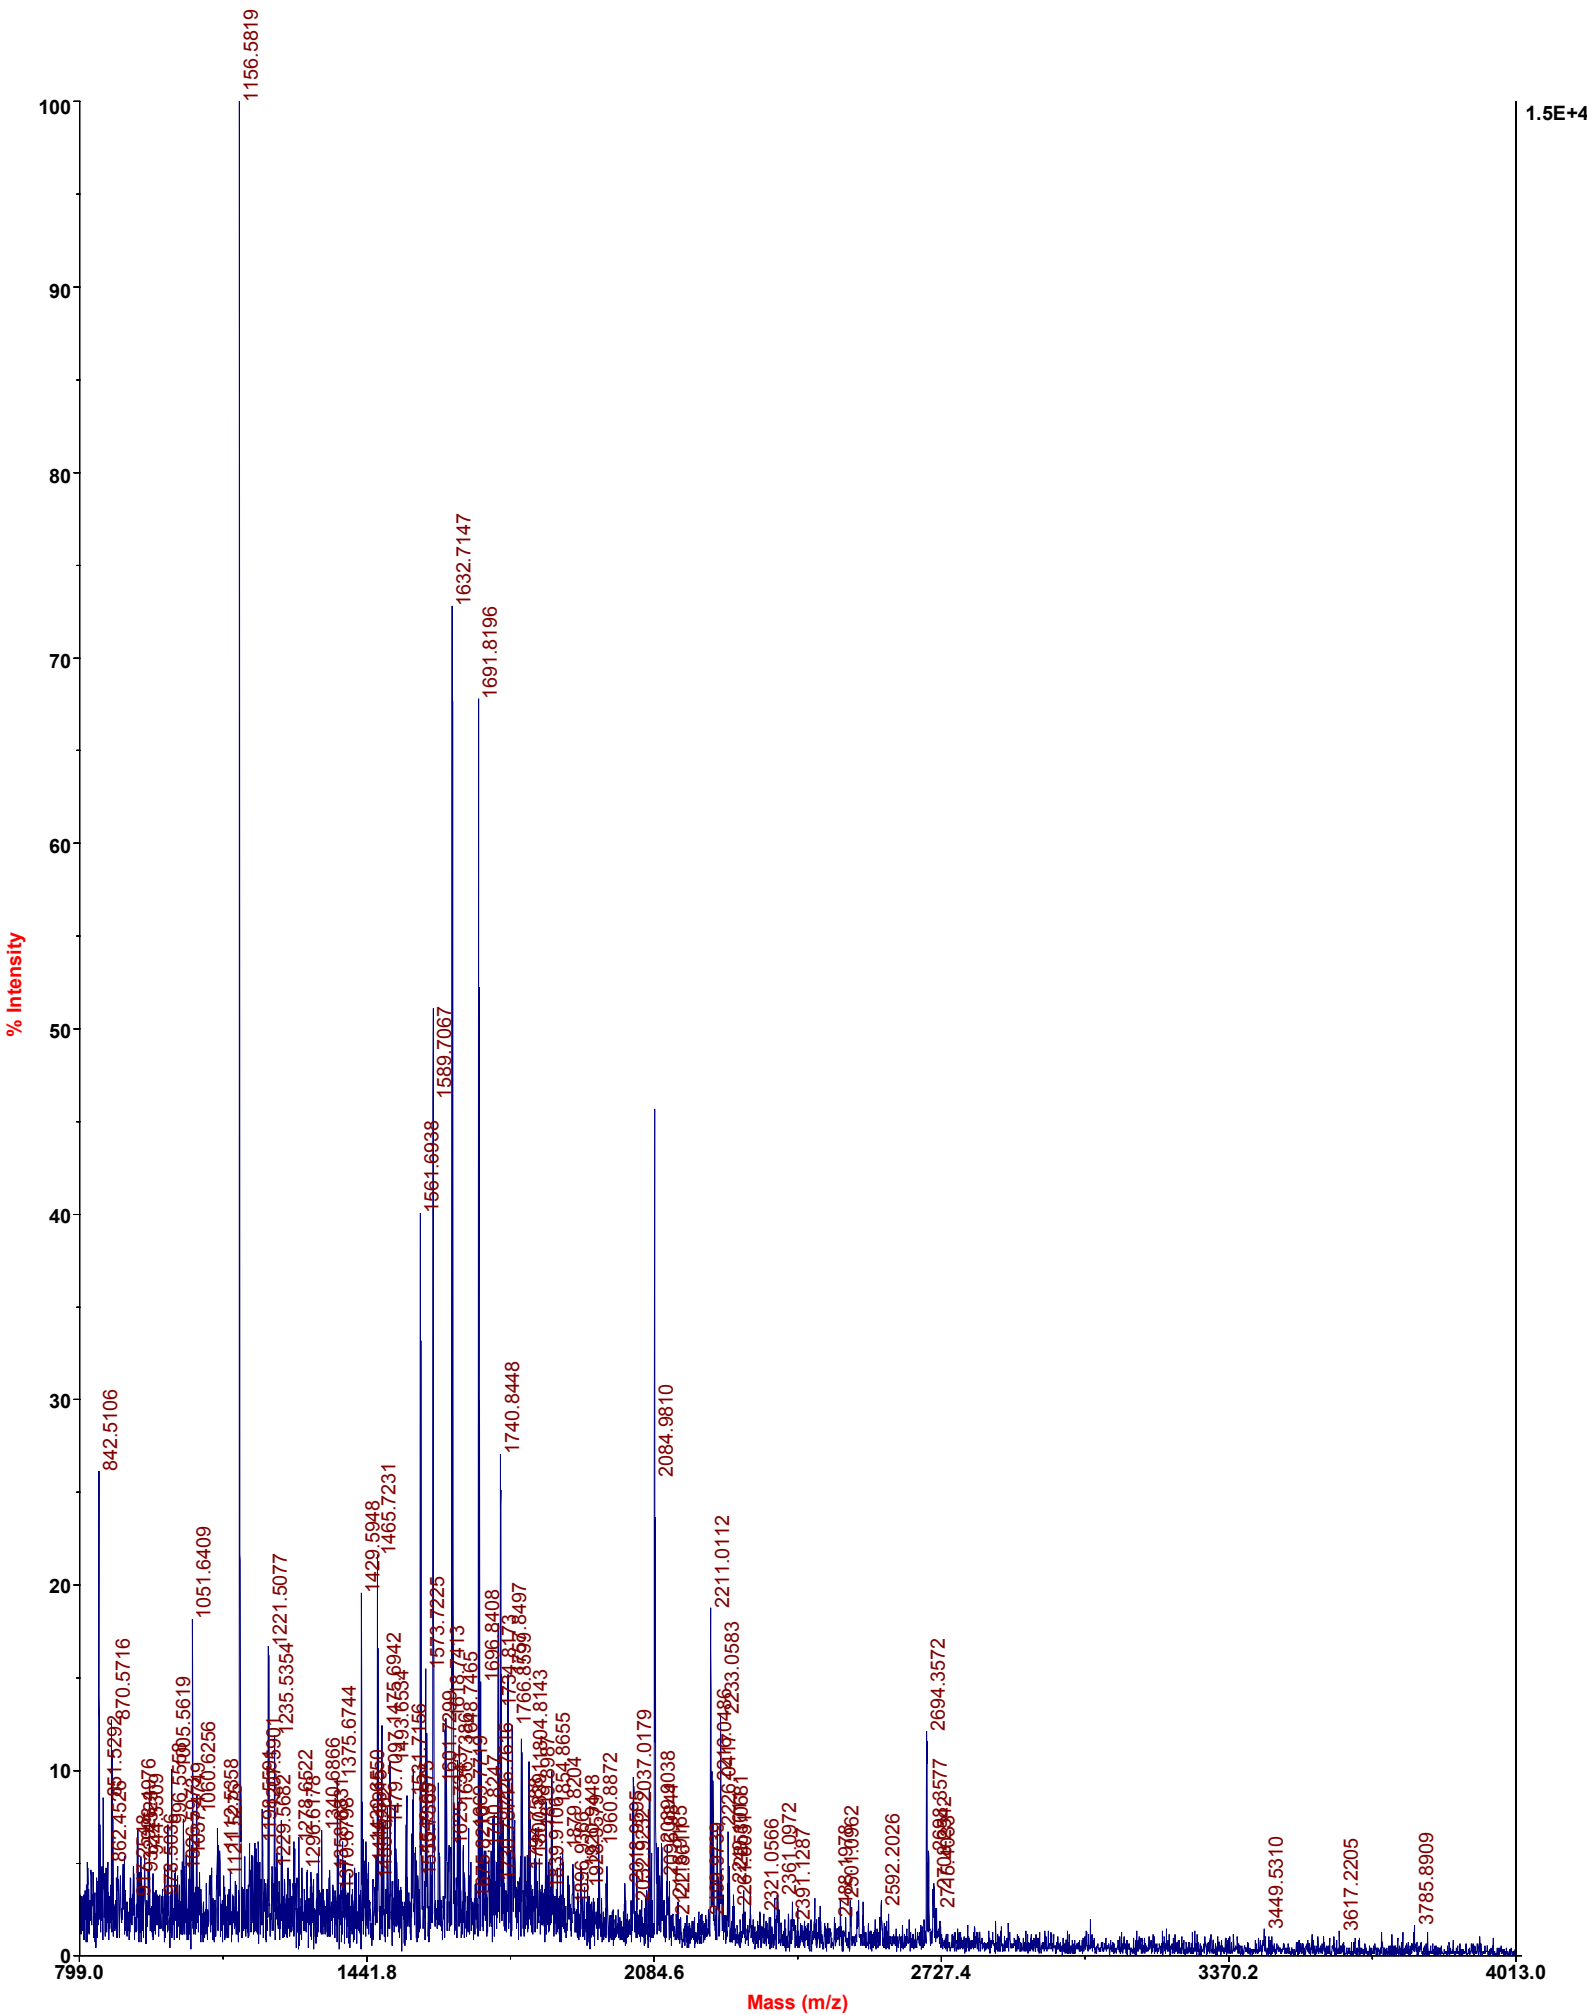

Printed: 13:02, March 31, 2014

Supplement: s1 [file s1]

4700 Reflector Spec #1 MC[BP = 2228.2, 89020]

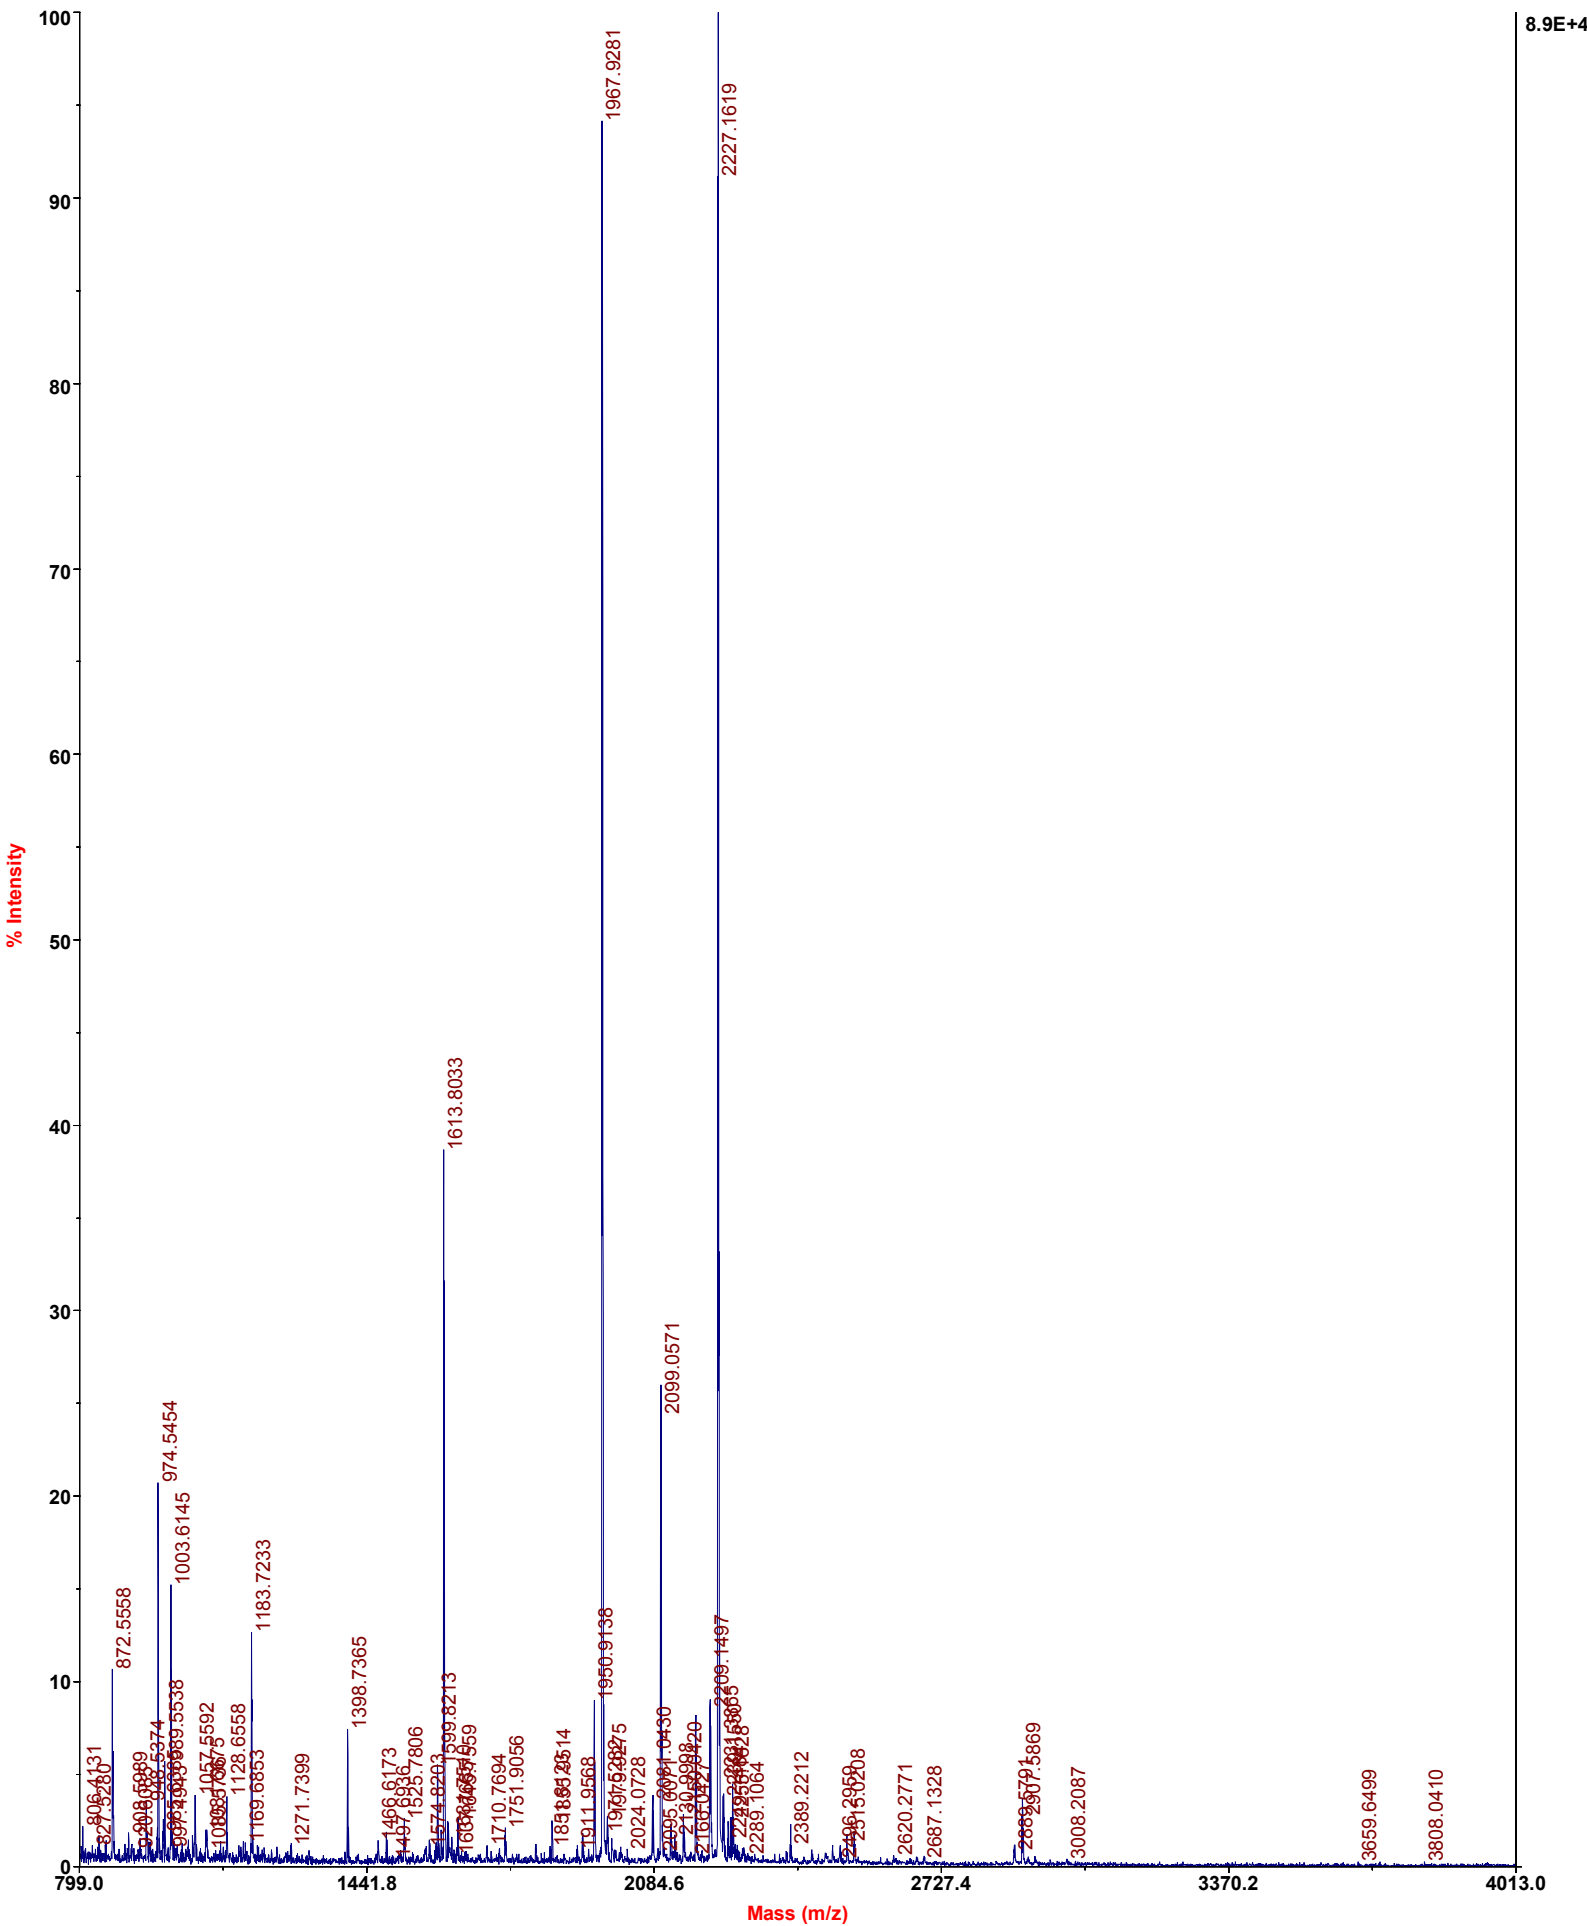

Supplement: s1 [file s1]

# Applied Biosystems 4700 Proteomics Analyzer 7044

4700 Reflector Spec #1 MC[BP = 1287.7, 23059]

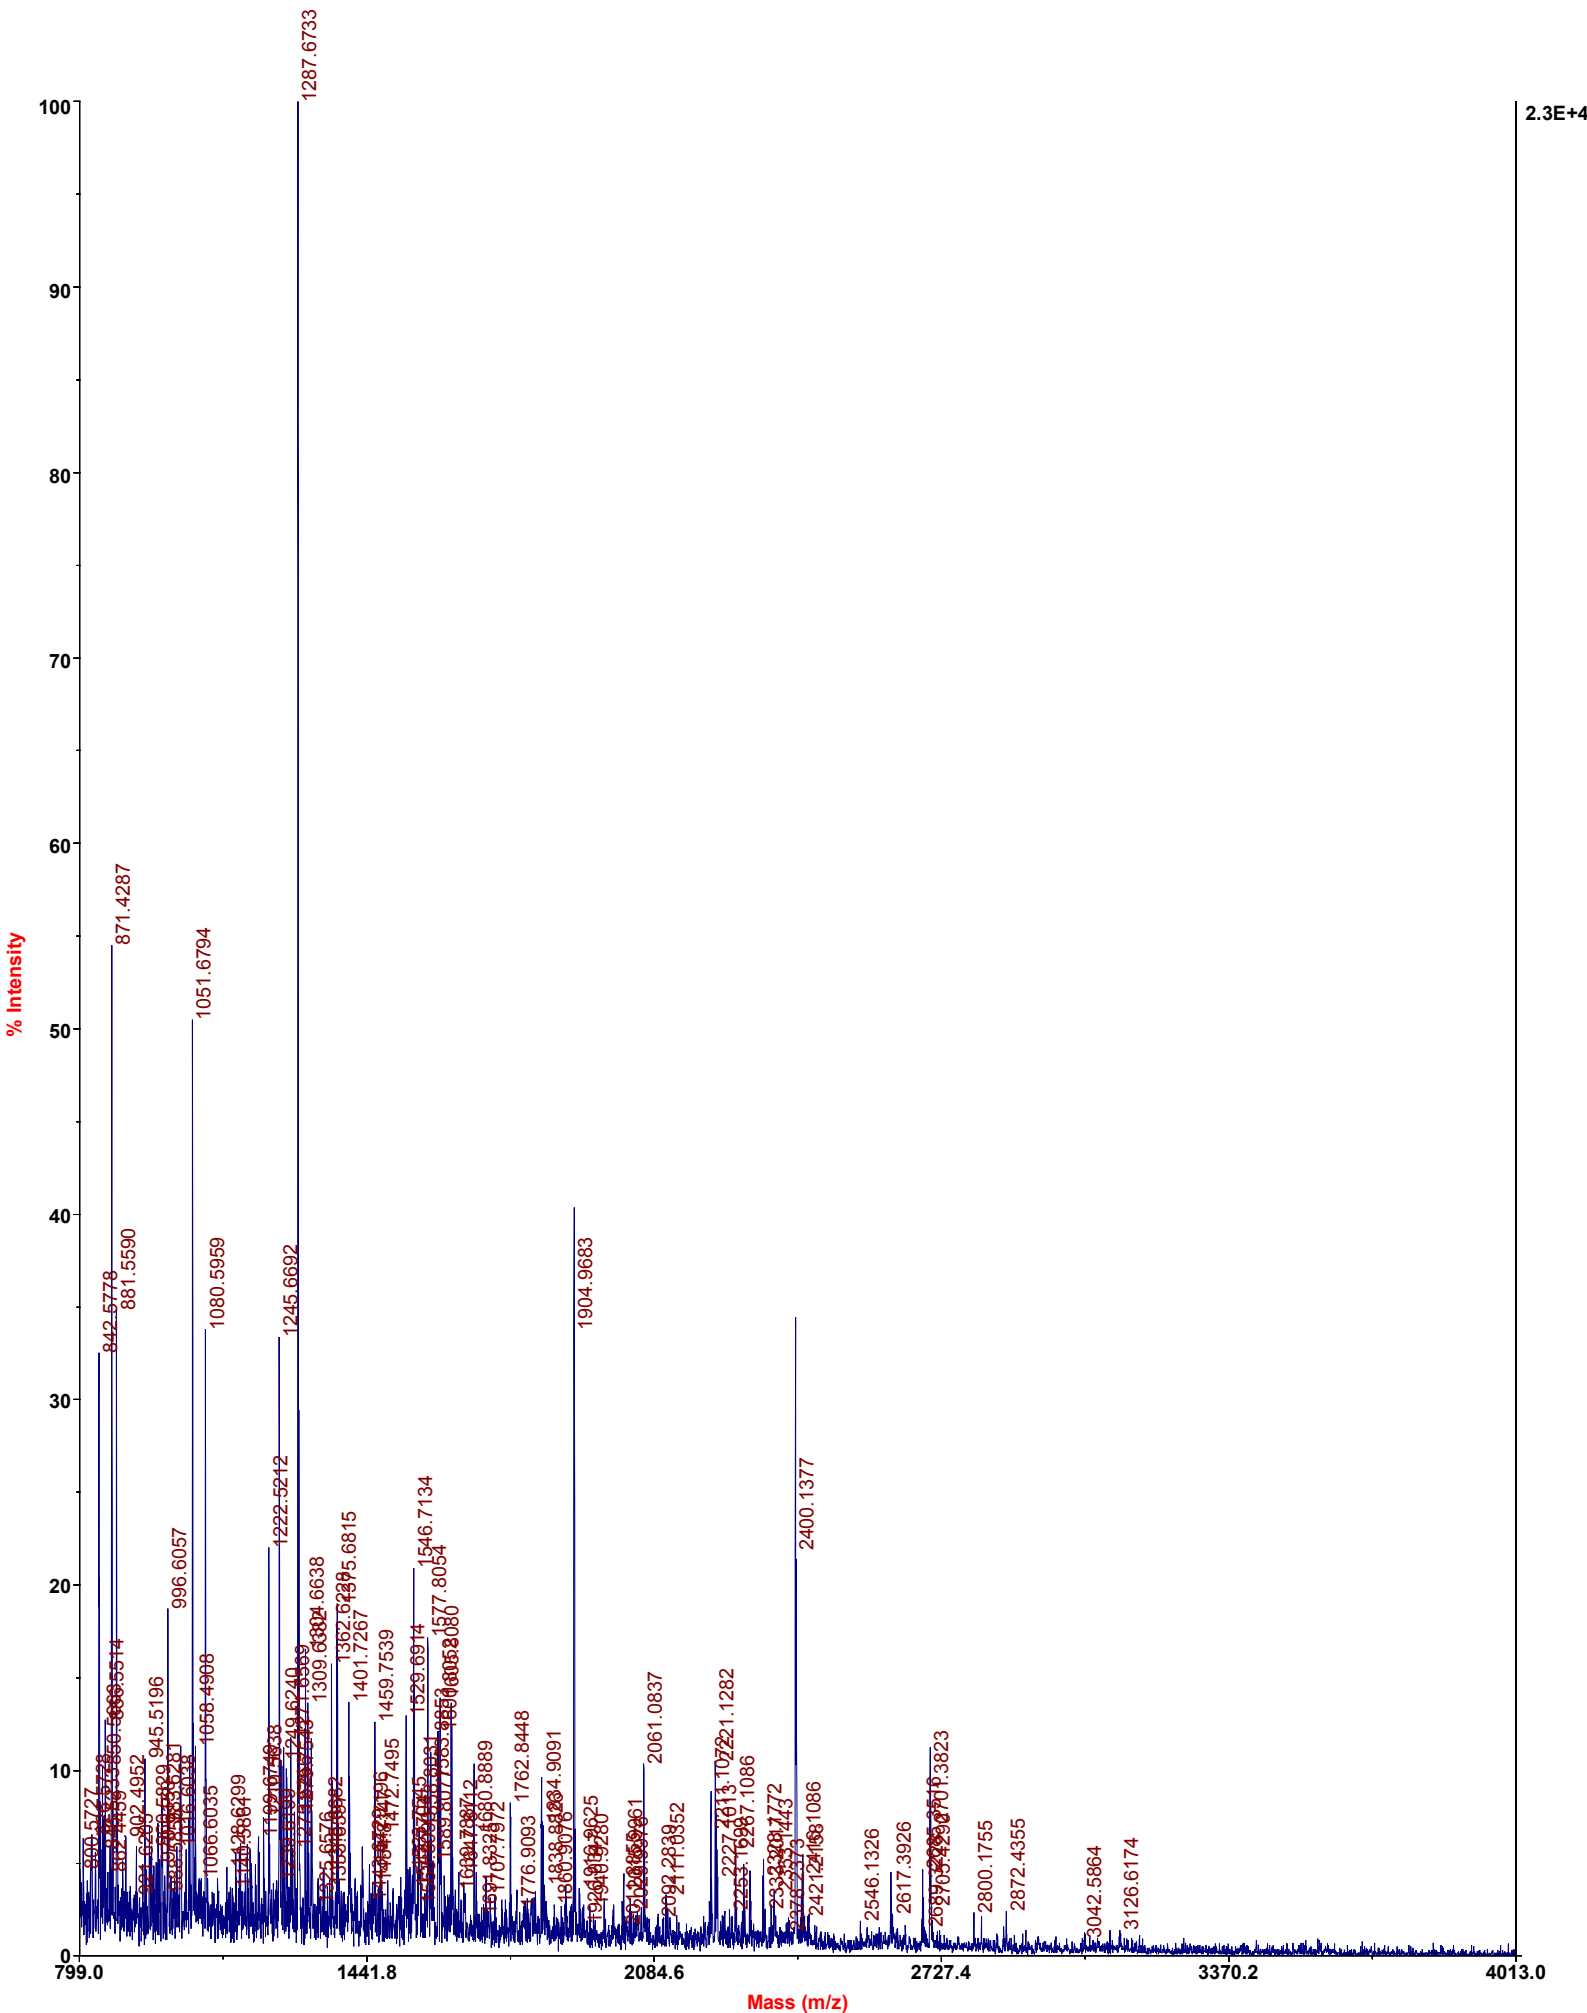

Supplement: s1 [file s1]

4700 Reflector Spec #1 MC[BP = 1207.6, 36031]

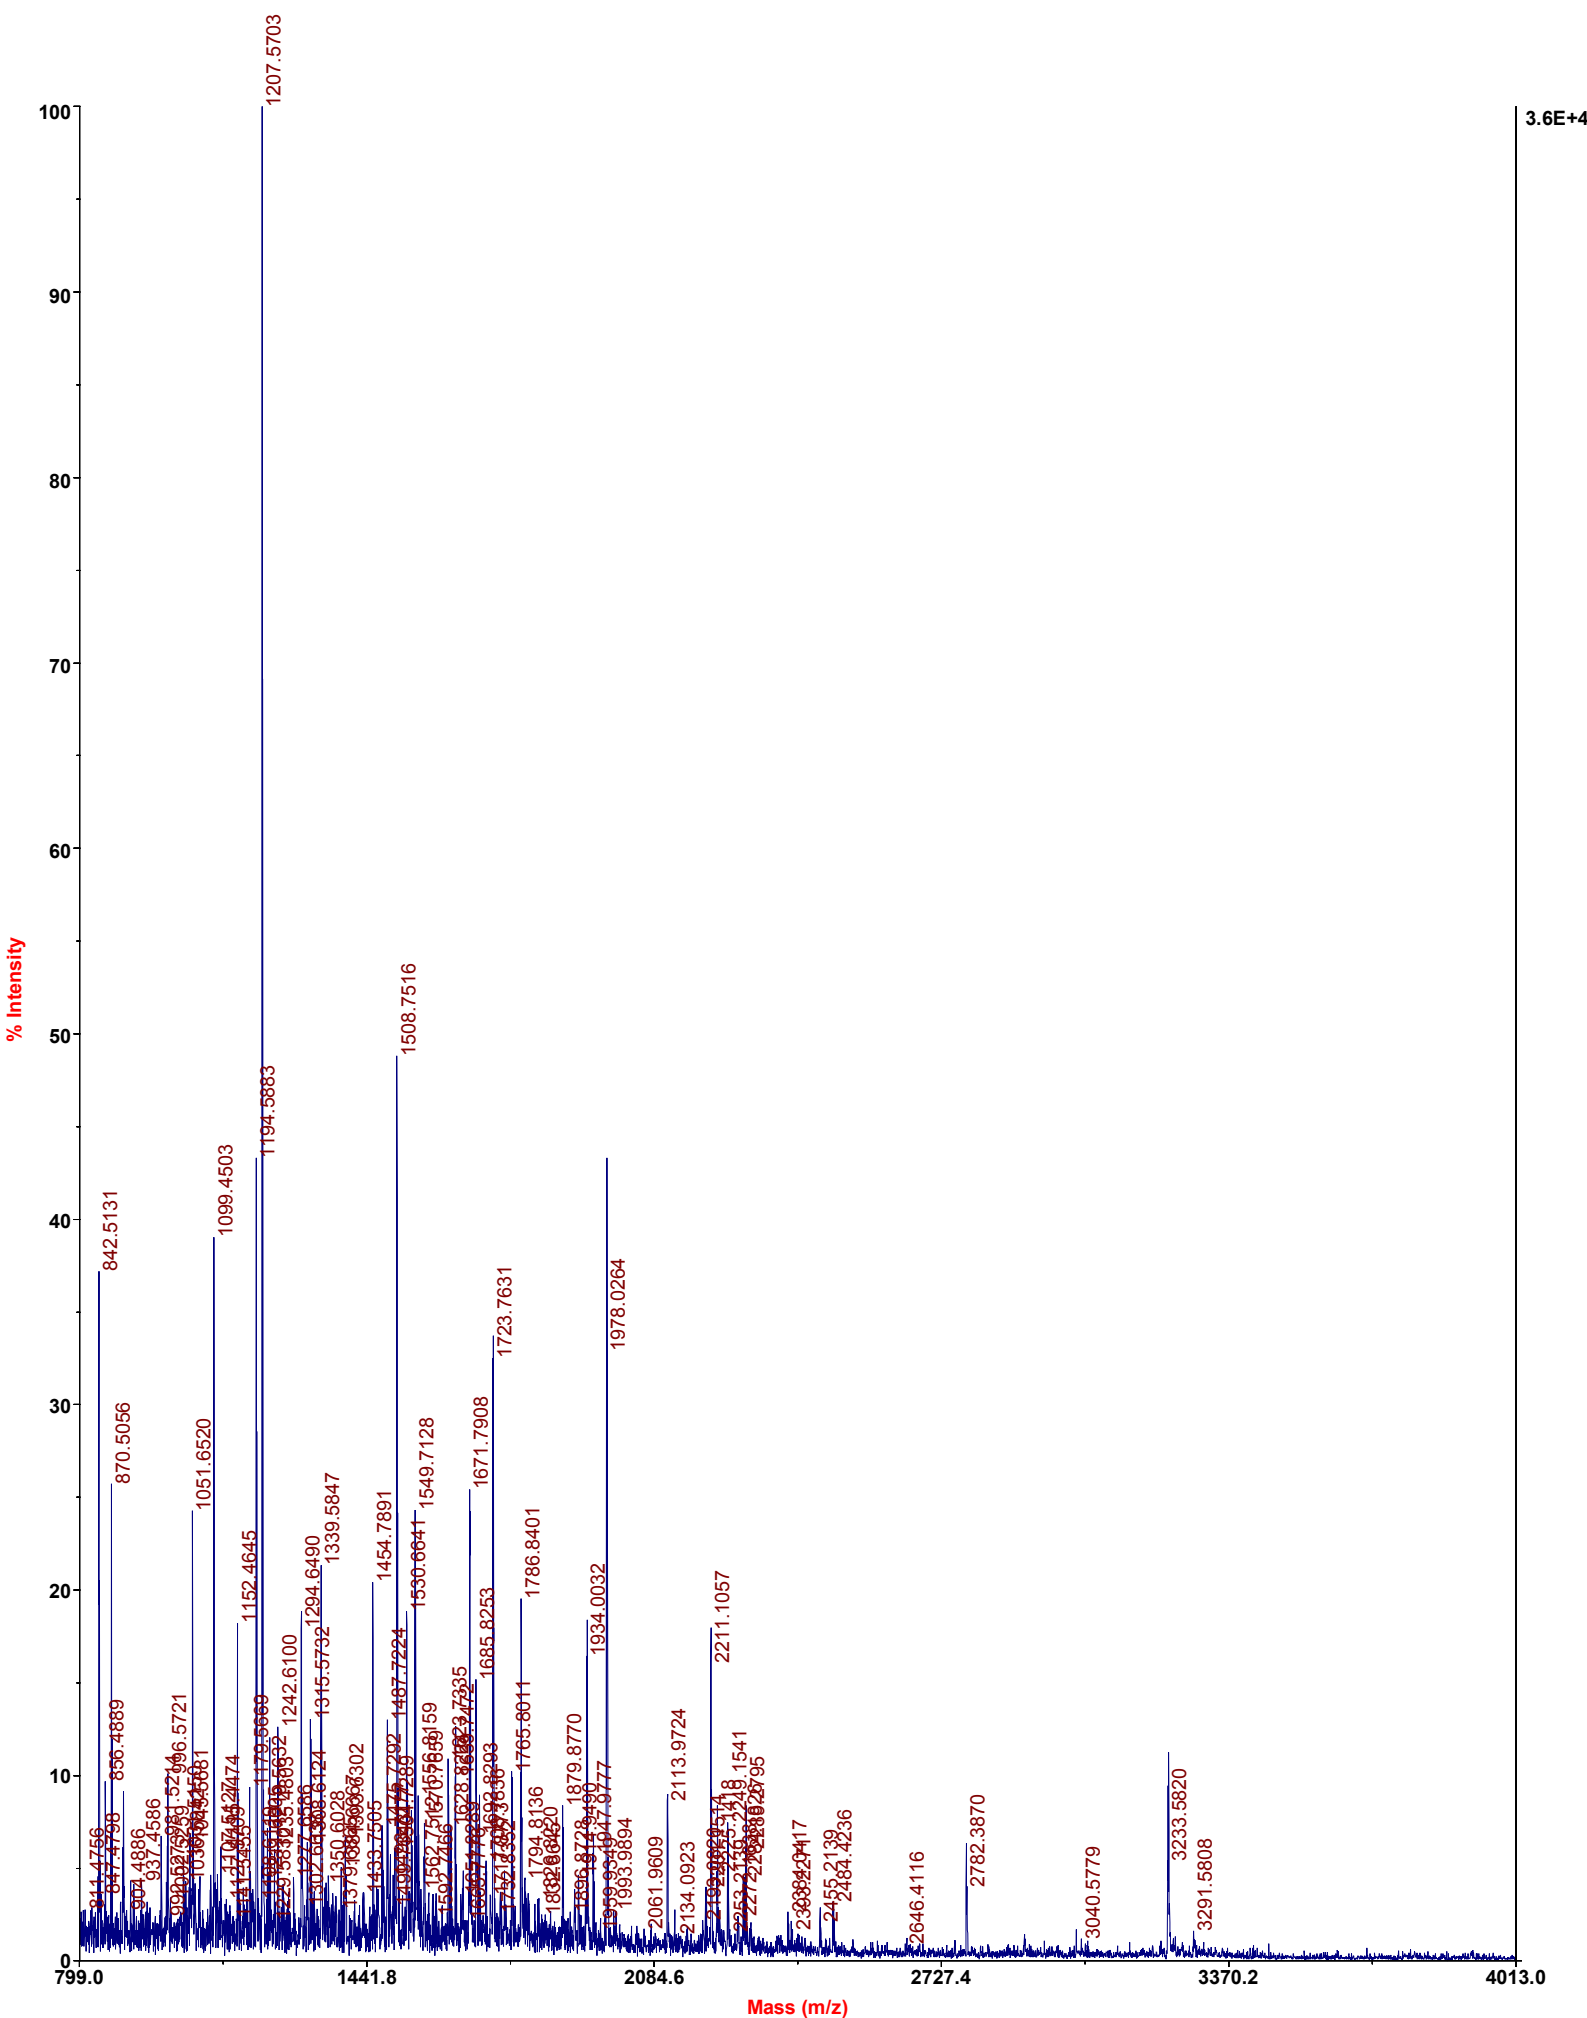

Supplement: s1 [file s1]

4700 Reflector Spec #1 MC[BP = 1002.5, 12235]

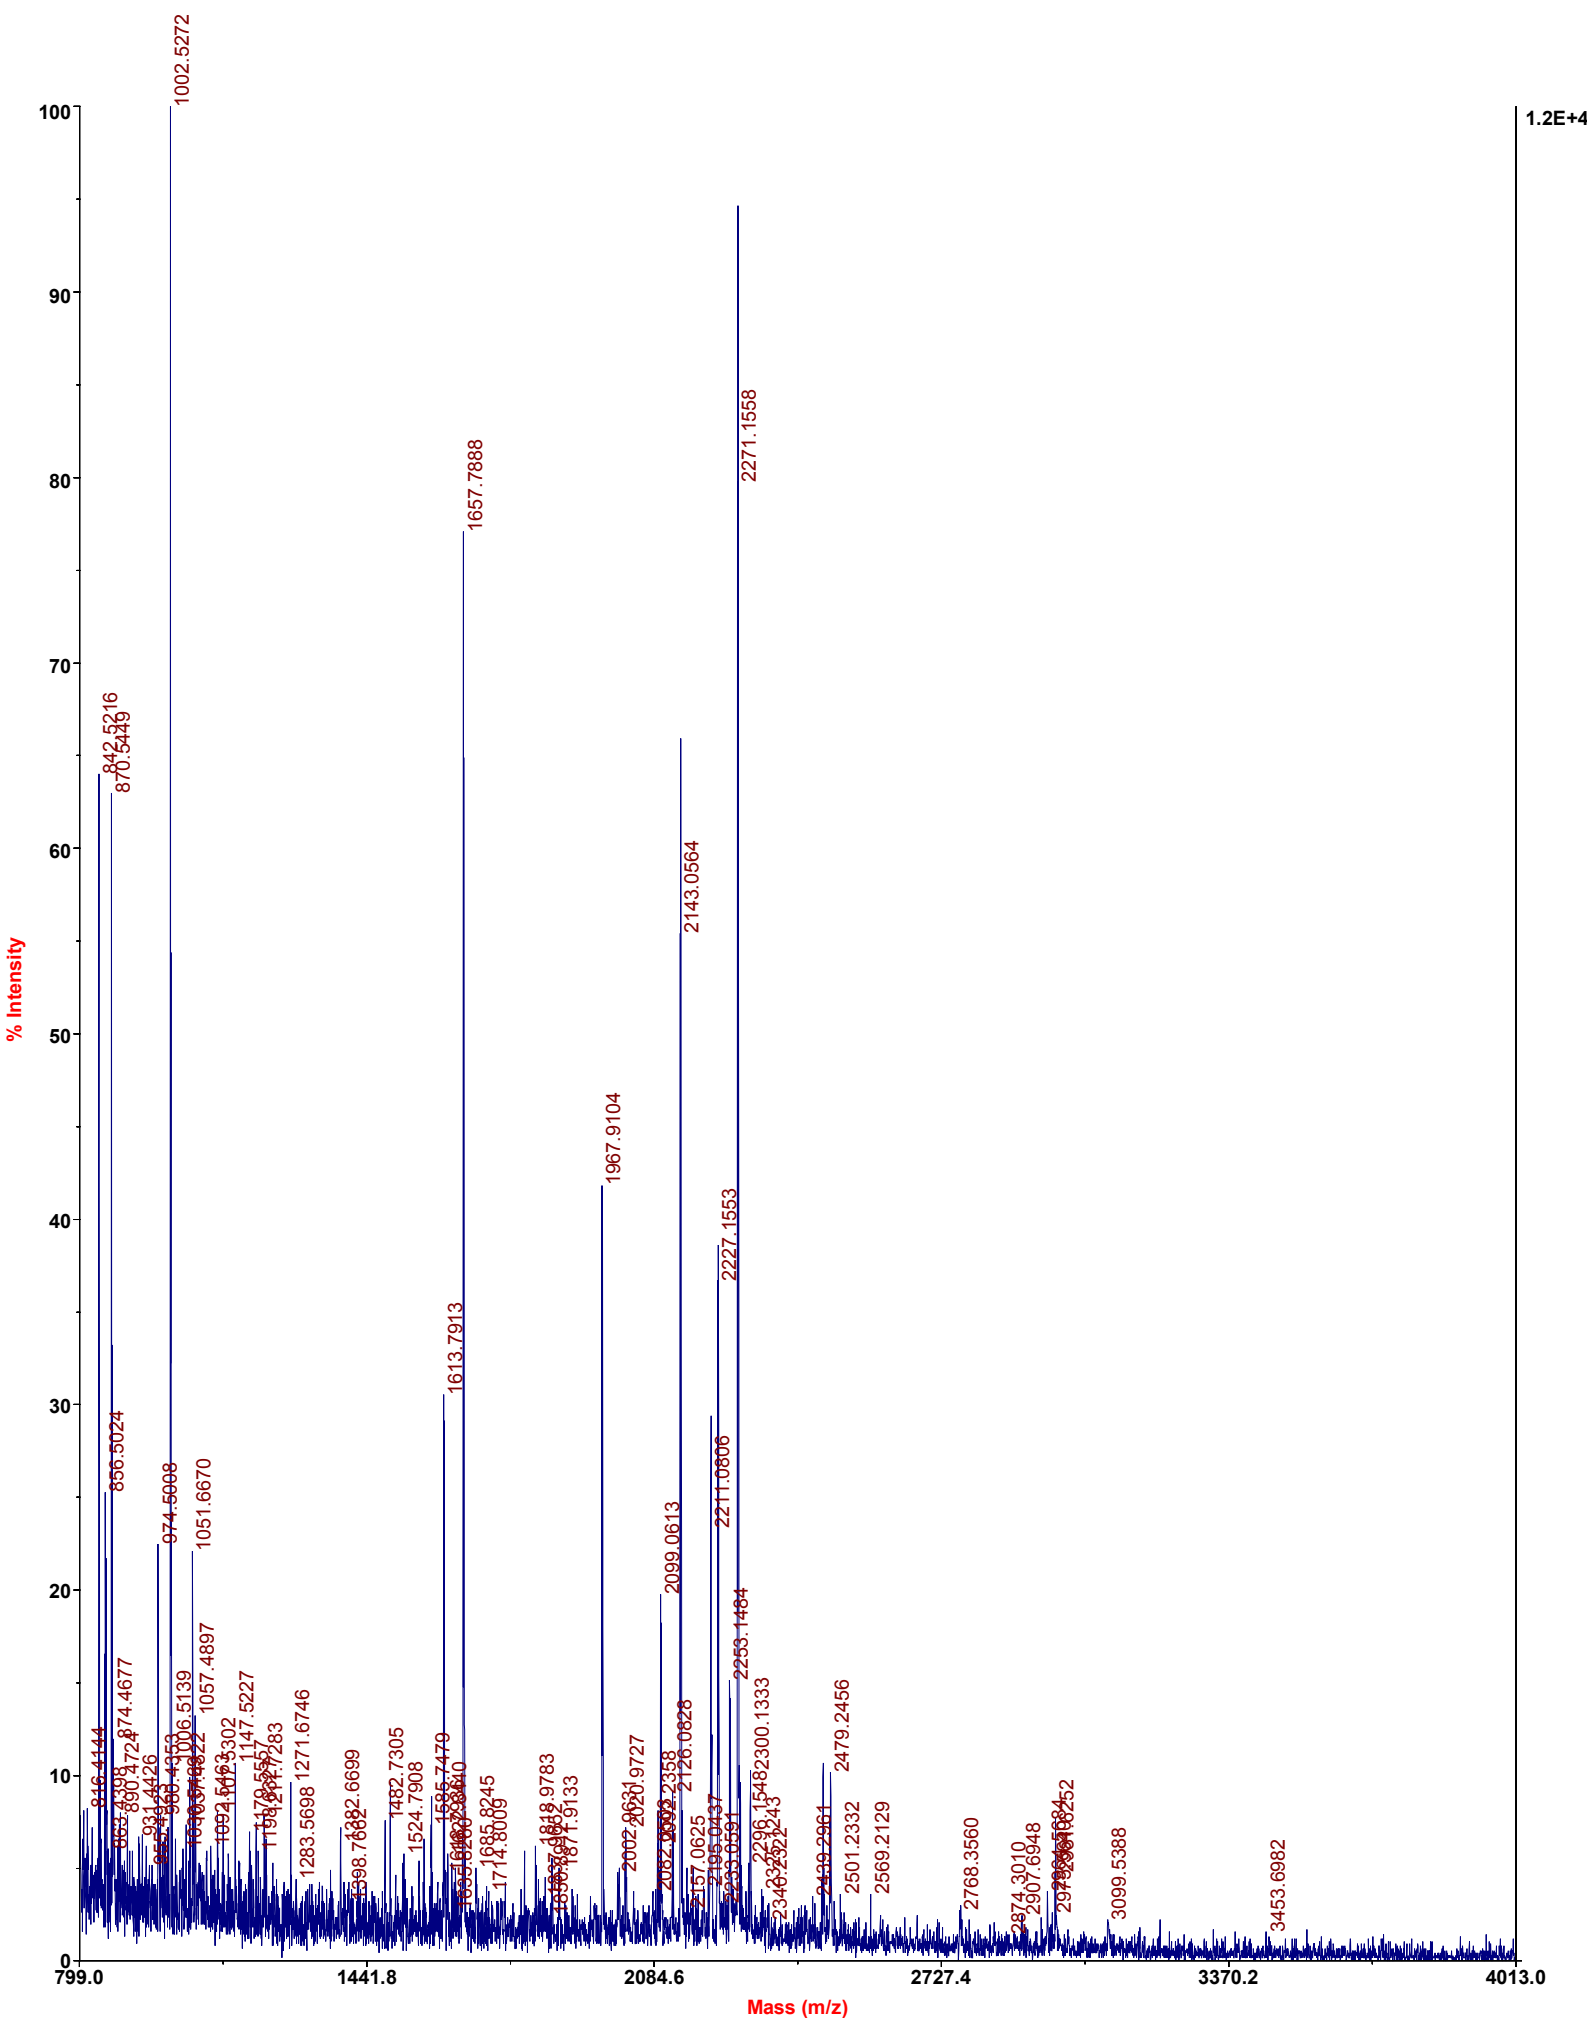

Supplement: s1 [file s1]

4700 Reflector Spec #1 MC[BP = 1021.5, 24941]

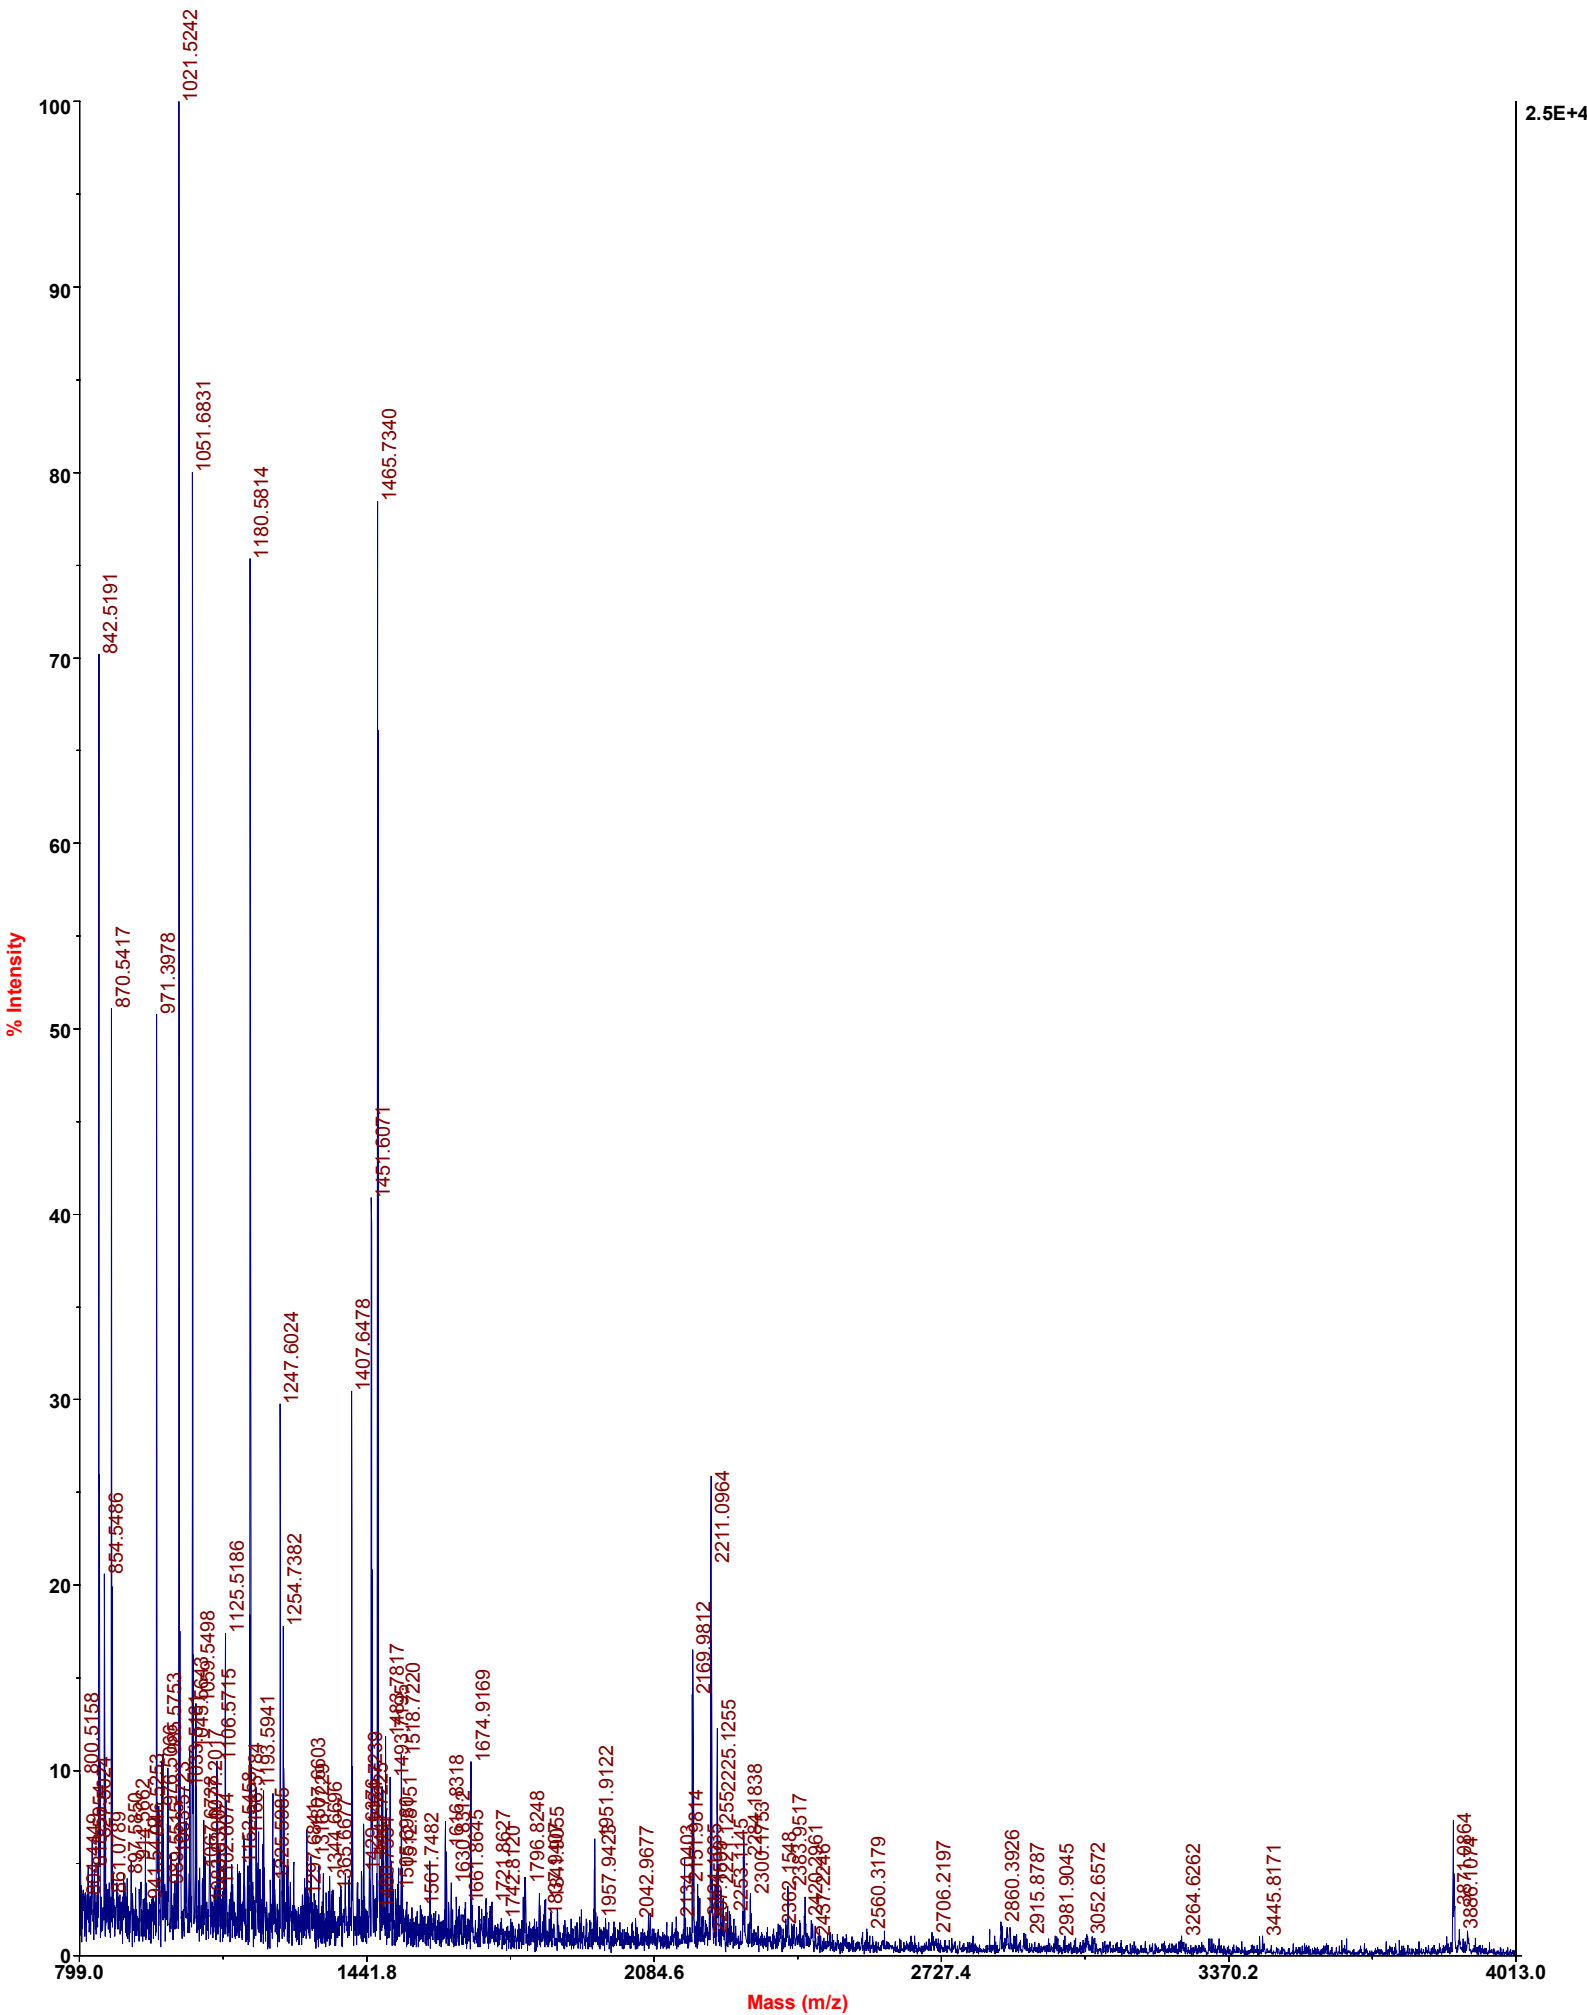

Supplement: s1 [file s1]

4700 Reflector Spec #1 MC[BP = 1051.6, 6980]

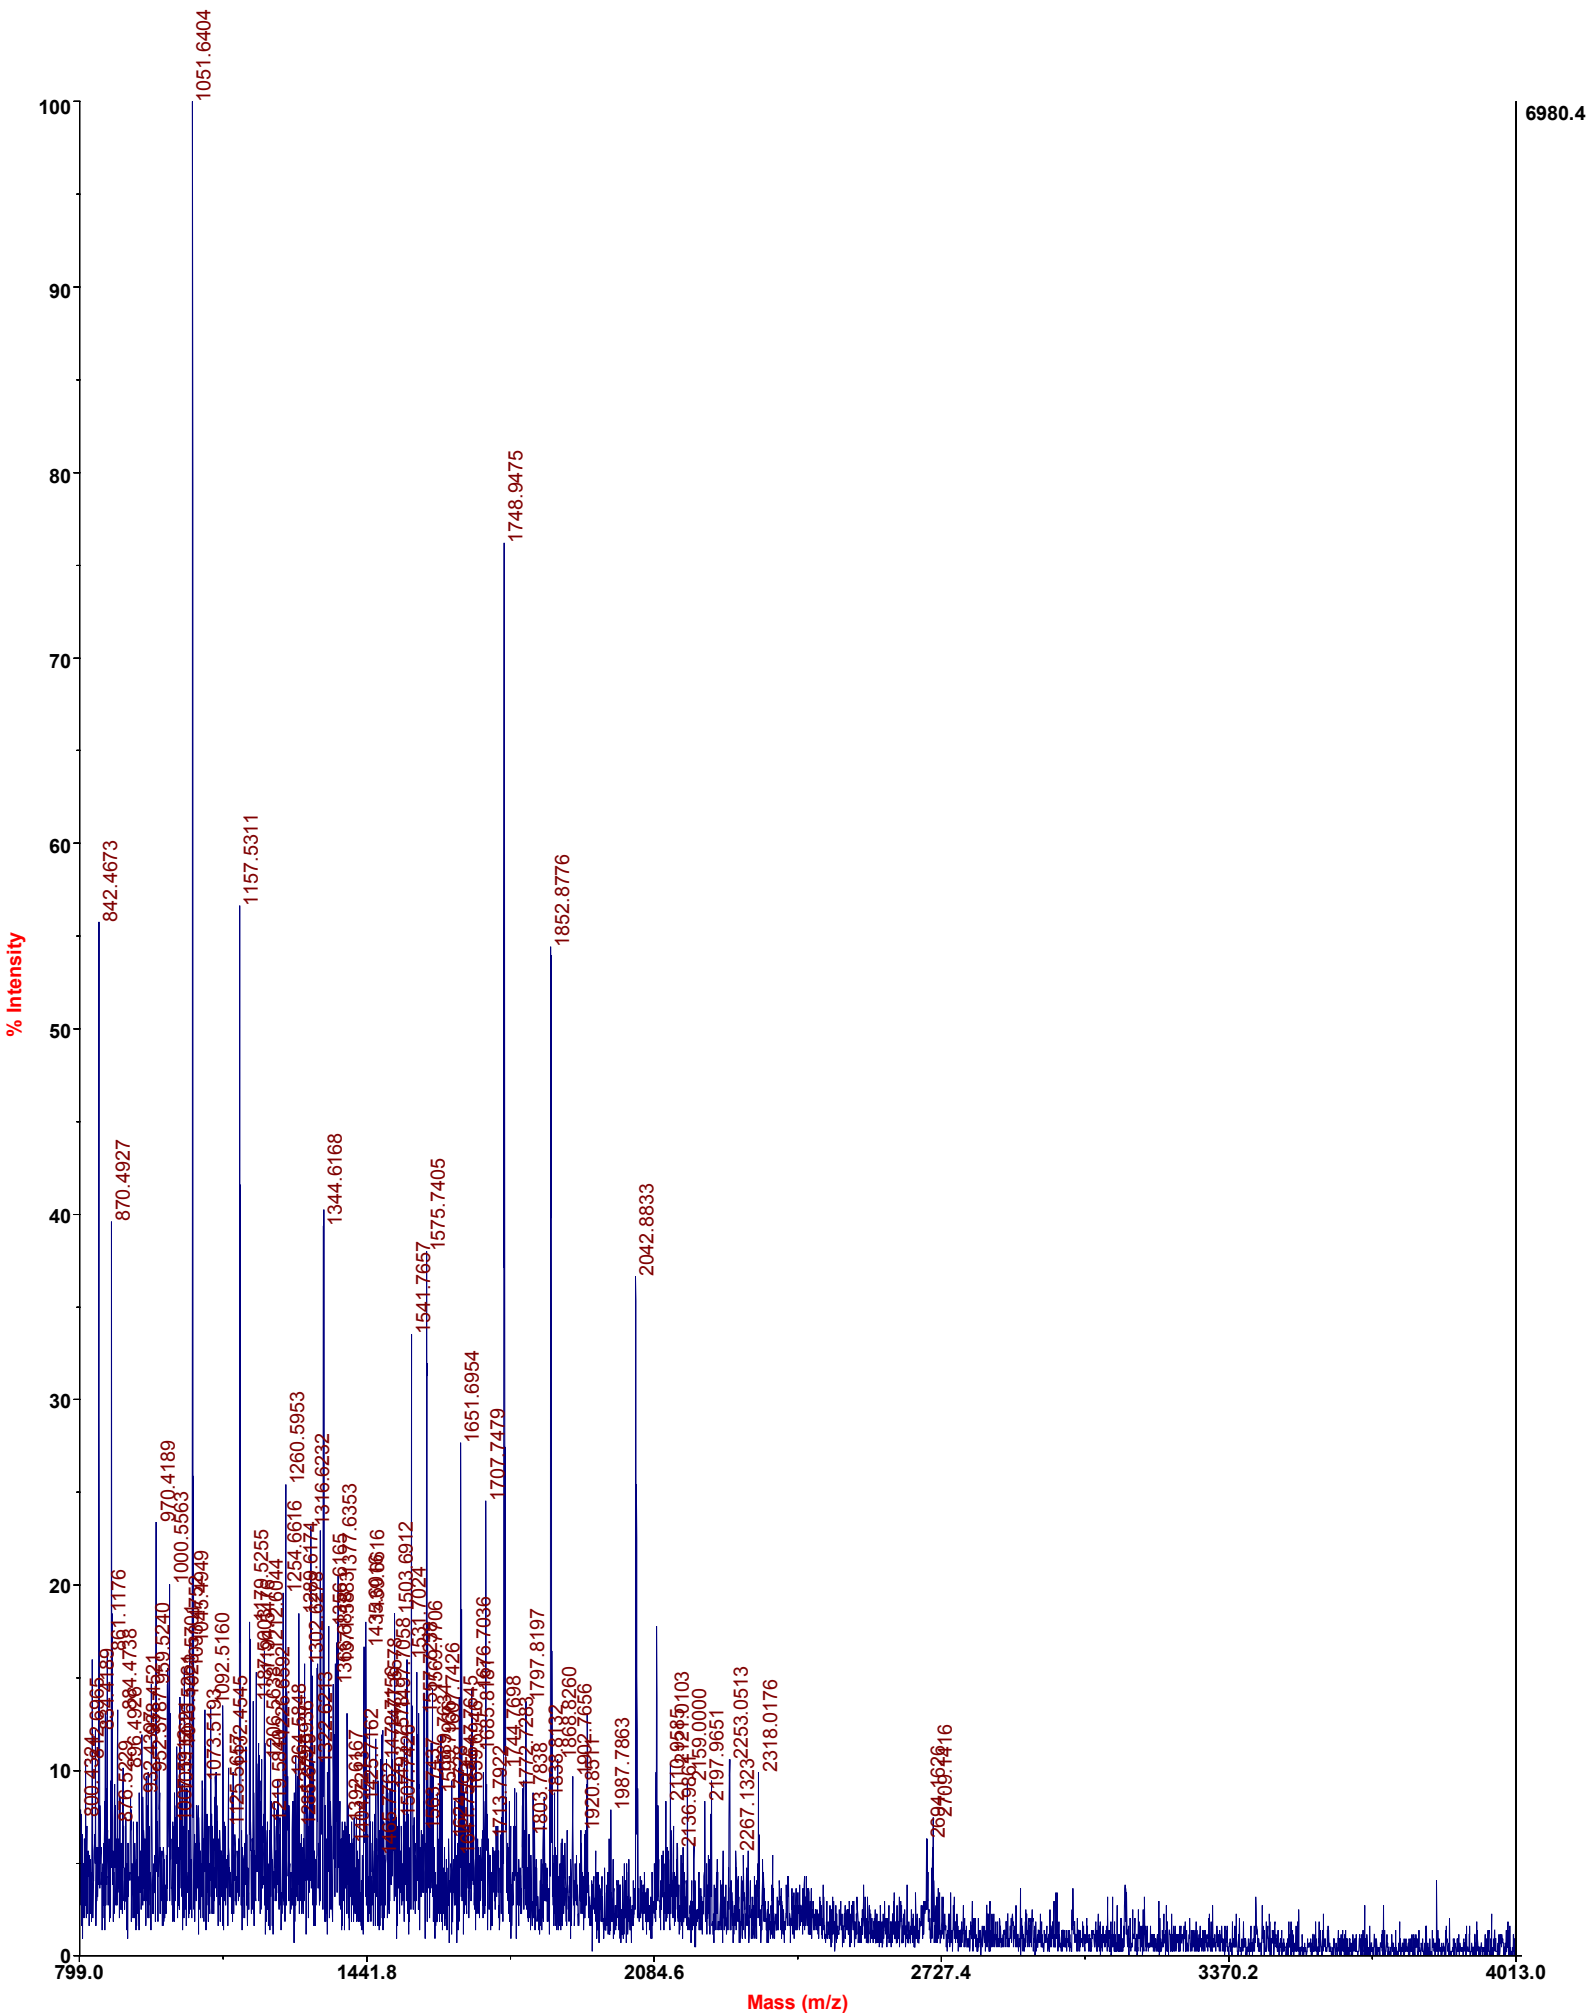

Supplement: s1 [file s1]

4700 MS/MS Precursor 870.505 Spec #1 MC[BP = 870.6, 1428]

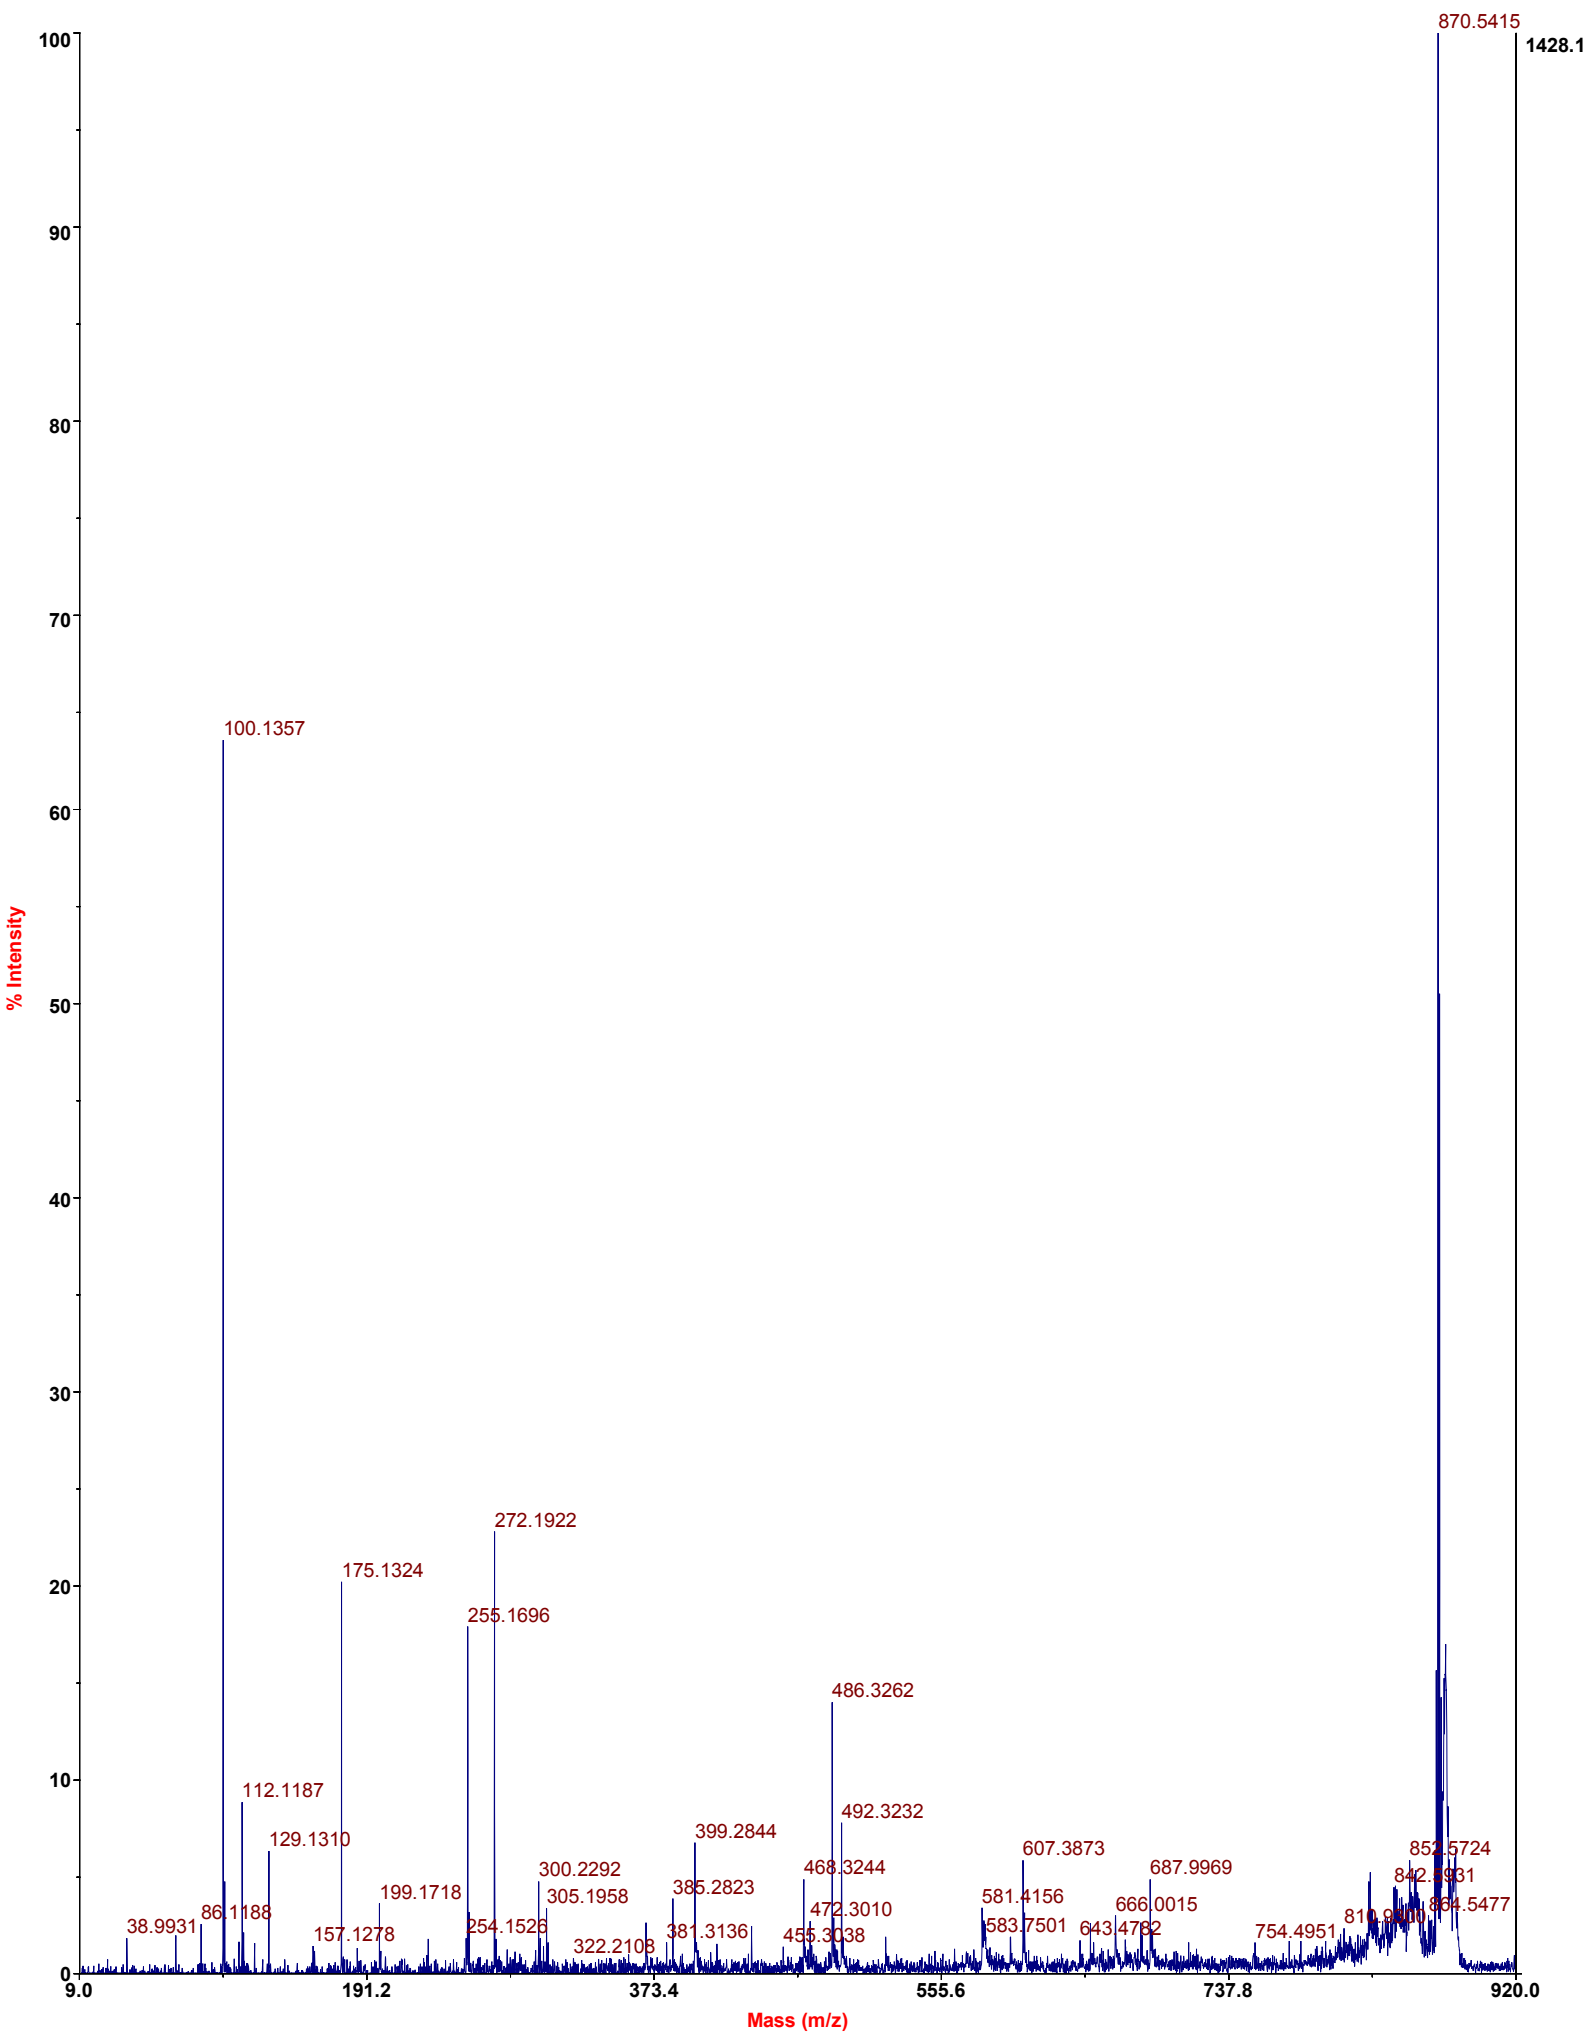

Supplement: s1 [file s1]

4700 MS/MS Precursor 870.573 Spec #1 MC[BP = 870.5, 277]

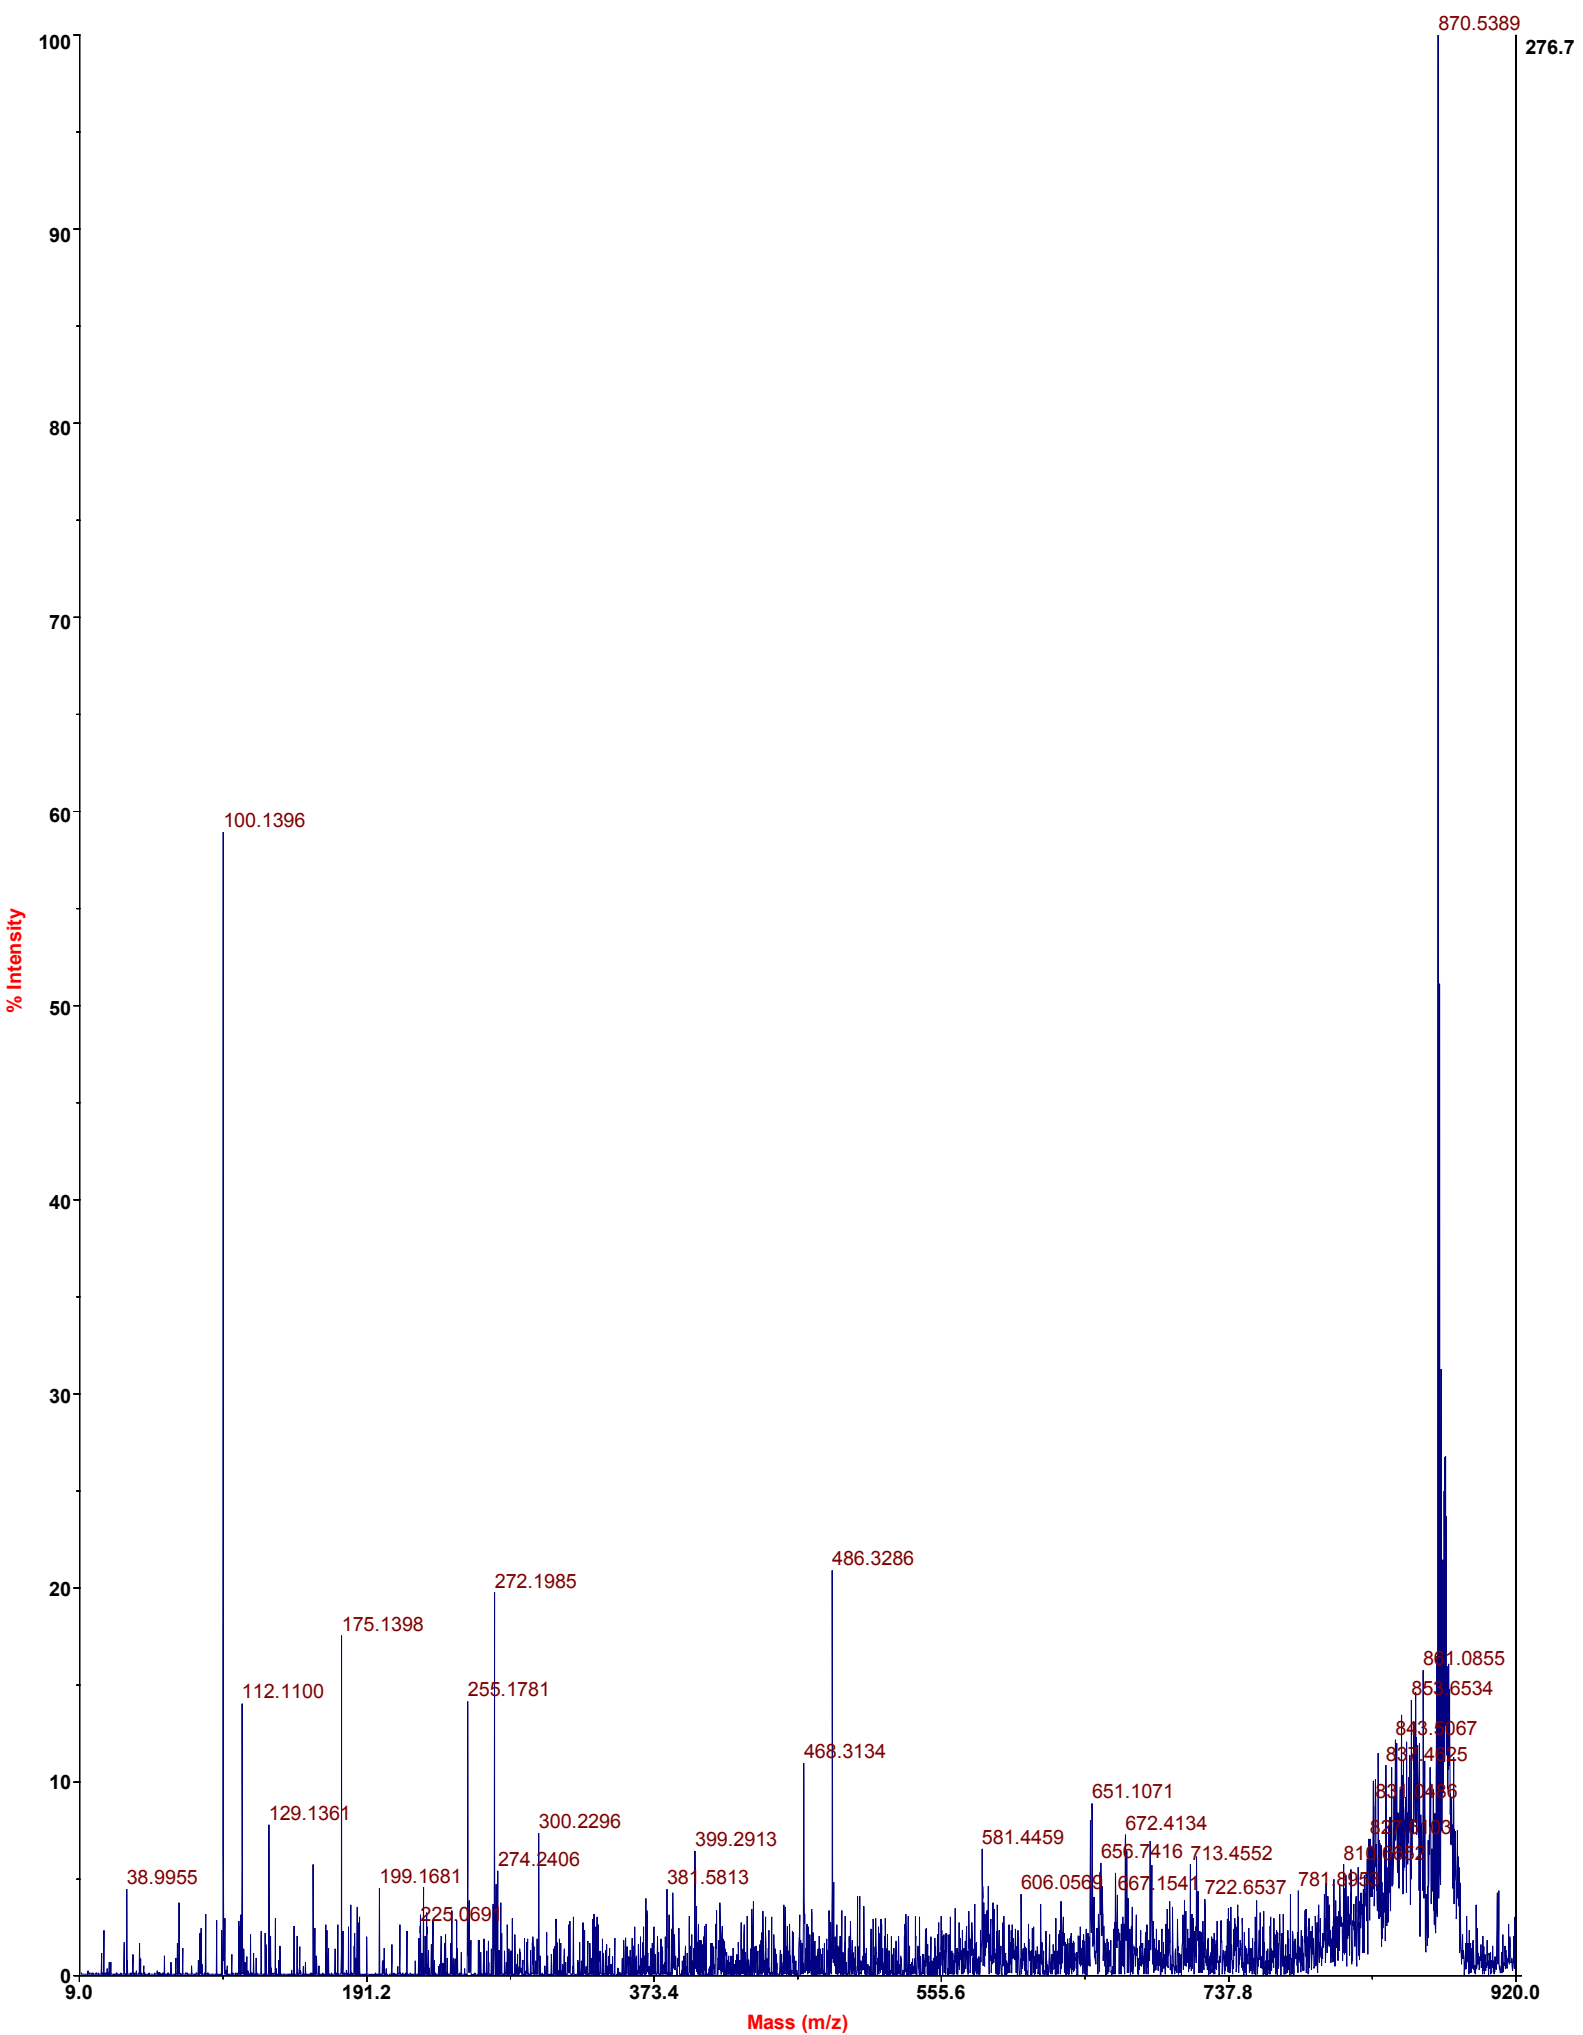

Supplement: s1 [file s1]

# Applied Biosystems 4700 Proteomics Analyzer 7044

4700 Reflector Spec #1 MC[BP = 1465.7, 19059]

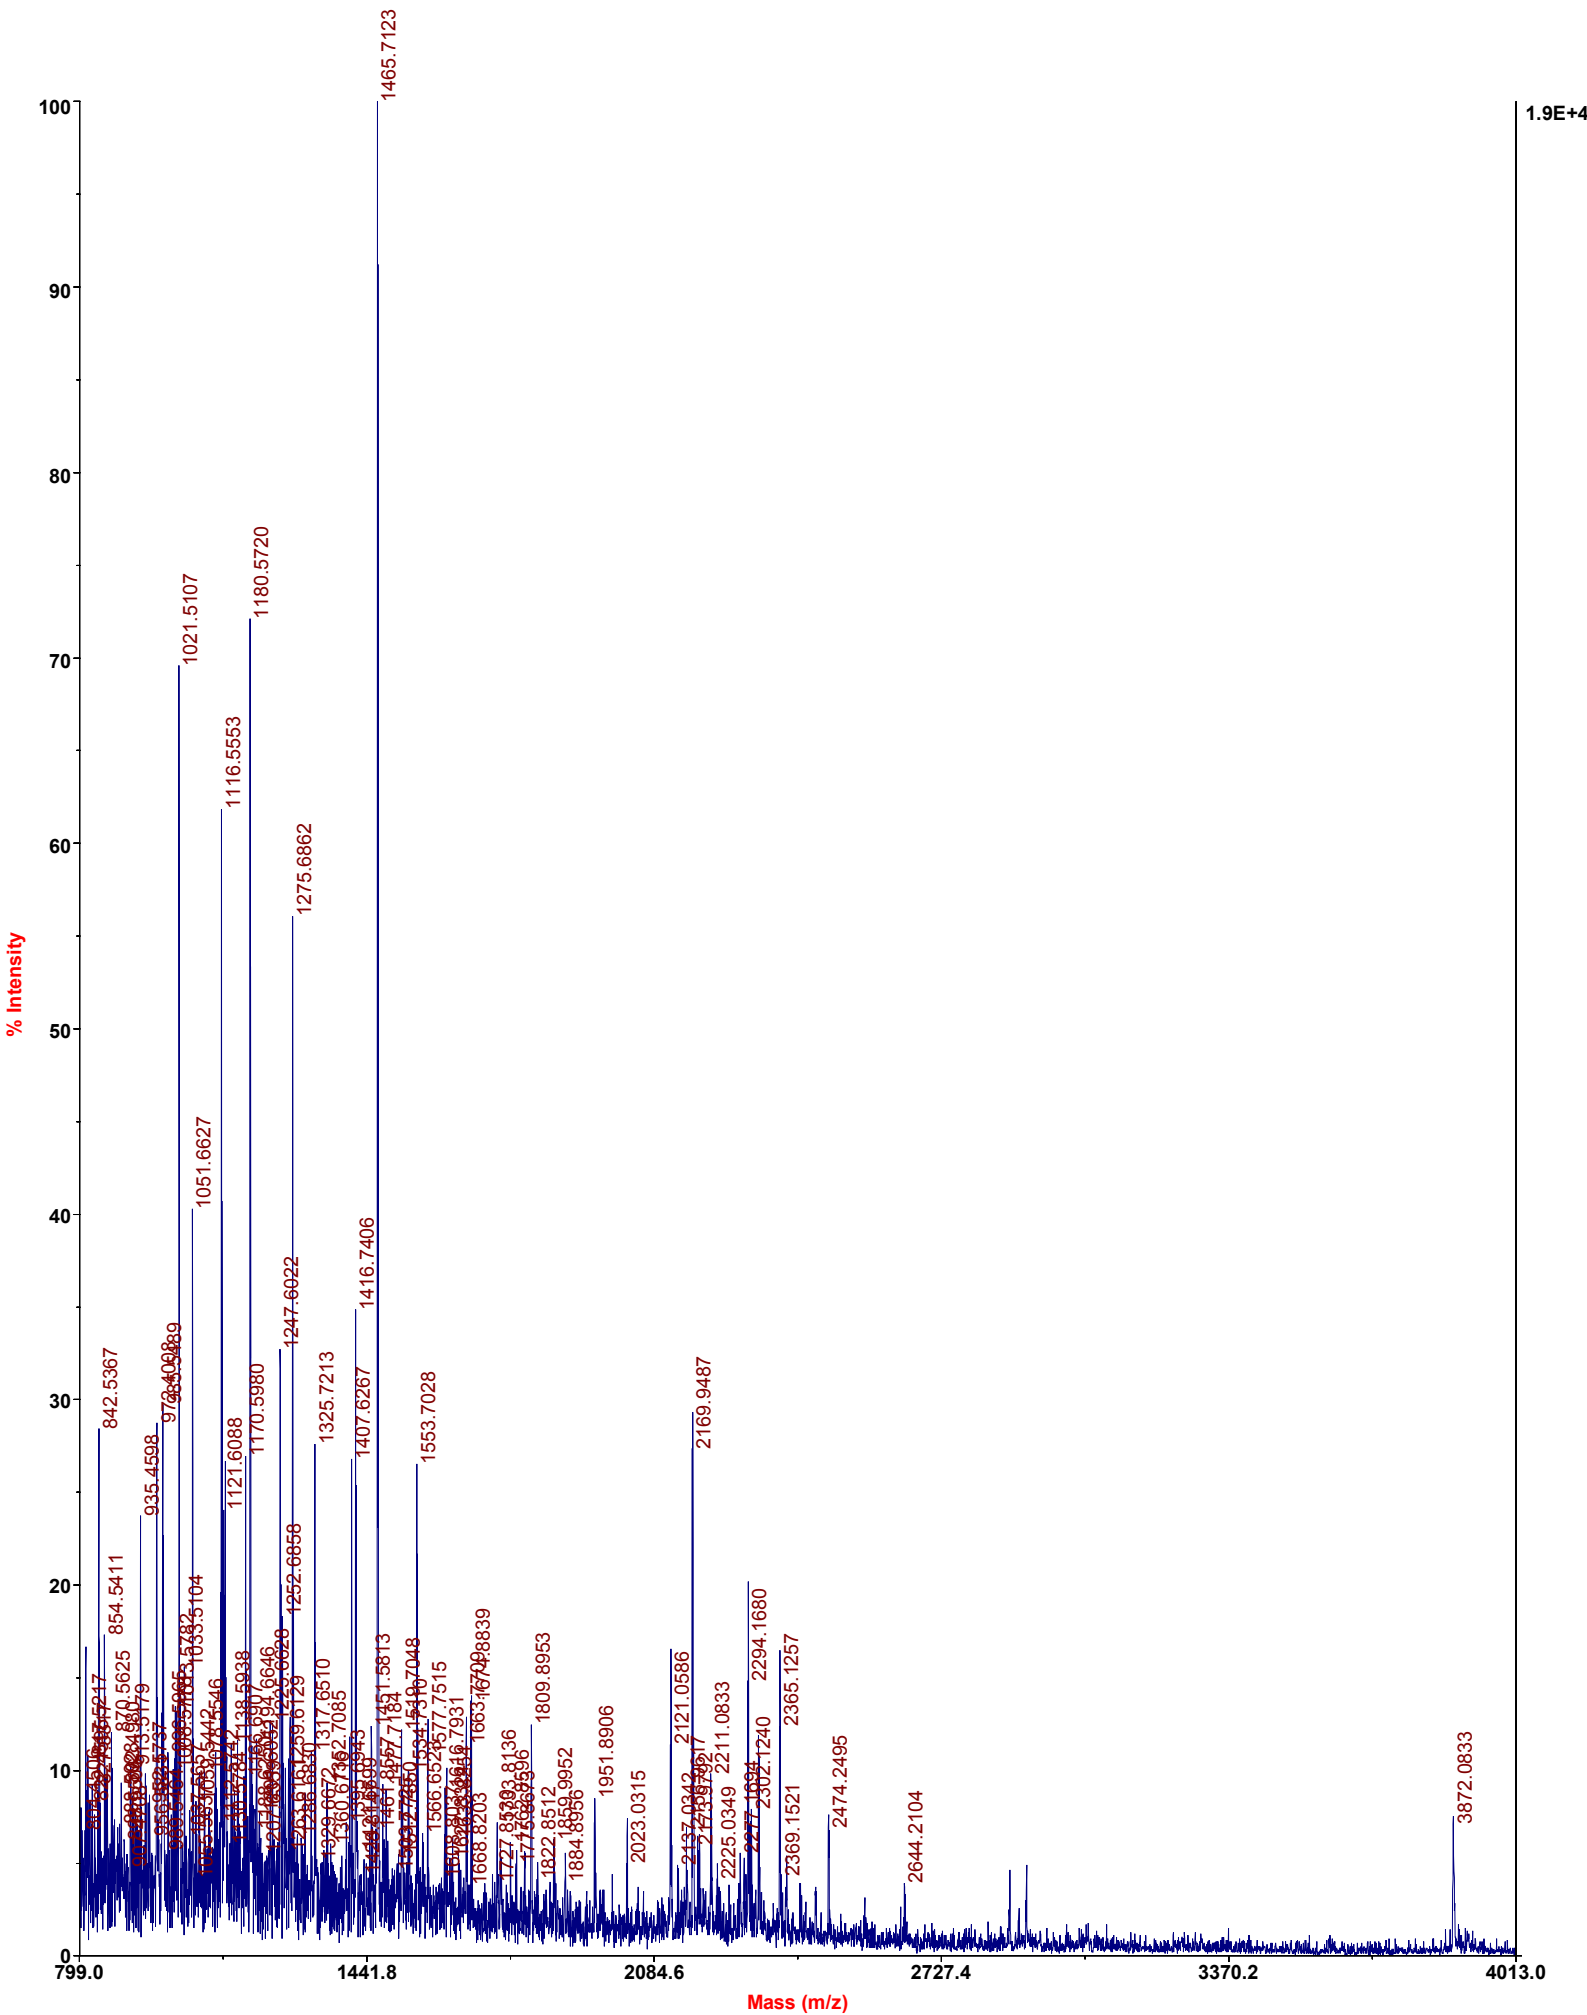

Printed: 12:58, March 31, 2014

Supplement: s1 [file s1]

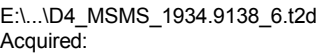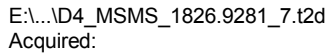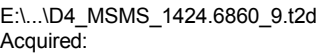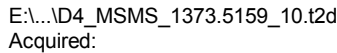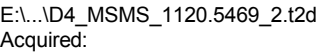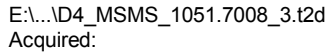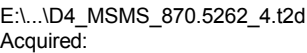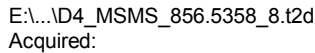

Supplement: s1 [file s1]
